# Supplementary material for: Computational and Functional Analysis of Structural Features in the ZAKα Kinase
Source: MDPI journal article supplement (doi:10.3390/cells12060969), 2023-03-22
Supplement: s1 [file s1]

---

Binding Region. **(b)** To assign statistical significance to our pair-wise comparison score ( $S(A,B)$ ), we employed the Z-score ( $Z(A,B)$ ) developed by Holm and colleagues (27). **(c)** Secondary sequence alignment of ZAK $\alpha$  YLD and the DALI hits from Figure 3b-i. Gaps indicate unaligned regions. Uppercase letters denote structurally equivalent positions with ZAK $\alpha$  YLD, whereas lowercase letters denote insertions relative to ZAK $\alpha$  YLD. The most frequent secondary structure to which a specific amino acid residue contributes at a specific position is colored in each column. H/h, helix, E/e, strand, L/l, coil.

**Table S1. DALI hits from comparison of amino acids 433-550 of ZAK $\alpha$  against the human AlphaFold database.** DALI hits with Z scores above or equal 2 are shown.

**Table S2. JSON PAE amino acid array in excel format.** The JSON PAE file can be downloaded from <https://alphafold.ebi.ac.uk/>, and the code can be accessed via [https://github.com/Valdemar-BI-Johansen/MAP3K20\\_PAE.git](https://github.com/Valdemar-BI-Johansen/MAP3K20_PAE.git).
