# Supplementary material for: Computational and Functional Analysis of Structural Features in the ZAKα Kinase
Source: Cells. 2023 Mar 22;12(6):969. doi: 10.3390/cells12060969 (PMC10047201; doi:10.3390/cells12060969)
Supplement: Supplementary file 1 [file cells-12-00969-s001.zip › Table S1.xlsx]

## Sheet: Table S1
DALI analysis of PDB: Human AF-Q9NYL2-F1: MAP3K20: ZAKa. Subjected to a pairwise hierarchical AlphaFold database search by distance assisted matrix alignment
Number in Dali Analysis	Chain	Z score	Rmsd	LALI	Nres	% id	File format	ID Description	Protein Name
2	e772-A	11.4	2.4	112	559	11	PDB	HUMAN:AF-Q03111-F1	PROTEIN ENL;
3	e5hz-A	11	2.4	111	568	11	PDB	HUMAN:AF-P42568-F1	PROTEIN AF-9;
4	e8tz-A	10.8	2.5	108	483	12	PDB	HUMAN:AF-Q6STE5-F1	SWI/SNF-RELATED MATRIX-ASSOCIATED ACTIN-DEPENDENT
5	fbpd-A	10.7	2.3	110	227	13	PDB	HUMAN:AF-O95619-F1	YEATS DOMAIN-CONTAINING PROTEIN 4;
6	ez21-A	10.4	2.6	108	531	10	PDB	HUMAN:AF-Q92925-F1	SWI/SNF-RELATED MATRIX-ASSOCIATED ACTIN-DEPENDENT
7	fasw-A	10.1	2.5	108	515	10	PDB	HUMAN:AF-Q96GM5-F1	SWI/SNF-RELATED MATRIX-ASSOCIATED ACTIN-DEPENDENT
8	e7ug-A	9.1	2.5	109	1422	22	PDB	HUMAN:AF-Q9ULM3-F1	YEATS DOMAIN-CONTAINING PROTEIN 2;
9	fc8w-A	7.3	3.9	97	1090	9	PDB	HUMAN:AF-Q70J99-F1	PROTEIN UNC-13 HOMOLOG D;
10	e41h-A	7.3	4	98	1187	10	PDB	HUMAN:AF-O94812-F1	BAI1-ASSOCIATED PROTEIN 3;
11	e4bf-A	7.2	2.9	86	370	8	PDB	HUMAN:AF-Q9BZW8-F1	NATURAL KILLER CELL RECEPTOR 2B4;
12	fdbq-A	7.2	3.7	96	1092	7	PDB	HUMAN:AF-Q9ULE0-F1	PROTEIN WWC3;
13	e06k-A	7.2	4.1	91	680	4	PDB	HUMAN:AF-P23352-F1	ANOSMIN-1;
14	e4my-A	7.2	3.6	93	979	10	PDB	HUMAN:AF-Q99650-F1	ONCOSTATIN-M-SPECIFIC RECEPTOR SUBUNIT BETA;
15	fc9c-A	7.2	4.6	102	419	9	PDB	HUMAN:AF-Q8N9I0-F1	SYNAPTOTAGMIN-2;
16	e5n9-A	7.2	3.8	99	188	10	PDB	HUMAN:AF-Q58G82-F1	PUTATIVE SYNAPTOTAGMIN-14-LIKE PROTEIN;
17	e5im-A	7.1	4.1	99	1192	5	PDB	HUMAN:AF-Q6AWC2-F1	PROTEIN WWC2;
18	e0jf-A	7.1	3.8	85	1400	9	PDB	HUMAN:AF-Q02388-F3	COLLAGEN ALPHA-1(VII) CHAIN;
19	faup-A	7.1	3.6	84	1400	10	PDB	HUMAN:AF-Q02388-F2	COLLAGEN ALPHA-1(VII) CHAIN;
20	e2un-A	7.1	2.9	95	862	7	PDB	HUMAN:AF-Q99665-F1	INTERLEUKIN-12 RECEPTOR SUBUNIT BETA-2;
21	e066-A	7.1	4.1	99	400	10	PDB	HUMAN:AF-Q14183-F1	DOUBLE C2-LIKE DOMAIN-CONTAINING PROTEIN ALPHA;
22	e3f6-A	07:01:00	03:02:00	85	1400	4	PDB	HUMAN:AF-Q02388-F1	COLLAGEN ALPHA-1(VII) CHAIN;
23	e298-A	07:01:00	04:00:00	99	403	14	PDB	HUMAN:AF-O43581-F1	SYNAPTOTAGMIN-7;
24	fgil-A	07:01:00	03:07:00	97	645	8	PDB	HUMAN:AF-Q17RD7-F1	SYNAPTOTAGMIN-16;
25	e8rb-A	07:00:00	04:04:00	100	386	6	PDB	HUMAN:AF-O00445-F1	SYNAPTOTAGMIN-5;
26	e8cp-A	07:00:00	04:00:00	101	934	7	PDB	HUMAN:AF-Q9HCH5-F1	SYNAPTOTAGMIN-LIKE PROTEIN 2;
27	ff5e-A	07:00:00	03:09:00	95	803	9	PDB	HUMAN:AF-O43374-F1	RAS GTPASE-ACTIVATING PROTEIN 4;
28	fbyt-A	06:09:00	03:08:00	91	732	10	PDB	HUMAN:AF-Q8NI17-F1	INTERLEUKIN-31 RECEPTOR SUBUNIT ALPHA;
29	ffct-A	06:09:00	04:02:00	97	401	4	PDB	HUMAN:AF-Q8NBV8-F1	SYNAPTOTAGMIN-8;
30	feec-A	06:09:00	03:07:00	91	1445	8	PDB	HUMAN:AF-O75747-F1	PHOSPHATIDYLINOSITOL 4-PHOSPHATE 3-KINASE C2 DOMA
31	e3qe-A	06:09:00	04:02:00	99	1686	5	PDB	HUMAN:AF-O00443-F1	PHOSPHATIDYLINOSITOL 4-PHOSPHATE 3-KINASE C2 DOMA
32	fcn8-B	06:09:00	02:09:00	85	1479	6	PDB	HUMAN:AF-O75369-F1
33	e5y0-A	06:09:00	03:09:00	95	803	9	PDB	HUMAN:AF-C9J798-F1	RAS GTPASE-ACTIVATING PROTEIN 4B;
34	e9zt-A	06:09:00	03:01:00	89	435	10	PDB	HUMAN:AF-Q8N3G9-F1	TRANSMEMBRANE PROTEIN 130;
35	ff2w-A	06:09:00	03:06:00	100	834	10	PDB	HUMAN:AF-Q14644-F1	RAS GTPASE-ACTIVATING PROTEIN 3;
36	e1f3-A	06:09:00	04:03:00	97	426	5	PDB	HUMAN:AF-Q7L8C5-F1	SYNAPTOTAGMIN-13;
37	feg9-A	06:09:00	04:03:00	101	431	12	PDB	HUMAN:AF-Q9BT88-F1	SYNAPTOTAGMIN-11;
38	feck-A	06:08:00	04:02:00	99	491	11	PDB	HUMAN:AF-Q86SS6-F1	SYNAPTOTAGMIN-9;
39	e5rb-A	06:08:00	04:05:00	102	425	9	PDB	HUMAN:AF-Q9H2B2-F1	SYNAPTOTAGMIN-4;
40	e6lq-A	06:08:00	03:06:00	93	1097	5	PDB	HUMAN:AF-P42702-F1	LEUKEMIA INHIBITORY FACTOR RECEPTOR;
41	e8st-A	06:08:00	03:06:00	89	976	8	PDB	HUMAN:AF-P29317-F1	EPHRIN TYPE-A RECEPTOR 2;
42	fboy-A	06:07:00	04:03:00	99	510	7	PDB	HUMAN:AF-Q5T7P8-F1	SYNAPTOTAGMIN-6;
43	e9t1-A	06:07:00	03:07:00	87	716	7	PDB	HUMAN:AF-Q6UXK5-F1	LEUCINE-RICH REPEAT NEURONAL PROTEIN 1;
44	e67m-A	06:07:00	04:01:00	100	421	7	PDB	HUMAN:AF-Q9BQS2-F1	SYNAPTOTAGMIN-15;
45	e5qg-A	06:07:00	04:00:00	96	421	4	PDB	HUMAN:AF-Q8IV01-F1	SYNAPTOTAGMIN-12;
46	ez7g-A	06:07:00	04:03:00	100	610	9	PDB	HUMAN:AF-Q4VX76-F1	SYNAPTOTAGMIN-LIKE PROTEIN 3;
47	e1dz-A	06:07:00	04:00:00	98	412	10	PDB	HUMAN:AF-Q14184-F1	DOUBLE C2-LIKE DOMAIN-CONTAINING PROTEIN BETA;
48	few2-A	06:07:00	03:02:00	82	1948	6	PDB	HUMAN:AF-Q13332-F1	RECEPTOR-TYPE TYROSINE-PROTEIN PHOSPHATASE S;
49	e8b6-A	06:07:00	03:04:00	85	1400	1	PDB	HUMAN:AF-P22105-F9	TENASCIN-X;
50	fcxs-A	06:07:00	03:05:00	85	1400	1	PDB	HUMAN:AF-P22105-F7	TENASCIN-X;
51	e9io-A	06:07:00	03:04:00	85	1400	1	PDB	HUMAN:AF-P22105-F6	TENASCIN-X;
52	e0kr-A	06:06:00	04:01:00	99	730	10	PDB	HUMAN:AF-Q8TDW5-F1	SYNAPTOTAGMIN-LIKE PROTEIN 5;
53	e269-A	06:06:00	04:00:00	86	2201	6	PDB	HUMAN:AF-P24821-F1	TENASCIN;
54	e2wi-A	06:06:00	02:09:00	82	1306	9	PDB	HUMAN:AF-P08575-F1	RECEPTOR-TYPE TYROSINE-PROTEIN PHOSPHATASE C;
55	e22e-A	06:06:00	03:01:00	90	572	7	PDB	HUMAN:AF-Q14956-F1	TRANSMEMBRANE GLYCOPROTEIN NMB;
56	e12s-A	06:06:00	04:01:00	99	523	10	PDB	HUMAN:AF-Q6XYQ8-F1	SYNAPTOTAGMIN-10;
57	e4hv-A	06:06:00	03:02:00	87	1216	5	PDB	HUMAN:AF-Q16827-F1	RECEPTOR-TYPE TYROSINE-PROTEIN PHOSPHATASE O;
58	few3-A	06:06:00	03:07:00	99	850	5	PDB	HUMAN:AF-Q15283-F1	RAS GTPASE-ACTIVATING PROTEIN 2;
59	e9em-A	06:05:00	03:01:00	86	504	9	PDB	HUMAN:AF-P78324-F1	TYROSINE-PROTEIN PHOSPHATASE NON-RECEPTOR TYPE SU
60	e0xu-A	06:05:00	03:08:00	94	1692	5	PDB	HUMAN:AF-Q86UR5-F1	REGULATING SYNAPTIC MEMBRANE EXOCYTOSIS PROTEIN 1
61	ez07-A	06:05:00	03:05:00	84	1400	5	PDB	HUMAN:AF-P22105-F1	2 TENASCIN-X;
62	e2d1-A	06:05:00	04:02:00	99	422	13	PDB	HUMAN:AF-P21579-F1	SYNAPTOTAGMIN-1;
63	fclw-A	06:05:00	04:00:00	85	1400	5	PDB	HUMAN:AF-P22105-F1	4 TENASCIN-X;
64	fgnv-A	06:05:00	03:03:00	83	767	6	PDB	HUMAN:AF-P0DP72-F1	V-SET AND IMMUNOGLOBULIN DOMAIN-CONTAINING PROTEI
65	e13g-A	06:05:00	04:02:00	100	921	8	PDB	HUMAN:AF-A0FGR8-F1	EXTENDED SYNAPTOTAGMIN-2;
66	fd44-A	06:05:00	03:07:00	84	1400	4	PDB	HUMAN:AF-P22105-F4	TENASCIN-X;
67	e0oe-A	06:05:00	04:06:00	97	590	9	PDB	HUMAN:AF-Q9BQG1-F1	SYNAPTOTAGMIN-3;
68	fgpc-A	06:05:00	04:00:00	99	474	9	PDB	HUMAN:AF-Q9BSW7-F1	SYNAPTOTAGMIN-17;
69	fca4-A	06:05:00	03:06:00	87	1400	5	PDB	HUMAN:AF-P22105-F2	TENASCIN-X;
70	ffo9-A	06:05:00	03:06:00	80	1400	8	PDB	HUMAN:AF-P98161-F4	POLYCYSTIN-1;
71	e3yt-A	06:04:00	04:01:00	98	671	9	PDB	HUMAN:AF-Q96C24-F1	SYNAPTOTAGMIN-LIKE PROTEIN 4;
72	e2wx-A	06:04:00	03:04:00	91	697	7	PDB	HUMAN:AF-Q96LC7-F1	SIALIC ACID-BINDING IG-LIKE LECTIN 10;
73	e8qw-A	06:04:00	04:02:00	86	1150	5	PDB	HUMAN:AF-Q2VWP7-F1	PROTOGENIN;
74	e1f8-A	06:04:00	04:02:00	101	694	9	PDB	HUMAN:AF-Q9Y2J0-F1	RABPHILIN-3A;
75	fbs0-A	06:04:00	04:01:00	83	1400	5	PDB	HUMAN:AF-P22105-F1	TENASCIN-X;
76	e9x7-A	06:04:00	03:05:00	85	1400	9	PDB	HUMAN:AF-O75445-F1	3 USHERIN;
77	e03d-A	06:04:00	03:07:00	85	1400	2	PDB	HUMAN:AF-P22105-F8	TENASCIN-X;
78	ezd6-A	06:04:00	03:03:00	84	708	10	PDB	HUMAN:AF-Q9H3W5-F1	LEUCINE-RICH REPEAT NEURONAL PROTEIN 3;
79	e26w-A	06:04:00	04:06:00	82	1400	10	PDB	HUMAN:AF-Q99715-F2	COLLAGEN ALPHA-1(XII) CHAIN;
80	e4e5-A	06:04:00	04:09:00	82	1400	10	PDB	HUMAN:AF-Q99715-F1	COLLAGEN ALPHA-1(XII) CHAIN;
81	fedr-A	06:04:00	03:09:00	82	1400	5	PDB	HUMAN:AF-Q99715-F5	COLLAGEN ALPHA-1(XII) CHAIN;
82	ezy3-A	06:04:00	03:02:00	84	540	11	PDB	HUMAN:AF-Q8N0Z9-F1	V-SET AND IMMUNOGLOBULIN DOMAIN-CONTAINING PROTEI
83	e4mj-A	06:04:00	03:04:00	80	1400	4	PDB	HUMAN:AF-P98161-F1	POLYCYSTIN-1;
84	e7c9-A	06:04:00	04:00:00	88	289	6	PDB	HUMAN:AF-Q96A28-F1	SLAM FAMILY MEMBER 9;
85	e3rd-A	06:04:00	03:01:00	82	1168	6	PDB	HUMAN:AF-Q8WY21-F1	VPS10 DOMAIN-CONTAINING RECEPTOR SORCS1;
86	e653-A	06:04:00	03:04:00	98	517	5	PDB	HUMAN:AF-Q9UBG7-F1	RECOMBINING BINDING PROTEIN SUPPRESSOR OF HAIRLES
87	e8wd-A	06:04:00	03:05:00	89	1796	6	PDB	HUMAN:AF-Q05707-F1	COLLAGEN ALPHA-1(XIV) CHAIN;
88	fbbh-A	06:04:00	03:09:00	92	1165	5	PDB	HUMAN:AF-P48357-F1	LEPTIN RECEPTOR;
89	fdy3-A	06:04:00	03:02:00	83	1997	4	PDB	HUMAN:AF-P23467-F1	RECEPTOR-TYPE TYROSINE-PROTEIN PHOSPHATASE BETA;
90	ezmw-A	06:04:00	03:06:00	88	335	8	PDB	HUMAN:AF-Q9NQ25-F1	SLAM FAMILY MEMBER 7;
91	fa95-A	06:03:00	05:01:00	93	1413	2	PDB	HUMAN:AF-Q8TER0-F1	SUSHI, NIDOGEN AND EGF-LIKE DOMAIN-CONTAINING PRO
92	e39n-A	06:03:00	03:09:00	87	655	11	PDB	HUMAN:AF-Q9HBG7-F1	T-LYMPHOCYTE SURFACE ANTIGEN LY-9;
93	e3i7-A	06:03:00	04:02:00	89	897	7	PDB	HUMAN:AF-P32927-F1	CYTOKINE RECEPTOR COMMON SUBUNIT BETA;
94	e2hq-A	06:03:00	04:00:00	96	2214	8	PDB	HUMAN:AF-Q8NB66-F1	PROTEIN UNC-13 HOMOLOG C;
95	e206-A	06:03:00	03:06:00	84	1400	7	PDB	HUMAN:AF-O75445-F1	5 USHERIN;
96	fdlt-A	06:03:00	03:09:00	83	1400	5	PDB	HUMAN:AF-Q99715-F7	COLLAGEN ALPHA-1(XII) CHAIN;
97	e4jl-A	06:03:00	03:09:00	85	483	4	PDB	HUMAN:AF-Q8N149-F1	LEUKOCYTE IMMUNOGLOBULIN-LIKE RECEPTOR SUBFAMILY
98	e2yz-A	06:03:00	04:06:00	85	1400	11	PDB	HUMAN:AF-Q99715-F3	COLLAGEN ALPHA-1(XII) CHAIN;
99	e73m-A	06:03:00	03:00:00	90	146	7	PDB	HUMAN:AF-P12273-F1	PROLACTIN-INDUCIBLE PROTEIN;
100	fc2a-A	06:03:00	03:09:00	87	1386	3	PDB	HUMAN:AF-Q96MS0-F1	ROUNDABOUT HOMOLOG 3;
101	ez3z-A	06:03:00	03:01:00	84	713	4	PDB	HUMAN:AF-O75325-F1	LEUCINE-RICH REPEAT NEURONAL PROTEIN 2;
102	e1pq-A	06:03:00	03:07:00	83	1400	2	PDB	HUMAN:AF-P22105-F1	0 TENASCIN-X;
103	e88k-A	06:03:00	04:02:00	98	1104	6	PDB	HUMAN:AF-Q9BSJ8-F1	EXTENDED SYNAPTOTAGMIN-1;
104	e6mu-A	06:03:00	03:03:00	84	345	11	PDB	HUMAN:AF-Q9UIB8-F1	SLAM FAMILY MEMBER 5;
105	e3ba-A	06:03:00	03:03:00	86	332	9	PDB	HUMAN:AF-Q96DU3-F1	SLAM FAMILY MEMBER 6;
106	fdw0-A	06:03:00	03:06:00	83	1400	2	PDB	HUMAN:AF-P22105-F1	5 TENASCIN-X;
107	e5sa-A	06:03:00	04:00:00	84	1244	2	PDB	HUMAN:AF-P22105-F1	6 TENASCIN-X;
108	e86t-A	06:03:00	03:07:00	82	1400	5	PDB	HUMAN:AF-Q99715-F4	COLLAGEN ALPHA-1(XII) CHAIN;
109	fc2h-A	06:02:00	03:05:00	88	459	14	PDB	HUMAN:AF-P16871-F1	INTERLEUKIN-7 RECEPTOR SUBUNIT ALPHA;
110	fcn8-A	06:02:00	03:03:00	83	998	2	PDB	HUMAN:AF-O75369-F1
111	e04p-A	06:02:00	03:05:00	91	817	3	PDB	HUMAN:AF-P22735-F1	PROTEIN-GLUTAMINE GAMMA-GLUTAMYLTRANSFERASE K;
112	fe6f-A	06:02:00	04:02:00	97	1634	11	PDB	HUMAN:AF-O00750-F1	PHOSPHATIDYLINOSITOL 4-PHOSPHATE 3-KINASE C2 DOMA
113	e5kh-A	06:02:00	04:00:00	89	825	9	PDB	HUMAN:AF-P24394-F1	INTERLEUKIN-4 RECEPTOR SUBUNIT ALPHA;
114	fa8b-A	06:02:00	03:02:00	84	1400	7	PDB	HUMAN:AF-O75445-F1	4 USHERIN;
115	e4q9-A	06:02:00	04:05:00	99	1400	7	PDB	HUMAN:AF-Q9Y6V0-F1	9 PROTEIN PICCOLO;
116	e71e-A	06:02:00	03:02:00	84	426	5	PDB	HUMAN:AF-Q00887-F1	PREGNANCY-SPECIFIC BETA-1-GLYCOPROTEIN 9;
117	fcfi-A	06:02:00	03:08:00	89	687	10	PDB	HUMAN:AF-P21980-F1	PROTEIN-GLUTAMINE GAMMA-GLUTAMYLTRANSFERASE 2;
118	e9d4-A	06:02:00	04:06:00	88	380	7	PDB	HUMAN:AF-Q14627-F1	INTERLEUKIN-13 RECEPTOR SUBUNIT ALPHA-2;
119	e1yd-A	06:02:00	03:02:00	83	435	1	PDB	HUMAN:AF-Q00889-F1	PREGNANCY-SPECIFIC BETA-1-GLYCOPROTEIN 6;
120	fd9i-A	06:02:00	03:02:00	89	1400	1	PDB	HUMAN:AF-P22105-F1	1 TENASCIN-X;
121	e5y7-A	06:02:00	03:07:00	84	1400	5	PDB	HUMAN:AF-P22105-F1	3 TENASCIN-X;
122	e8ee-A	06:02:00	04:01:00	88	369	6	PDB	HUMAN:AF-P31785-F1	CYTOKINE RECEPTOR COMMON SUBUNIT GAMMA;
123	e2g1-A	06:02:00	04:01:00	97	886	9	PDB	HUMAN:AF-A0FGR9-F1	EXTENDED SYNAPTOTAGMIN-3;
124	e2ho-A	06:02:00	03:08:00	83	2214	5	PDB	HUMAN:AF-Q92673-F1	SORTILIN-RELATED RECEPTOR;
125	fcvl-A	06:02:00	03:05:00	85	311	6	PDB	HUMAN:AF-Q16473-F1	PUTATIVE TENASCIN-XA;
126	fgug-A	06:02:00	03:08:00	85	1400	7	PDB	HUMAN:AF-Q99715-F9	COLLAGEN ALPHA-1(XII) CHAIN;
127	e0oz-A	06:01:00	04:01:00	84	1912	5	PDB	HUMAN:AF-P23468-F1	RECEPTOR-TYPE TYROSINE-PROTEIN PHOSPHATASE DELTA;
128	e3c9-A	06:01:00	03:09:00	88	662	3	PDB	HUMAN:AF-P42701-F1	INTERLEUKIN-12 RECEPTOR SUBUNIT BETA-1;
129	e5mh-A	06:01:00	03:06:00	86	1400	8	PDB	HUMAN:AF-O75445-F1	7 USHERIN;
130	e0nt-A	06:01:00	03:06:00	86	426	1	PDB	HUMAN:AF-Q9UQ74-F1	PREGNANCY-SPECIFIC BETA-1-GLYCOPROTEIN 8;
131	e3tf-A	06:01:00	03:08:00	85	1400	4	PDB	HUMAN:AF-P22105-F3	TENASCIN-X;
132	fdmr-A	06:01:00	04:04:00	92	804	7	PDB	HUMAN:AF-O95294-F1	RASGAP-ACTIVATING-LIKE PROTEIN 1;
133	e4kr-A	06:01:00	04:03:00	95	672	6	PDB	HUMAN:AF-P17252-F1	PROTEIN KINASE C ALPHA TYPE;
134	e57h-A	06:01:00	03:08:00	85	1400	2	PDB	HUMAN:AF-Q99715-F6	COLLAGEN ALPHA-1(XII) CHAIN;
135	e8vd-A	06:01:00	03:08:00	86	693	9	PDB	HUMAN:AF-Q08188-F1	PROTEIN-GLUTAMINE GAMMA-GLUTAMYLTRANSFERASE E;
136	e9mt-A	06:01:00	03:04:00	92	698	5	PDB	HUMAN:AF-Q96RL6-F1	SIALIC ACID-BINDING IG-LIKE LECTIN 11;
137	e4v2-A	06:01:00	03:04:00	86	1400	3	PDB	HUMAN:AF-P22105-F5	TENASCIN-X;
138	e0pi-A	06:01:00	04:02:00	88	508	8	PDB	HUMAN:AF-Q96LA5-F1	FC RECEPTOR-LIKE PROTEIN 2;
139	e11e-A	06:01:00	03:06:00	83	1299	4	PDB	HUMAN:AF-Q9UQP3-F1	TENASCIN-N;
140	e9ab-A	06:01:00	03:06:00	84	1400	10	PDB	HUMAN:AF-O75445-F1	8 USHERIN;
141	e41x-A	06:01:00	04:01:00	92	1342	5	PDB	HUMAN:AF-Q9Y6V0-F2	0 PROTEIN PICCOLO;
142	e1q6-A	06:01:00	03:05:00	90	739	6	PDB	HUMAN:AF-P19320-F1	VASCULAR CELL ADHESION PROTEIN 1;
143	ezmu-A	06:01:00	03:09:00	82	400	7	PDB	HUMAN:AF-P15509-F1	GRANULOCYTE-MACROPHAGE COLONY-STIMULATING FACTOR
144	e1sc-A	06:01:00	03:01:00	82	1822	5	PDB	HUMAN:AF-P16144-F1	INTEGRIN BETA-4;
145	e49r-A	06:01:00	03:07:00	79	1400	9	PDB	HUMAN:AF-P98161-F3	POLYCYSTIN-1;
146	e6rs-A	06:00:00	03:02:00	86	297	8	PDB	HUMAN:AF-O14972-F1	VACUOLAR PROTEIN SORTING-ASSOCIATED PROTEIN 26C;
147	ezxx-A	06:00:00	03:09:00	94	308	4	PDB	HUMAN:AF-Q9UJD0-F1	REGULATING SYNAPTIC MEMBRANE EXOCYTOSIS PROTEIN 3
148	fe2l-A	06:00:00	03:00:00	90	499	8	PDB	HUMAN:AF-Q9NYZ4-F1	SIALIC ACID-BINDING IG-LIKE LECTIN 8;
149	fgx3-A	06:00:00	03:06:00	89	738	6	PDB	HUMAN:AF-P16284-F1	PLATELET ENDOTHELIAL CELL ADHESION MOLECULE;
150	fcyf-A	06:00:00	04:03:00	90	489	9	PDB	HUMAN:AF-P15260-F1	INTERFERON GAMMA RECEPTOR 1;
151	eza7-A	06:00:00	03:09:00	85	152	4	PDB	HUMAN:AF-Q6ISS4-F1	LEUKOCYTE-ASSOCIATED IMMUNOGLOBULIN-LIKE RECEPTOR
152	e59o-A	06:00:00	03:05:00	84	335	1	PDB	HUMAN:AF-P11465-F1	PREGNANCY-SPECIFIC BETA-1-GLYCOPROTEIN 2;
153	e5f1-A	06:00:00	03:09:00	85	1400	2	PDB	HUMAN:AF-Q99715-F8	COLLAGEN ALPHA-1(XII) CHAIN;
154	e4ot-A	06:00:00	03:07:00	86	335	1	PDB	HUMAN:AF-Q15238-F1	PREGNANCY-SPECIFIC BETA-1-GLYCOPROTEIN 5;
155	e7m8-A	06:00:00	03:03:00	84	419	1	PDB	HUMAN:AF-Q13046-F1	PUTATIVE PREGNANCY-SPECIFIC BETA-1-GLYCOPROTEIN 7
156	e1i9-A	06:00:00	03:07:00	93	671	9	PDB	HUMAN:AF-P05771-F1	PROTEIN KINASE C BETA TYPE;
157	e4a1-A	06:00:00	04:05:00	82	212	9	PDB	HUMAN:AF-Q8NAU1-F1	FIBRONECTIN TYPE III DOMAIN-CONTAINING PROTEIN 5;
158	ezyg-A	06:00:00	04:01:00	79	1400	4	PDB	HUMAN:AF-Q02388-F4	COLLAGEN ALPHA-1(VII) CHAIN;
159	e57s-A	06:00:00	03:07:00	83	1347	4	PDB	HUMAN:AF-O94856-F1	NEUROFASCIN;
160	e485-A	06:00:00	04:02:00	100	1591	10	PDB	HUMAN:AF-O14795-F1	PROTEIN UNC-13 HOMOLOG B;
161	e4rb-A	06:00:00	04:02:00	91	1445	11	PDB	HUMAN:AF-Q6YHK3-F1	CD109 ANTIGEN;
162	ffo4-A	06:00:00	04:09:00	87	1907	3	PDB	HUMAN:AF-P10586-F1	RECEPTOR-TYPE TYROSINE-PROTEIN PHOSPHATASE F;
163	fa22-A	06:00:00	04:00:00	84	837	10	PDB	HUMAN:AF-O15394-F1	NEURAL CELL ADHESION MOLECULE 2;
164	e8so-A	05:09:00	04:02:00	93	265	11	PDB	HUMAN:AF-Q6UX52-F1	PROTEIN IL-40;
165	e6ku-A	05:09:00	03:09:00	86	328	2	PDB	HUMAN:AF-P29460-F1	INTERLEUKIN-12 SUBUNIT BETA;
166	fg3a-A	05:09:00	04:09:00	89	1378	3	PDB	HUMAN:AF-Q9HCK4-F1	ROUNDABOUT HOMOLOG 2;
167	e8k3-A	05:09:00	03:08:00	90	521	9	PDB	HUMAN:AF-Q01113-F1	INTERLEUKIN-9 RECEPTOR;
168	ez2r-A	05:09:00	03:07:00	93	1703	10	PDB	HUMAN:AF-Q9UPW8-F1	PROTEIN UNC-13 HOMOLOG A;
169	e66b-A	05:09:00	03:07:00	87	1304	3	PDB	HUMAN:AF-Q92823-F1	NEURONAL CELL ADHESION MOLECULE;
170	e64z-A	05:09:00	03:00:00	81	1400	7	PDB	HUMAN:AF-O75445-F1	9 USHERIN;
171	e28k-A	05:09:00	03:09:00	84	1263	6	PDB	HUMAN:AF-Q99715-F1	0 COLLAGEN ALPHA-1(XII) CHAIN;
172	e8dw-A	05:09:00	03:00:00	87	467	10	PDB	HUMAN:AF-Q9Y286-F1	SIALIC ACID-BINDING IG-LIKE LECTIN 7;
173	e6i9-A	05:09:00	03:06:00	86	428	1	PDB	HUMAN:AF-Q16557-F1	PREGNANCY-SPECIFIC BETA-1-GLYCOPROTEIN 3;
174	e4e9-A	05:09:00	03:09:00	87	336	1	PDB	HUMAN:AF-Q6ZVW7-F1	PUTATIVE INTERLEUKIN-17 RECEPTOR E-LIKE;
175	fgxo-A	05:09:00	03:08:00	86	325	7	PDB	HUMAN:AF-Q08334-F1	INTERLEUKIN-10 RECEPTOR SUBUNIT BETA;
176	fa7r-A	05:09:00	03:05:00	80	515	8	PDB	HUMAN:AF-Q96PJ5-F1	FC RECEPTOR-LIKE PROTEIN 4;
177	e6p2-A	05:09:00	03:08:00	86	285	10	PDB	HUMAN:AF-Q9P0V8-F1	SLAM FAMILY MEMBER 8;
178	e34m-A	05:09:00	03:04:00	85	2213	4	PDB	HUMAN:AF-Q7Z5N4-F1	PROTEIN SIDEKICK-1;
179	e397-A	05:09:00	03:08:00	85	590	1	PDB	HUMAN:AF-O75023-F1	LEUKOCYTE IMMUNOGLOBULIN-LIKE RECEPTOR SUBFAMILY
180	fctr-A	05:09:00	04:02:00	85	734	2	PDB	HUMAN:AF-Q96P31-F1	FC RECEPTOR-LIKE PROTEIN 3;
181	e6v3-A	05:09:00	03:09:00	84	858	6	PDB	HUMAN:AF-P13591-F1	NEURAL CELL ADHESION MOLECULE 1;
182	e18n-A	05:09:00	04:02:00	84	335	8	PDB	HUMAN:AF-Q13291-F1	SIGNALING LYMPHOCYTIC ACTIVATION MOLECULE;
183	fbij-A	05:09:00	04:01:00	83	1358	0	PDB	HUMAN:AF-Q92752-F1	TENASCIN-R;
184	e5an-A	05:09:00	03:07:00	88	420	10	PDB	HUMAN:AF-Q01344-F1	INTERLEUKIN-5 RECEPTOR SUBUNIT ALPHA;
185	fdfb-A	05:09:00	03:01:00	88	453	10	PDB	HUMAN:AF-O43699-F1	SIALIC ACID-BINDING IG-LIKE LECTIN 6;
186	e08z-A	05:09:00	04:05:00	82	1040	6	PDB	HUMAN:AF-Q02246-F1	CONTACTIN-2;
187	e9tb-A	05:08:00	04:05:00	86	235	6	PDB	HUMAN:AF-A0A376A8Z	9-F1 KIR2DS5 PROTEIN;
188	e1ac-A	05:08:00	03:07:00	86	691	6	PDB	HUMAN:AF-P16452-F1	PROTEIN 4.2;
189	fgak-A	05:08:00	04:01:00	95	697	8	PDB	HUMAN:AF-P05129-F1	PROTEIN KINASE C GAMMA TYPE;
190	e7rt-A	05:08:00	04:01:00	85	771	6	PDB	HUMAN:AF-Q9P244-F1	LEUCINE-RICH REPEAT AND FIBRONECTIN TYPE III DOMA
191	e0wn-A	05:08:00	03:07:00	89	353	7	PDB	HUMAN:AF-B7Z1M9-F1	C2 CALCIUM-DEPENDENT DOMAIN-CONTAINING PROTEIN 4D
192	e0np-A	05:08:00	03:06:00	94	1250	4	PDB	HUMAN:AF-Q8TDY8-F1	IMMUNOGLOBULIN SUPERFAMILY DCC SUBCLASS MEMBER 4;
193	e7vn-A	05:08:00	03:01:00	90	661	6	PDB	HUMAN:AF-P40967-F1	MELANOCYTE PROTEIN PMEL;
194	fco8-A	05:08:00	04:06:00	88	1337	9	PDB	HUMAN:AF-Q12913-F1	RECEPTOR-TYPE TYROSINE-PROTEIN PHOSPHATASE ETA;
195	fghc-A	05:08:00	03:07:00	84	1400	4	PDB	HUMAN:AF-O75445-F1	USHERIN;
196	e2ue-A	05:08:00	04:02:00	92	956	10	PDB	HUMAN:AF-Q7Z553-F1	MAM DOMAIN-CONTAINING GLYCOSYLPHOSPHATIDYLINOSITO
197	e9q7-A	05:08:00	03:09:00	85	1222	7	PDB	HUMAN:AF-Q9UPU3-F1	VPS10 DOMAIN-CONTAINING RECEPTOR SORCS3;
198	e02v-A	05:08:00	03:05:00	85	429	8	PDB	HUMAN:AF-Q96LA6-F1	FC RECEPTOR-LIKE PROTEIN 1;
199	e0lv-A	05:08:00	03:09:00	83	1284	10	PDB	HUMAN:AF-Q9P218-F1	COLLAGEN ALPHA-1(XX) CHAIN;
200	fcd3-A	05:08:00	03:09:00	85	631	2	PDB	HUMAN:AF-O75022-F1	LEUKOCYTE IMMUNOGLOBULIN-LIKE RECEPTOR SUBFAMILY
201	ff5i-A	05:08:00	03:07:00	85	706	6	PDB	HUMAN:AF-O95932-F1	PROTEIN-GLUTAMINE GAMMA-GLUTAMYLTRANSFERASE 6;
202	fbon-A	05:08:00	04:02:00	91	918	7	PDB	HUMAN:AF-P40189-F1	INTERLEUKIN-6 RECEPTOR SUBUNIT BETA;
203	e2b0-A	05:08:00	03:02:00	91	720	11	PDB	HUMAN:AF-O43548-F1	PROTEIN-GLUTAMINE GAMMA-GLUTAMYLTRANSFERASE 5;
204	fcue-A	05:08:00	03:07:00	85	1400	4	PDB	HUMAN:AF-O75445-F2	USHERIN;
205	fbms-A	05:08:00	03:07:00	80	1894	10	PDB	HUMAN:AF-Q4ZHG4-F1	FIBRONECTIN TYPE III DOMAIN-CONTAINING PROTEIN 1;
206	ez1y-A	05:08:00	03:05:00	79	733	5	PDB	HUMAN:AF-Q5VTL7-F1	FIBRONECTIN TYPE III DOMAIN-CONTAINING PROTEIN 7;
207	ff7n-A	05:08:00	03:07:00	84	1400	6	PDB	HUMAN:AF-O75445-F1	2 USHERIN;
208	fawz-A	05:07:00	03:00:00	86	551	8	PDB	HUMAN:AF-O15389-F1	SIALIC ACID-BINDING IG-LIKE LECTIN 5;
209	ezye-A	05:07:00	04:04:00	89	1021	4	PDB	HUMAN:AF-O15197-F1	EPHRIN TYPE-B RECEPTOR 6;
210	fgye-A	05:07:00	04:01:00	90	271	13	PDB	HUMAN:AF-Q14773-F1	INTERCELLULAR ADHESION MOLECULE 4;
211	e3j4-A	05:07:00	04:08:00	86	783	5	PDB	HUMAN:AF-Q6ZTA4-F1	TRIPARTITE MOTIF-CONTAINING PROTEIN 67;
212	fdd9-A	05:07:00	03:00:00	73	378	4	PDB	HUMAN:AF-P26951-F1	INTERLEUKIN-3 RECEPTOR SUBUNIT ALPHA;
213	fg1a-A	05:07:00	04:07:00	90	836	3	PDB	HUMAN:AF-Q99062-F1	GRANULOCYTE COLONY-STIMULATING FACTOR RECEPTOR;
214	e81j-A	05:07:00	04:04:00	91	629	7	PDB	HUMAN:AF-Q5VWK5-F1	INTERLEUKIN-23 RECEPTOR;
215	e3mo-A	05:07:00	04:05:00	86	574	6	PDB	HUMAN:AF-Q8N6P7-F1	INTERLEUKIN-22 RECEPTOR SUBUNIT ALPHA-1;
216	fcgx-A	05:07:00	03:00:00	80	224	3	PDB	HUMAN:AF-Q8TBE3-F1	FIBRONECTIN TYPE III DOMAIN-CONTAINING PROTEIN 9;
217	fej7-A	05:07:00	03:04:00	83	300	12	PDB	HUMAN:AF-Q7Z692-F1	CARCINOEMBRYONIC ANTIGEN-RELATED CELL ADHESION MO
218	fd7y-A	05:07:00	03:05:00	85	481	4	PDB	HUMAN:AF-Q6PI73-F1	LEUKOCYTE IMMUNOGLOBULIN-LIKE RECEPTOR SUBFAMILY
219	fbcg-A	05:07:00	03:03:00	87	396	9	PDB	HUMAN:AF-Q08ET2-F1	SIALIC ACID-BINDING IG-LIKE LECTIN 14;
220	fdgb-A	05:07:00	04:04:00	86	304	6	PDB	HUMAN:AF-A0A0G2JLQ	3-F1 KILLER CELL IMMUNOGLOBULIN-LIKE RECEPTOR;
221	e589-A	05:07:00	04:04:00	86	304	6	PDB	HUMAN:AF-Q14953-F1	KILLER CELL IMMUNOGLOBULIN-LIKE RECEPTOR 2DS5;
222	eznc-A	05:07:00	03:08:00	81	375	4	PDB	HUMAN:AF-Q8NHK3-F1	KILLER CELL IMMUNOGLOBULIN-LIKE RECEPTOR 2DL5B;
223	e9vr-A	05:07:00	03:07:00	85	335	1	PDB	HUMAN:AF-Q9UQ72-F1	PREGNANCY-SPECIFIC BETA-1-GLYCOPROTEIN 11;
224	e5uz-A	05:07:00	03:06:00	87	887	5	PDB	HUMAN:AF-Q3SYG4-F1	PROTEIN PTHB1;
225	ffmx-A	05:07:00	04:06:00	83	1461	5	PDB	HUMAN:AF-Q92859-F1	NEOGENIN;
226	fcs7-A	05:07:00	03:07:00	87	867	6	PDB	HUMAN:AF-Q86VR7-F1	V-SET AND IMMUNOGLOBULIN DOMAIN-CONTAINING PROTEI
227	e4d2-A	05:07:00	02:07:00	81	547	9	PDB	HUMAN:AF-P32942-F1	INTERCELLULAR ADHESION MOLECULE 3;
228	e8of-A	05:07:00	03:06:00	87	721	7	PDB	HUMAN:AF-Q9BXC9-F1	BARDET-BIEDL SYNDROME 2 PROTEIN;
229	ezd1-A	05:07:00	03:08:00	84	499	4	PDB	HUMAN:AF-P59901-F1	LEUKOCYTE IMMUNOGLOBULIN-LIKE RECEPTOR SUBFAMILY
230	fc3c-A	05:07:00	04:01:00	92	295	9	PDB	HUMAN:AF-P13726-F1	TISSUE FACTOR;
231	e24b-A	05:07:00	04:02:00	83	635	1	PDB	HUMAN:AF-Q6PJG9-F1	LEUCINE-RICH REPEAT AND FIBRONECTIN TYPE-III DOMA
232	e1cg-A	05:06:00	02:08:00	80	583	8	PDB	HUMAN:AF-Q13740-F1	CD166 ANTIGEN;
233	fa8y-A	05:06:00	03:07:00	86	431	5	PDB	HUMAN:AF-Q5DX21-F1	IMMUNOGLOBULIN SUPERFAMILY MEMBER 11;
234	e3za-A	05:06:00	03:08:00	81	377	5	PDB	HUMAN:AF-Q99706-F1	KILLER CELL IMMUNOGLOBULIN-LIKE RECEPTOR 2DL4;
235	e713-A	05:06:00	03:09:00	100	490	7	PDB	HUMAN:AF-Q8N9U0-F1	TANDEM C2 DOMAINS NUCLEAR PROTEIN;
236	e4s8-A	05:06:00	03:04:00	83	1159	5	PDB	HUMAN:AF-Q96PQ0-F1	VPS10 DOMAIN-CONTAINING RECEPTOR SORCS2;
237	ez5m-A	05:06:00	03:07:00	89	551	4	PDB	HUMAN:AF-P14784-F1	INTERLEUKIN-2 RECEPTOR SUBUNIT BETA;
238	e8wg-A	05:06:00	03:03:00	83	244	2	PDB	HUMAN:AF-Q495A1-F1	T-CELL IMMUNORECEPTOR WITH IG AND ITIM DOMAINS;
239	fcxe-A	05:06:00	04:00:00	85	287	5	PDB	HUMAN:AF-Q6GTX8-F1	LEUKOCYTE-ASSOCIATED IMMUNOGLOBULIN-LIKE RECEPTOR
240	e3r9-A	05:06:00	04:00:00	83	890	8	PDB	HUMAN:AF-Q06418-F1	TYROSINE-PROTEIN KINASE RECEPTOR TYRO3;
241	e1h1-A	05:06:00	03:09:00	84	660	1	PDB	HUMAN:AF-O43155-F1	LEUCINE-RICH REPEAT TRANSMEMBRANE PROTEIN FLRT2;
242	e7do-A	05:06:00	03:07:00	87	2172	9	PDB	HUMAN:AF-Q58EX2-F1	PROTEIN SIDEKICK-2;
243	e3xa-A	05:06:00	04:05:00	86	234	7	PDB	HUMAN:AF-Q9H6D8-F1	FIBRONECTIN TYPE III DOMAIN-CONTAINING PROTEIN 4;
244	feqx-A	05:06:00	03:07:00	81	285	2	PDB	HUMAN:AF-A6NLU5-F1	V-SET AND TRANSMEMBRANE DOMAIN-CONTAINING PROTEIN
245	e73n-A	05:06:00	03:05:00	84	1445	5	PDB	HUMAN:AF-P23470-F1	RECEPTOR-TYPE TYROSINE-PROTEIN PHOSPHATASE GAMMA;
246	fgii-A	05:06:00	04:06:00	87	198	9	PDB	HUMAN:AF-A0A1W2PQF	6-F1 UNCHARACTERIZED PROTEIN;
247	e2fl-A	05:06:00	06:05:00	82	297	4	PDB	HUMAN:AF-A0A0G2JQ4	7-F1 UNCHARACTERIZED PROTEIN;
248	e6ip-A	05:06:00	06:05:00	82	348	4	PDB	HUMAN:AF-P43626-F1	KILLER CELL IMMUNOGLOBULIN-LIKE RECEPTOR 2DL1;
249	e073-A	05:06:00	06:05:00	82	331	4	PDB	HUMAN:AF-A0A5K1VDZ	0-F1 KIR2DL1 PROTEIN;
250	e17n-A	05:06:00	04:03:00	83	304	6	PDB	HUMAN:AF-P43631-F1	KILLER CELL IMMUNOGLOBULIN-LIKE RECEPTOR 2DS2;
251	ff62-A	05:06:00	03:09:00	81	489	9	PDB	HUMAN:AF-O75019-F1	LEUKOCYTE IMMUNOGLOBULIN-LIKE RECEPTOR SUBFAMILY
252	e9at-A	05:06:00	03:08:00	81	375	4	PDB	HUMAN:AF-Q8N109-F1	KILLER CELL IMMUNOGLOBULIN-LIKE RECEPTOR 2DL5A;
253	e355-A	05:06:00	05:05:00	82	410	5	PDB	HUMAN:AF-Q8N743-F1	KILLER CELL IMMUNOGLOBULIN-LIKE RECEPTOR 3DL3;
254	e885-A	05:06:00	03:08:00	81	375	4	PDB	HUMAN:AF-A0A0G2JPC	4-F1 KILLER CELL IMMUNOGLOBULIN-LIKE RECEPTOR;
255	e9j8-A	05:06:00	03:08:00	81	444	2	PDB	HUMAN:AF-P43629-F1	KILLER CELL IMMUNOGLOBULIN-LIKE RECEPTOR 3DL1;
256	e1m9-A	05:06:00	03:08:00	81	199	7	PDB	HUMAN:AF-A0A1W2PRS	3-F1 UNCHARACTERIZED PROTEIN;
257	fchc-A	05:06:00	03:09:00	82	304	5	PDB	HUMAN:AF-P43632-F1	KILLER CELL IMMUNOGLOBULIN-LIKE RECEPTOR 2DS4;
258	e4vb-A	05:06:00	05:06:00	82	382	2	PDB	HUMAN:AF-Q14943-F1	KILLER CELL IMMUNOGLOBULIN-LIKE RECEPTOR 3DS1;
259	fe49-A	05:06:00	04:04:00	82	352	9	PDB	HUMAN:AF-Q9H7L2-F1	PUTATIVE KILLER CELL IMMUNOGLOBULIN-LIKE RECEPTOR
260	e9zl-A	05:06:00	04:01:00	84	1007	4	PDB	HUMAN:AF-Q8WZ75-F1	ROUNDABOUT HOMOLOG 4;
261	e3eo-A	05:06:00	05:04:00	84	1028	12	PDB	HUMAN:AF-Q9UQ52-F1	CONTACTIN-6;
262	fesf-A	05:06:00	03:06:00	91	369	9	PDB	HUMAN:AF-Q8NCU7-F1	C2 CALCIUM-DEPENDENT DOMAIN-CONTAINING PROTEIN 4A
263	e4k1-A	05:06:00	03:09:00	82	1400	6	PDB	HUMAN:AF-O75445-F1	1 USHERIN;
264	e64i-A	05:06:00	03:00:00	81	626	4	PDB	HUMAN:AF-P20916-F1	MYELIN-ASSOCIATED GLYCOPROTEIN;
265	e5fm-A	05:06:00	03:02:00	79	866	1	PDB	HUMAN:AF-Q96F46-F1	INTERLEUKIN-17 RECEPTOR A;
266	ezwh-A	05:06:00	03:00:00	80	1400	8	PDB	HUMAN:AF-O75445-F2	0 USHERIN;
267	e0fj-A	05:06:00	03:09:00	84	448	2	PDB	HUMAN:AF-Q8NHJ6-F1	LEUKOCYTE IMMUNOGLOBULIN-LIKE RECEPTOR SUBFAMILY
268	ffw9-A	05:06:00	02:07:00	80	924	9	PDB	HUMAN:AF-Q9UMF0-F1	INTERCELLULAR ADHESION MOLECULE 5;
269	fd4w-A	05:06:00	03:02:00	80	445	4	PDB	HUMAN:AF-Q6PCB0-F1	VON WILLEBRAND FACTOR A DOMAIN-CONTAINING PROTEIN
270	fb9d-A	05:06:00	04:01:00	84	1297	2	PDB	HUMAN:AF-P14616-F1	INSULIN RECEPTOR-RELATED PROTEIN;
271	e7pw-A	05:06:00	03:09:00	79	1400	8	PDB	HUMAN:AF-Q8WZ42-F1	05 TITIN;
272	fgjq-A	05:06:00	03:08:00	82	735	6	PDB	HUMAN:AF-Q9UJV3-F1	PROBABLE E3 UBIQUITIN-PROTEIN LIGASE MID2;
273	ffe8-A	05:06:00	04:00:00	94	1411	6	PDB	HUMAN:AF-Q9UQ26-F1	REGULATING SYNAPTIC MEMBRANE EXOCYTOSIS PROTEIN 2
274	e5w7-A	05:06:00	03:08:00	82	894	4	PDB	HUMAN:AF-P30530-F1	TYROSINE-PROTEIN KINASE RECEPTOR UFO;
275	fbqt-A	05:06:00	03:00:00	79	778	14	PDB	HUMAN:AF-Q8IZU9-F1	KIN OF IRRE-LIKE PROTEIN 3;
276	e3vc-A	05:06:00	03:07:00	76	1400	7	PDB	HUMAN:AF-P98161-F2	POLYCYSTIN-1;
277	e2vv-A	05:06:00	03:09:00	82	1336	5	PDB	HUMAN:AF-Q8N6C5-F1	IMMUNOGLOBULIN SUPERFAMILY MEMBER 1;
278	e3er-A	05:06:00	03:04:00	87	391	8	PDB	HUMAN:AF-Q9H3M7-F1	THIOREDOXIN-INTERACTING PROTEIN;
279	e3p9-A	05:05:00	03:03:00	87	181	8	PDB	HUMAN:AF-O95971-F1	CD160 ANTIGEN;
280	e6z3-A	05:05:00	03:06:00	88	434	7	PDB	HUMAN:AF-Q6DN72-F1	FC RECEPTOR-LIKE PROTEIN 6;
281	e3lm-A	05:05:00	03:03:00	85	359	6	PDB	HUMAN:AF-Q7L513-F1	FC RECEPTOR-LIKE A;
282	e3xn-A	05:05:00	03:07:00	88	421	6	PDB	HUMAN:AF-Q8TF44-F1	C2 CALCIUM-DEPENDENT DOMAIN-CONTAINING PROTEIN 4C
283	e5t4-A	05:05:00	03:03:00	86	433	6	PDB	HUMAN:AF-Q8N5I2-F1	ARRESTIN DOMAIN-CONTAINING PROTEIN 1;
284	fap0-A	05:05:00	04:03:00	83	299	2	PDB	HUMAN:AF-A6NI73-F1	LEUKOCYTE IMMUNOGLOBULIN-LIKE RECEPTOR SUBFAMILY
285	fg5q-A	05:05:00	04:01:00	90	1651	7	PDB	HUMAN:AF-Q9Y6N7-F1	ROUNDABOUT HOMOLOG 1;
286	fg8l-A	05:05:00	03:07:00	83	244	6	PDB	HUMAN:AF-O75871-F1	CARCINOEMBRYONIC ANTIGEN-RELATED CELL ADHESION MO
287	e167-A	05:05:00	03:09:00	83	425	6	PDB	HUMAN:AF-Q2WEN9-F1	CARCINOEMBRYONIC ANTIGEN-RELATED CELL ADHESION MO
288	fgow-A	05:05:00	04:06:00	93	508	5	PDB	HUMAN:AF-P19235-F1	ERYTHROPOIETIN RECEPTOR;
289	fgtk-A	05:05:00	04:02:00	91	520	8	PDB	HUMAN:AF-Q8IU57-F1	INTERFERON LAMBDA RECEPTOR 1;
290	e8jv-A	05:05:00	03:06:00	83	1446	11	PDB	HUMAN:AF-Q92729-F1	RECEPTOR-TYPE TYROSINE-PROTEIN PHOSPHATASE U;
291	fdci-A	05:05:00	03:07:00	82	650	6	PDB	HUMAN:AF-Q8NHL6-F1	LEUKOCYTE IMMUNOGLOBULIN-LIKE RECEPTOR SUBFAMILY
292	fc9y-A	05:05:00	04:01:00	87	568	8	PDB	HUMAN:AF-Q8TB73-F1	PROTEIN NDNF;
293	e8pu-A	05:05:00	03:08:00	81	349	2	PDB	HUMAN:AF-A0A0G2JNF	4-F1 KILLER CELL IMMUNOGLOBULIN-LIKE RECEPTOR, TWO
294	e3rg-A	05:05:00	04:05:00	86	199	6	PDB	HUMAN:AF-A0A5F9ZH8	8-F1 UNCHARACTERIZED PROTEIN;
295	e0kx-A	05:05:00	03:08:00	81	199	2	PDB	HUMAN:AF-A0A5F9Z9Y	6-F1 KILLER CELL IMMUNOGLOBULIN-LIKE RECEPTOR 2DL2;
296	ezc2-A	05:05:00	04:04:00	86	304	6	PDB	HUMAN:AF-A0A0G2JNG	1-F1 UNCHARACTERIZED PROTEIN;
297	e2bq-A	05:05:00	03:08:00	81	341	2	PDB	HUMAN:AF-P43628-F1	KILLER CELL IMMUNOGLOBULIN-LIKE RECEPTOR 2DL3;
298	eztu-A	05:05:00	04:04:00	85	199	6	PDB	HUMAN:AF-A0A2R8YCY	7-F1 UNCHARACTERIZED PROTEIN;
299	e0vc-A	05:05:00	03:05:00	89	463	9	PDB	HUMAN:AF-Q9Y336-F1	SIALIC ACID-BINDING IG-LIKE LECTIN 9;
300	e2sm-A	05:05:00	03:08:00	81	375	4	PDB	HUMAN:AF-A0A0G2JN6	8-F1 UNCHARACTERIZED PROTEIN;
301	fbu9-A	05:05:00	03:08:00	81	328	5	PDB	HUMAN:AF-A0A0G2JN0	1-F1 KILLER CELL IMMUNOGLOBULIN-LIKE RECEPTOR, THRE
302	e5y1-A	05:05:00	03:09:00	82	360	6	PDB	HUMAN:AF-A0A191URJ	7-F1 KIR2DL PROTEIN;
303	e9hq-A	05:05:00	04:09:00	91	538	5	PDB	HUMAN:AF-Q9HBE5-F1	INTERLEUKIN-21 RECEPTOR;
304	e1su-A	05:05:00	04:00:00	87	1382	6	PDB	HUMAN:AF-P06213-F1	INSULIN RECEPTOR;
305	e7xr-A	05:05:00	03:03:00	81	1709	9	PDB	HUMAN:AF-Q9BZZ2-F1	SIALOADHESIN;
306	e03k-A	05:05:00	04:04:00	84	530	7	PDB	HUMAN:AF-Q9BXM9-F1	FSD1-LIKE PROTEIN;
307	e034-A	05:05:00	03:04:00	82	814	4	PDB	HUMAN:AF-Q8IVU1-F1	IMMUNOGLOBULIN SUPERFAMILY DCC SUBCLASS MEMBER 3;
308	e79e-A	05:05:00	03:08:00	79	1400	8	PDB	HUMAN:AF-Q8WZ42-F1	03 TITIN;
309	e7lb-A	05:05:00	04:07:00	79	1018	6	PDB	HUMAN:AF-Q12860-F1	CONTACTIN-1;
310	e9gf-A	05:05:00	05:04:00	83	1028	13	PDB	HUMAN:AF-Q9P232-F1	CONTACTIN-3;
311	e06w-A	05:05:00	04:08:00	85	1026	4	PDB	HUMAN:AF-Q8IWV2-F1	CONTACTIN-4;
312	e4ce-A	05:05:00	03:06:00	84	311	2	PDB	HUMAN:AF-Q6UXL0-F1	INTERLEUKIN-20 RECEPTOR SUBUNIT BETA;
313	e68k-A	05:05:00	04:04:00	85	1447	7	PDB	HUMAN:AF-P43146-F1	NETRIN RECEPTOR DCC;
314	e01h-A	05:05:00	03:05:00	83	1400	6	PDB	HUMAN:AF-O75445-F1	0 USHERIN;
315	e319-A	05:05:00	03:08:00	82	2315	6	PDB	HUMAN:AF-P23471-F1	RECEPTOR-TYPE TYROSINE-PROTEIN PHOSPHATASE ZETA;
316	e76e-A	05:05:00	06:06:00	81	328	9	PDB	HUMAN:AF-A0A0G2JMM	0-F1 UNCHARACTERIZED PROTEIN;
317	e8nl-A	05:04:00	03:08:00	86	1287	3	PDB	HUMAN:AF-Q4KMG0-F1	CELL ADHESION MOLECULE-RELATED/DOWN-REGULATED BY
318	ff90-A	05:04:00	03:05:00	85	374	8	PDB	HUMAN:AF-P12314-F1	HIGH AFFINITY IMMUNOGLOBULIN GAMMA FC RECEPTOR I;
319	e8lj-A	05:04:00	03:07:00	82	646	5	PDB	HUMAN:AF-P43121-F1	CELL SURFACE GLYCOPROTEIN MUC18;
320	ffvq-A	05:04:00	02:09:00	79	207	6	PDB	HUMAN:AF-Q6UQ28-F1	PLACENTA-EXPRESSED TRANSCRIPT 1 PROTEIN;
321	fg71-A	05:04:00	03:09:00	88	1257	2	PDB	HUMAN:AF-P32004-F1	NEURAL CELL ADHESION MOLECULE L1;
322	fe64-A	05:04:00	03:09:00	89	532	7	PDB	HUMAN:AF-P05362-F1	INTERCELLULAR ADHESION MOLECULE 1;
323	fata-A	05:04:00	03:06:00	83	252	4	PDB	HUMAN:AF-P40198-F1	CARCINOEMBRYONIC ANTIGEN-RELATED CELL ADHESION MO
324	e82k-A	05:04:00	03:09:00	81	439	7	PDB	HUMAN:AF-Q8N6C8-F1	LEUKOCYTE IMMUNOGLOBULIN-LIKE RECEPTOR SUBFAMILY
325	e9j3-A	05:04:00	03:09:00	85	1400	2	PDB	HUMAN:AF-O75445-F1	6 USHERIN;
326	e62p-A	05:04:00	04:01:00	97	250	4	PDB	HUMAN:AF-Q9BVX2-F1	TRANSMEMBRANE PROTEIN 106C;
327	e03u-A	05:04:00	03:09:00	88	781	8	PDB	HUMAN:AF-P0C869-F1	CYTOSOLIC PHOSPHOLIPASE A2 BETA;
328	e4g5-A	05:04:00	03:06:00	80	628	6	PDB	HUMAN:AF-P50895-F1	BASAL CELL ADHESION MOLECULE;
329	e8c1-A	05:04:00	03:07:00	88	710	10	PDB	HUMAN:AF-Q96PF1-F1	PROTEIN-GLUTAMINE GAMMA-GLUTAMYLTRANSFERASE Z;
330	e0sg-A	05:04:00	03:01:00	81	1202	6	PDB	HUMAN:AF-O75445-F2	1 USHERIN;
331	e5l6-A	05:04:00	04:06:00	81	1400	7	PDB	HUMAN:AF-Q8WZ42-F9	9 TITIN;
332	e6i0-A	05:04:00	04:01:00	88	636	3	PDB	HUMAN:AF-Q6UWB1-F1	INTERLEUKIN-27 RECEPTOR SUBUNIT ALPHA;
333	fbv5-A	05:04:00	04:03:00	79	1400	8	PDB	HUMAN:AF-Q8WZ42-F1	01 TITIN;
334	fea9-A	05:04:00	04:09:00	82	1100	5	PDB	HUMAN:AF-O94779-F1	CONTACTIN-5;
335	e38g-A	05:04:00	04:05:00	92	372	7	PDB	HUMAN:AF-P26992-F1	CILIARY NEUROTROPHIC FACTOR RECEPTOR SUBUNIT ALPH
336	e932-A	05:04:00	02:07:00	77	708	13	PDB	HUMAN:AF-Q6UWL6-F1	KIN OF IRRE-LIKE PROTEIN 2;
337	fga4-A	05:04:00	04:00:00	84	1367	1	PDB	HUMAN:AF-P08069-F1	INSULIN-LIKE GROWTH FACTOR 1 RECEPTOR;
338	e900-A	05:04:00	03:00:00	79	977	10	PDB	HUMAN:AF-Q96RD9-F1	FC RECEPTOR-LIKE PROTEIN 5;
339	ffk0-A	05:04:00	03:07:00	82	596	2	PDB	HUMAN:AF-Q6UY09-F1	CARCINOEMBRYONIC ANTIGEN-RELATED CELL ADHESION MO
340	fg5e-A	05:04:00	03:09:00	88	976	8	PDB	HUMAN:AF-P21709-F1	EPHRIN TYPE-A RECEPTOR 1;
341	ezk5-A	05:04:00	04:00:00	85	1400	2	PDB	HUMAN:AF-Q02388-F5	COLLAGEN ALPHA-1(VII) CHAIN;
342	fgha-A	05:04:00	03:08:00	80	304	3	PDB	HUMAN:AF-O76036-F1	NATURAL CYTOTOXICITY TRIGGERING RECEPTOR 1;
343	e030-A	05:03:00	03:02:00	88	326	10	PDB	HUMAN:AF-Q6DKI7-F1	TRANSMEMBRANE PROTEIN PVRIG;
344	ffxx-A	05:03:00	03:03:00	84	427	12	PDB	HUMAN:AF-P78552-F1	INTERLEUKIN-13 RECEPTOR SUBUNIT ALPHA-1;
345	fg14-A	05:03:00	03:07:00	86	342	6	PDB	HUMAN:AF-A6NEK1-F1	ARRESTIN DOMAIN-CONTAINING PROTEIN 5;
346	eztx-A	05:03:00	03:09:00	90	417	12	PDB	HUMAN:AF-A5PLN9-F1	TRAFFICKING PROTEIN PARTICLE COMPLEX SUBUNIT 13;
347	fdx0-A	05:03:00	03:03:00	90	1435	8	PDB	HUMAN:AF-A2PYH4-F1	PROBABLE ATP-DEPENDENT DNA HELICASE HFM1;
348	fdsd-A	05:03:00	03:09:00	82	598	6	PDB	HUMAN:AF-Q8N423-F1	LEUKOCYTE IMMUNOGLOBULIN-LIKE RECEPTOR SUBFAMILY
349	e45i-A	05:03:00	03:09:00	83	502	8	PDB	HUMAN:AF-Q9NRM6-F1	INTERLEUKIN-17 RECEPTOR B;
350	e81t-A	05:03:00	04:02:00	97	555	6	PDB	HUMAN:AF-Q8NB59-F1	SYNAPTOTAGMIN-14;
351	e6vq-A	05:03:00	03:08:00	92	879	8	PDB	HUMAN:AF-O00462-F1	BETA-MANNOSIDASE;
352	e6lo-A	05:03:00	03:05:00	88	481	5	PDB	HUMAN:AF-A6NMB1-F1	SIALIC ACID-BINDING IG-LIKE LECTIN 16;
353	e8pk-A	05:03:00	03:07:00	84	553	2	PDB	HUMAN:AF-Q9UHF4-F1	INTERLEUKIN-20 RECEPTOR SUBUNIT ALPHA;
354	e5ha-A	05:03:00	04:06:00	82	1400	4	PDB	HUMAN:AF-Q8WZ42-F7	7 TITIN;
355	e9vf-A	05:03:00	06:02:00	87	398	8	PDB	HUMAN:AF-A0A0G2JLM	5-F1 UNCHARACTERIZED PROTEIN;
356	e8ux-A	05:03:00	03:09:00	89	2012	4	PDB	HUMAN:AF-O60469-F1	DOWN SYNDROME CELL ADHESION MOLECULE;
357	e053-A	05:03:00	03:05:00	79	1400	8	PDB	HUMAN:AF-P98160-F1	2 BASEMENT MEMBRANE-SPECIFIC HEPARAN SULFATE PROTEO
358	e61b-A	05:03:00	03:02:00	88	595	9	PDB	HUMAN:AF-Q96PQ1-F1	SIALIC ACID-BINDING IG-LIKE LECTIN 12;
359	e6vf-A	05:03:00	03:06:00	79	384	10	PDB	HUMAN:AF-A8MTB9-F1	CARCINOEMBRYONIC ANTIGEN-RELATED CELL ADHESION MO
360	e4gi-A	05:03:00	03:04:00	76	336	8	PDB	HUMAN:AF-A6NGN9-F1	IGLON FAMILY MEMBER 5;
361	fbbb-A	05:03:00	03:01:00	81	525	9	PDB	HUMAN:AF-P18627-F1	LYMPHOCYTE ACTIVATION GENE 3 PROTEIN;
362	e0nd-A	05:03:00	04:00:00	81	455	5	PDB	HUMAN:AF-P43630-F1	KILLER CELL IMMUNOGLOBULIN-LIKE RECEPTOR 3DL2;
363	fesw-A	05:03:00	05:00:00	90	229	6	PDB	HUMAN:AF-Q14213-F1	INTERLEUKIN-27 SUBUNIT BETA;
364	e4x2-A	05:03:00	02:09:00	79	2347	6	PDB	HUMAN:AF-P08922-F1	PROTO-ONCOGENE TYROSINE-PROTEIN KINASE ROS;
365	e7hh-A	05:03:00	03:04:00	85	398	7	PDB	HUMAN:AF-Q9Y639-F1	NEUROPLASTIN;
366	e3h8-A	05:02:00	04:04:00	86	728	1	PDB	HUMAN:AF-Q9NQ86-F1	E3 UBIQUITIN-PROTEIN LIGASE TRIM36;
367	eziu-A	05:02:00	03:04:00	83	593	13	PDB	HUMAN:AF-Q8NFJ9-F1	BARDET-BIEDL SYNDROME 1 PROTEIN;
368	fcyb-A	05:02:00	03:05:00	95	1885	3	PDB	HUMAN:AF-Q8IZJ3-F1	C3 AND PZP-LIKE ALPHA-2-MACROGLOBULIN DOMAIN-CONT
369	feyh-A	05:02:00	03:08:00	83	1338	12	PDB	HUMAN:AF-P17948-F1	VASCULAR ENDOTHELIAL GROWTH FACTOR RECEPTOR 1;
370	fc2m-A	05:02:00	04:01:00	81	1353	14	PDB	HUMAN:AF-Q9ULU8-F1	CALCIUM-DEPENDENT SECRETION ACTIVATOR 1;
371	e0mu-A	05:02:00	03:05:00	90	760	2	PDB	HUMAN:AF-Q9UGP8-F1	TRANSLOCATION PROTEIN SEC63 HOMOLOG;
372	ffko-A	05:02:00	03:08:00	83	236	5	PDB	HUMAN:AF-Q6UX27-F1	V-SET AND TRANSMEMBRANE DOMAIN-CONTAINING PROTEIN
373	e16b-A	05:02:00	02:09:00	81	1222	4	PDB	HUMAN:AF-P69849-F1	NODAL MODULATOR 3;
374	fa7v-A	05:02:00	03:01:00	86	419	2	PDB	HUMAN:AF-Q00888-F1	PREGNANCY-SPECIFIC BETA-1-GLYCOPROTEIN 4;
375	e52k-A	05:02:00	03:08:00	79	304	8	PDB	HUMAN:AF-Q14954-F1	KILLER CELL IMMUNOGLOBULIN-LIKE RECEPTOR 2DS1;
376	e2yd-A	05:02:00	03:01:00	90	391	3	PDB	HUMAN:AF-Q92546-F1	RAB6A-GEF COMPLEX PARTNER PROTEIN 2;
377	e2tp-A	05:02:00	03:07:00	86	419	1	PDB	HUMAN:AF-P11464-F1	PREGNANCY-SPECIFIC BETA-1-GLYCOPROTEIN 1;
378	e9y4-A	05:02:00	04:05:00	83	496	5	PDB	HUMAN:AF-Q9BTV5-F1	FIBRONECTIN TYPE III AND SPRY DOMAIN-CONTAINING P
379	e1d4-A	05:02:00	03:09:00	85	365	11	PDB	HUMAN:AF-P78310-F1	COXSACKIEVIRUS AND ADENOVIRUS RECEPTOR;
380	e2s1-A	05:02:00	03:09:00	86	868	8	PDB	HUMAN:AF-Q3MJ16-F1	CYTOSOLIC PHOSPHOLIPASE A2 EPSILON;
381	ezgt-A	05:02:00	03:07:00	75	338	9	PDB	HUMAN:AF-Q13449-F1	LIMBIC SYSTEM-ASSOCIATED MEMBRANE PROTEIN;
382	fd1e-A	05:02:00	04:07:00	82	1400	5	PDB	HUMAN:AF-Q8WZ42-F7	8 TITIN;
383	ey87-A	05:02:00	03:07:00	85	732	6	PDB	HUMAN:AF-P00488-F1	COAGULATION FACTOR XIII A CHAIN;
384	e53i-A	05:02:00	03:05:00	81	398	11	PDB	HUMAN:AF-Q8N126-F1	CELL ADHESION MOLECULE 3;
385	fgf1-A	05:02:00	05:02:00	86	1349	5	PDB	HUMAN:AF-Q9UPX0-F1	PROTEIN TURTLE HOMOLOG B;
386	e6to-A	05:02:00	03:08:00	76	458	9	PDB	HUMAN:AF-P01730-F1	T-CELL SURFACE GLYCOPROTEIN CD4;
387	e1cp-A	05:02:00	04:03:00	81	2053	4	PDB	HUMAN:AF-Q8TD84-F1	DOWN SYNDROME CELL ADHESION MOLECULE-LIKE PROTEIN
388	e7ke-A	05:02:00	04:01:00	79	339	8	PDB	HUMAN:AF-Q9HCN6-F1	PLATELET GLYCOPROTEIN VI;
389	e8f2-A	05:02:00	03:07:00	80	1400	8	PDB	HUMAN:AF-P98160-F7	BASEMENT MEMBRANE-SPECIFIC HEPARAN SULFATE PROTEO
390	e0b3-A	05:02:00	04:01:00	80	271	4	PDB	HUMAN:AF-B6A8C7-F1	T-CELL-INTERACTING, ACTIVATING RECEPTOR ON MYELOI
391	fesr-A	05:02:00	04:08:00	86	1400	2	PDB	HUMAN:AF-O75445-F6	USHERIN;
392	e85q-A	05:02:00	04:03:00	84	667	5	PDB	HUMAN:AF-O15344-F1	E3 UBIQUITIN-PROTEIN LIGASE MIDLINE-1;
393	e396-A	05:02:00	04:04:00	80	1400	8	PDB	HUMAN:AF-Q8WZ42-F1	04 TITIN;
394	e144-A	05:02:00	04:03:00	79	1400	4	PDB	HUMAN:AF-Q8WZ42-F7	9 TITIN;
395	fah4-A	05:02:00	03:09:00	82	1400	6	PDB	HUMAN:AF-O75445-F9	USHERIN;
396	e2zq-A	05:01:00	03:06:00	97	1113	5	PDB	HUMAN:AF-Q8IX03-F1	PROTEIN KIBRA;
397	e25t-A	05:01:00	03:02:00	88	1308	5	PDB	HUMAN:AF-Q86UK5-F1	LIMBIN;
398	fdpd-A	05:01:00	03:09:00	87	749	6	PDB	HUMAN:AF-P47712-F1	CYTOSOLIC PHOSPHOLIPASE A2;
399	fgfn-A	05:01:00	03:08:00	83	327	6	PDB	HUMAN:AF-Q96IQ7-F1	V-SET AND IMMUNOGLOBULIN DOMAIN-CONTAINING PROTEI
400	e1h0-A	05:01:00	03:06:00	84	384	10	PDB	HUMAN:AF-P01880-F1	IMMUNOGLOBULIN HEAVY CONSTANT DELTA;
401	e1ae-A	05:01:00	04:06:00	76	351	8	PDB	HUMAN:AF-P06729-F1	T-CELL SURFACE ANTIGEN CD2;
402	e0it-A	05:01:00	02:08:00	81	1267	4	PDB	HUMAN:AF-Q5JPE7-F1	NODAL MODULATOR 2;
403	e86z-A	05:01:00	04:01:00	97	552	5	PDB	HUMAN:AF-O60291-F1	E3 UBIQUITIN-PROTEIN LIGASE MGRN1;
404	e1l2-A	05:01:00	03:07:00	82	349	6	PDB	HUMAN:AF-P31997-F1	CARCINOEMBRYONIC ANTIGEN-RELATED CELL ADHESION MO
405	e6im-A	05:01:00	03:06:00	82	1400	1	PDB	HUMAN:AF-O75445-F8	USHERIN;
406	e6o2-A	05:01:00	03:07:00	99	500	6	PDB	HUMAN:AF-Q06330-F1	RECOMBINING BINDING PROTEIN SUPPRESSOR OF HAIRLES
407	e54b-A	05:01:00	03:01:00	80	1400	8	PDB	HUMAN:AF-P98160-F1	3 BASEMENT MEMBRANE-SPECIFIC HEPARAN SULFATE PROTEO
408	e4wc-A	05:01:00	03:03:00	87	414	6	PDB	HUMAN:AF-Q96B67-F1	ARRESTIN DOMAIN-CONTAINING PROTEIN 3;
409	e69j-A	05:01:00	03:07:00	82	1115	5	PDB	HUMAN:AF-Q9HD43-F1	RECEPTOR-TYPE TYROSINE-PROTEIN PHOSPHATASE H;
410	fdpg-A	05:01:00	03:07:00	88	2136	9	PDB	HUMAN:AF-O75643-F1	U5 SMALL NUCLEAR RIBONUCLEOPROTEIN 200 KDA HELICA
411	fa1c-A	05:01:00	04:06:00	79	1400	4	PDB	HUMAN:AF-Q8WZ42-F8	0 TITIN;
412	e1xz-A	05:01:00	03:03:00	77	323	13	PDB	HUMAN:AF-P31995-F1	LOW AFFINITY IMMUNOGLOBULIN GAMMA FC REGION RECEP
413	e46k-A	05:01:00	04:03:00	86	1005	3	PDB	HUMAN:AF-P29322-F1	EPHRIN TYPE-A RECEPTOR 8;
414	fedn-A	05:01:00	04:07:00	90	622	9	PDB	HUMAN:AF-P16471-F1	PROLACTIN RECEPTOR;
415	e2i6-A	05:01:00	03:06:00	85	265	6	PDB	HUMAN:AF-Q14002-F1	CARCINOEMBRYONIC ANTIGEN-RELATED CELL ADHESION MO
416	e4k7-A	05:00:00	03:03:00	84	442	8	PDB	HUMAN:AF-Q9BY67-F1	CELL ADHESION MOLECULE 1;
417	e86j-A	05:00:00	03:07:00	76	1400	7	PDB	HUMAN:AF-Q8N3K9-F1	3 CARDIOMYOPATHY-ASSOCIATED PROTEIN 5;
418	e081-A	05:00:00	04:07:00	81	1400	4	PDB	HUMAN:AF-Q8WZ42-F7	6 TITIN;
419	e2lx-A	05:00:00	03:02:00	81	293	9	PDB	HUMAN:AF-Q3KPI0-F1	CARCINOEMBRYONIC ANTIGEN-RELATED CELL ADHESION MO
420	e69w-A	05:00:00	03:08:00	83	495	6	PDB	HUMAN:AF-P04217-F1	ALPHA-1B-GLYCOPROTEIN;
421	fdhm-A	05:00:00	03:05:00	81	189	9	PDB	HUMAN:AF-P03986-F1	T CELL RECEPTOR GAMMA CONSTANT 2;
422	e7to-A	05:00:00	03:08:00	80	296	5	PDB	HUMAN:AF-A0A1W2PQM	1-F1 UNCHARACTERIZED PROTEIN;
423	fb4e-A	05:00:00	02:09:00	81	1222	4	PDB	HUMAN:AF-Q15155-F1	NODAL MODULATOR 1;
424	e47t-A	05:00:00	03:06:00	80	233	13	PDB	HUMAN:AF-O75015-F1	LOW AFFINITY IMMUNOGLOBULIN GAMMA FC REGION RECEP
425	e1pr-A	05:00:00	03:02:00	82	955	4	PDB	HUMAN:AF-Q8NFP4-F1	MAM DOMAIN-CONTAINING GLYCOSYLPHOSPHATIDYLINOSITO
426	ezfh-A	05:00:00	03:03:00	77	310	13	PDB	HUMAN:AF-P31994-F1	LOW AFFINITY IMMUNOGLOBULIN GAMMA FC REGION RECEP
427	e9w4-A	05:00:00	04:00:00	87	263	7	PDB	HUMAN:AF-Q969J5-F1	INTERLEUKIN-22 RECEPTOR SUBUNIT ALPHA-2;
428	e63e-A	05:00:00	03:09:00	81	1017	7	PDB	HUMAN:AF-Q63HQ2-F1	PIKACHURIN;
429	fdkv-A	05:00:00	03:09:00	85	337	0	PDB	HUMAN:AF-P38484-F1	INTERFERON GAMMA RECEPTOR 2;
430	e310-A	05:00:00	04:00:00	87	510	13	PDB	HUMAN:AF-Q96NY8-F1	NECTIN-4;
431	e5uj-A	05:00:00	04:05:00	89	1114	9	PDB	HUMAN:AF-Q9BWV1-F1	BROTHER OF CDO;
432	e8a0-A	05:00:00	03:07:00	79	526	6	PDB	HUMAN:AF-P13688-F1	CARCINOEMBRYONIC ANTIGEN-RELATED CELL ADHESION MO
433	e4to-A	05:00:00	03:03:00	80	1400	8	PDB	HUMAN:AF-P98160-F8	BASEMENT MEMBRANE-SPECIFIC HEPARAN SULFATE PROTEO
434	e72t-A	05:00:00	04:02:00	80	1400	4	PDB	HUMAN:AF-Q8WZ42-F1	40 TITIN;
435	fapb-A	05:00:00	04:01:00	85	319	6	PDB	HUMAN:AF-Q99795-F1	CELL SURFACE A33 ANTIGEN;
436	e8z5-A	05:00:00	03:03:00	76	317	13	PDB	HUMAN:AF-P12318-F1	LOW AFFINITY IMMUNOGLOBULIN GAMMA FC REGION RECEP
437	fec2-A	05:00:00	03:09:00	87	387	5	PDB	HUMAN:AF-Q86XK7-F1	V-SET AND IMMUNOGLOBULIN DOMAIN-CONTAINING PROTEI
438	e2gh-A	05:00:00	04:06:00	83	1124	8	PDB	HUMAN:AF-Q02763-F1	ANGIOPOIETIN-1 RECEPTOR;
439	fa09-A	04:09:00	06:06:00	87	628	6	PDB	HUMAN:AF-Q9BTN0-F1	LEUCINE-RICH REPEAT AND FIBRONECTIN TYPE-III DOMA
440	fff6-A	04:09:00	04:03:00	85	999	5	PDB	HUMAN:AF-Q12866-F1	TYROSINE-PROTEIN KINASE MER;
441	e6d5-A	04:09:00	03:04:00	88	300	8	PDB	HUMAN:AF-Q8WZ71-F1	TRANSMEMBRANE PROTEIN 158;
442	e15u-A	04:09:00	03:08:00	79	673	9	PDB	HUMAN:AF-Q6EMK4-F1	VASORIN;
443	e7pc-A	04:09:00	04:02:00	89	422	9	PDB	HUMAN:AF-Q14626-F1	INTERLEUKIN-11 RECEPTOR SUBUNIT ALPHA;
444	e4q6-A	04:09:00	03:05:00	83	200	10	PDB	HUMAN:AF-A8MXK1-F1	V-SET AND TRANSMEMBRANE DOMAIN-CONTAINING PROTEIN
445	e969-A	04:09:00	03:08:00	99	815	10	PDB	HUMAN:AF-Q5R372-F1	RAB GTPASE-ACTIVATING PROTEIN 1-LIKE;
446	e8vf-A	04:09:00	03:08:00	82	1441	6	PDB	HUMAN:AF-O14522-F1	RECEPTOR-TYPE TYROSINE-PROTEIN PHOSPHATASE T;
447	e04m-A	04:09:00	03:07:00	81	549	4	PDB	HUMAN:AF-Q9NQS3-F1	NECTIN-3;
448	ffl9-A	04:09:00	03:08:00	77	243	12	PDB	HUMAN:AF-P09326-F1	CD48 ANTIGEN;
449	ezpo-A	04:09:00	03:06:00	76	345	9	PDB	HUMAN:AF-Q14982-F1	OPIOID-BINDING PROTEIN/CELL ADHESION MOLECULE;
450	ffa9-A	04:09:00	04:01:00	85	422	7	PDB	HUMAN:AF-O75462-F1	CYTOKINE RECEPTOR-LIKE FACTOR 1;
451	e0h6-A	04:09:00	03:04:00	79	1400	6	PDB	HUMAN:AF-P98160-F1	0 BASEMENT MEMBRANE-SPECIFIC HEPARAN SULFATE PROTEO
452	e342-A	04:09:00	03:06:00	79	2332	6	PDB	HUMAN:AF-Q9UMZ3-F1	PHOSPHATIDYLINOSITOL PHOSPHATASE PTPRQ;
453	e8kq-A	04:09:00	03:08:00	78	792	5	PDB	HUMAN:AF-Q9Y5Z7-F1	HOST CELL FACTOR 2;
454	fbls-A	04:09:00	04:00:00	84	1400	5	PDB	HUMAN:AF-O75445-F5	USHERIN;
455	e8t9-A	04:09:00	03:04:00	80	1400	8	PDB	HUMAN:AF-P98160-F1	1 BASEMENT MEMBRANE-SPECIFIC HEPARAN SULFATE PROTEO
456	fgfc-A	04:09:00	04:04:00	83	1008	4	PDB	HUMAN:AF-Q5JZY3-F1	EPHRIN TYPE-A RECEPTOR 10;
457	e9k5-A	04:09:00	03:07:00	84	373	12	PDB	HUMAN:AF-Q9H6B4-F1	CXADR-LIKE MEMBRANE PROTEIN;
458	femu-A	04:08:00	04:00:00	87	1039	10	PDB	HUMAN:AF-P08514-F1	INTEGRIN ALPHA-IIB;
459	ez2y-A	04:08:00	04:01:00	80	1296	13	PDB	HUMAN:AF-Q86UW7-F1	CALCIUM-DEPENDENT SECRETION ACTIVATOR 2;
460	e0qp-A	04:08:00	04:00:00	86	1318	6	PDB	HUMAN:AF-Q5DID0-F1	UROMODULIN-LIKE 1;
461	fgti-A	04:08:00	03:08:00	79	747	1	PDB	HUMAN:AF-Q6UWL2-F1	SUSHI DOMAIN-CONTAINING PROTEIN 1;
462	fbp3-A	04:08:00	04:01:00	80	580	8	PDB	HUMAN:AF-Q8NAT1-F1	PROTEIN O-LINKED-MANNOSE
463	e47n-A	04:08:00	03:06:00	80	1079	0	PDB	HUMAN:AF-Q8IZF5-F1	ADHESION G-PROTEIN COUPLED RECEPTOR F3;
464	fbm5-A	04:08:00	03:03:00	84	567	2	PDB	HUMAN:AF-Q92696-F1	GERANYLGERANYL TRANSFERASE TYPE-2 SUBUNIT ALPHA;
465	e8vy-A	04:08:00	04:03:00	99	562	11	PDB	HUMAN:AF-Q8IYJ3-F1	SYNAPTOTAGMIN-LIKE PROTEIN 1;
466	e3d5-A	04:08:00	04:01:00	91	414	10	PDB	HUMAN:AF-Q9UM44-F1	HERV-H LTR-ASSOCIATING PROTEIN 2;
467	e63i-A	04:08:00	03:02:00	94	1133	5	PDB	HUMAN:AF-Q7Z392-F1	TRAFFICKING PROTEIN PARTICLE COMPLEX SUBUNIT 11;
468	fg4b-A	04:08:00	03:02:00	71	158	7	PDB	HUMAN:AF-Q86WS3-F1	OOCYTE-SECRETED PROTEIN 2;
469	ezdl-A	04:08:00	05:00:00	84	1400	5	PDB	HUMAN:AF-Q8WZ42-F1	28 TITIN;
470	e8c7-A	04:08:00	04:02:00	81	1400	6	PDB	HUMAN:AF-Q8WZ42-F9	5 TITIN;
471	e866-A	04:08:00	04:09:00	87	1198	8	PDB	HUMAN:AF-Q9Y2H6-F1	FIBRONECTIN TYPE-III DOMAIN-CONTAINING PROTEIN 3A
472	feev-A	04:08:00	04:00:00	88	468	6	PDB	HUMAN:AF-P08887-F1	INTERLEUKIN-6 RECEPTOR SUBUNIT ALPHA;
473	e4t7-A	04:08:00	03:09:00	84	414	8	PDB	HUMAN:AF-P0DPA2-F1	V-SET AND IMMUNOGLOBULIN DOMAIN-CONTAINING PROTEI
474	fa6z-A	04:08:00	05:00:00	81	1400	2	PDB	HUMAN:AF-O75445-F4	USHERIN;
475	fgrg-A	04:08:00	04:02:00	79	1400	9	PDB	HUMAN:AF-Q8WZ42-F7	4 TITIN;
476	e9nf-A	04:08:00	04:00:00	81	1055	9	PDB	HUMAN:AF-P29323-F1	EPHRIN TYPE-B RECEPTOR 2;
477	e7ea-A	04:08:00	05:01:00	83	1204	5	PDB	HUMAN:AF-Q53EP0-F1	FIBRONECTIN TYPE III DOMAIN-CONTAINING PROTEIN 3B
478	ff7r-A	04:08:00	03:07:00	79	344	8	PDB	HUMAN:AF-P40199-F1	CARCINOEMBRYONIC ANTIGEN-RELATED CELL ADHESION MO
479	e5du-A	04:08:00	03:03:00	81	847	11	PDB	HUMAN:AF-P20273-F1	B-CELL RECEPTOR CD22;
480	e6pw-A	04:08:00	04:00:00	92	262	5	PDB	HUMAN:AF-Q96A25-F1	TRANSMEMBRANE PROTEIN 106A;
481	e3jc-A	04:08:00	03:03:00	75	257	9	PDB	HUMAN:AF-P12319-F1	HIGH AFFINITY IMMUNOGLOBULIN EPSILON RECEPTOR SUB
482	e63y-A	04:08:00	03:07:00	88	336	5	PDB	HUMAN:AF-Q4G0F5-F1	VACUOLAR PROTEIN SORTING-ASSOCIATED PROTEIN 26B;
483	fgdv-A	04:08:00	04:01:00	82	1400	4	PDB	HUMAN:AF-Q8WZ42-F1	39 TITIN;
484	fdd5-A	04:07:00	03:09:00	87	739	2	PDB	HUMAN:AF-Q8NFM7-F1	INTERLEUKIN-17 RECEPTOR D;
485	e8an-A	04:07:00	03:01:00	80	667	8	PDB	HUMAN:AF-Q8NFR9-F1	INTERLEUKIN-17 RECEPTOR E;
486	fe8z-A	04:07:00	03:08:00	85	818	11	PDB	HUMAN:AF-Q86XP0-F1	CYTOSOLIC PHOSPHOLIPASE A2 DELTA;
487	e659-A	04:07:00	03:03:00	83	1363	5	PDB	HUMAN:AF-P35916-F1	VASCULAR ENDOTHELIAL GROWTH FACTOR RECEPTOR 3;
488	e9cc-A	04:07:00	03:06:00	96	1069	10	PDB	HUMAN:AF-Q9Y3P9-F1	RAB GTPASE-ACTIVATING PROTEIN 1;
489	fboe-A	04:07:00	04:05:00	85	763	8	PDB	HUMAN:AF-Q8N957-F1	ANKYRIN REPEAT AND FIBRONECTIN TYPE-III DOMAIN-CO
490	e6dh-A	04:07:00	03:09:00	78	1400	4	PDB	HUMAN:AF-Q8WZ42-F1	29 TITIN;
491	e0j1-A	04:07:00	04:01:00	82	828	10	PDB	HUMAN:AF-P0C7U0-F1	PROTEIN ELFN1;
492	faqd-A	04:07:00	03:00:00	84	1124	2	PDB	HUMAN:AF-Q9NQW6-F1	ANILLIN;
493	e8dh-A	04:07:00	03:09:00	89	161	10	PDB	HUMAN:AF-P04216-F1	THY-1 MEMBRANE GLYCOPROTEIN;
494	e96o-A	04:07:00	04:02:00	85	230	5	PDB	HUMAN:AF-A8MVS5-F1	PROTEIN HIDE1;
495	fa8t-A	04:07:00	04:04:00	83	740	1	PDB	HUMAN:AF-Q8WUT4-F1	LEUCINE-RICH REPEAT NEURONAL PROTEIN 4;
496	fewn-A	04:07:00	03:01:00	82	327	13	PDB	HUMAN:AF-P01861-F1	IMMUNOGLOBULIN HEAVY CONSTANT GAMMA 4;
497	e4vi-A	04:07:00	04:05:00	80	1400	4	PDB	HUMAN:AF-Q8WZ42-F1	16 TITIN;
498	fb1f-A	04:07:00	04:04:00	84	1400	4	PDB	HUMAN:AF-Q8WZ42-F1	58 TITIN;
499	e8n3-A	04:07:00	03:01:00	79	255	9	PDB	HUMAN:AF-P01906-F1	HLA CLASS II HISTOCOMPATIBILITY ANTIGEN, DQ ALPHA
500	fank-A	04:07:00	03:09:00	83	299	10	PDB	HUMAN:AF-Q9Y624-F1	JUNCTIONAL ADHESION MOLECULE A;
501	e17w-A	04:07:00	04:02:00	87	517	5	PDB	HUMAN:AF-Q15223-F1	NECTIN-1;
502	ffsw-A	04:07:00	04:07:00	81	1251	4	PDB	HUMAN:AF-Q86VF2-F1	IMMUNOGLOBULIN-LIKE AND FIBRONECTIN TYPE III DOMA
503	fbrh-A	04:07:00	04:03:00	77	1228	12	PDB	HUMAN:AF-Q9NR99-F9	MATRIX-REMODELING-ASSOCIATED PROTEIN 5;
504	e2bf-A	04:07:00	04:05:00	77	1400	6	PDB	HUMAN:AF-Q8WZ42-F1	41 TITIN;
505	e9q1-A	04:07:00	04:00:00	84	983	8	PDB	HUMAN:AF-P29320-F1	EPHRIN TYPE-A RECEPTOR 3;
506	e7y6-A	04:07:00	03:02:00	78	1400	8	PDB	HUMAN:AF-P98160-F9	BASEMENT MEMBRANE-SPECIFIC HEPARAN SULFATE PROTEO
507	e6hm-A	04:07:00	04:06:00	80	1400	5	PDB	HUMAN:AF-Q8WZ42-F1	06 TITIN;
508	fb1q-A	04:07:00	03:00:00	82	266	13	PDB	HUMAN:AF-P13762-F1	HLA CLASS II HISTOCOMPATIBILITY ANTIGEN, DR BETA
509	fe79-A	04:07:00	03:02:00	77	2623	12	PDB	HUMAN:AF-Q6WRI0-F1	IMMUNOGLOBULIN SUPERFAMILY MEMBER 10;
510	e1b1-A	04:07:00	04:04:00	79	526	6	PDB	HUMAN:AF-Q13410-F1	BUTYROPHILIN SUBFAMILY 1 MEMBER A1;
511	e482-A	04:07:00	04:01:00	87	1208	3	PDB	HUMAN:AF-O00533-F1	NEURAL CELL ADHESION MOLECULE L1-LIKE PROTEIN;
512	fdwj-A	04:07:00	03:03:00	78	383	5	PDB	HUMAN:AF-Q29983-F1	MHC CLASS I POLYPEPTIDE-RELATED SEQUENCE A;
513	e0xn-A	04:06:00	03:03:00	83	643	12	PDB	HUMAN:AF-Q0P6H9-F1	TRANSMEMBRANE PROTEIN 62;
514	ffob-A	04:06:00	04:08:00	76	745	5	PDB	HUMAN:AF-Q6UXK2-F1	IMMUNOGLOBULIN SUPERFAMILY CONTAINING LEUCINE-RIC
515	fcrt-A	04:06:00	03:02:00	76	298	17	PDB	HUMAN:AF-P25311-F1	ZINC-ALPHA-2-GLYCOPROTEIN;
516	fg6h-A	04:06:00	03:02:00	87	962	5	PDB	HUMAN:AF-Q9NVH2-F1	INTEGRATOR COMPLEX SUBUNIT 7;
517	e888-A	04:06:00	04:02:00	88	1049	7	PDB	HUMAN:AF-P08648-F1	INTEGRIN ALPHA-5;
518	e678-A	04:06:00	03:08:00	74	789	5	PDB	HUMAN:AF-Q9ULH4-F1	LEUCINE-RICH REPEAT AND FIBRONECTIN TYPE-III DOMA
519	fgvc-A	04:06:00	03:06:00	95	1805	6	PDB	HUMAN:AF-Q9H1H9-F1	KINESIN-LIKE PROTEIN KIF13A;
520	e722-A	04:06:00	03:01:00	74	280	8	PDB	HUMAN:AF-Q92637-F1	HIGH AFFINITY IMMUNOGLOBULIN GAMMA FC RECEPTOR IB
521	e8kn-A	04:06:00	03:09:00	85	1068	8	PDB	HUMAN:AF-Q9Y4F9-F1	RHO FAMILY-INTERACTING CELL POLARIZATION REGULATO
522	e2rp-A	04:06:00	04:02:00	79	998	3	PDB	HUMAN:AF-Q15375-F1	EPHRIN TYPE-A RECEPTOR 7;
523	e1e2-A	04:06:00	03:08:00	83	548	7	PDB	HUMAN:AF-Q96FN4-F1	COPINE-2;
524	fbjf-A	04:06:00	03:01:00	80	1003	3	PDB	HUMAN:AF-Q9HCE1-F1	HELICASE MOV-10;
525	fcb2-A	04:06:00	04:02:00	86	1400	9	PDB	HUMAN:AF-Q8N3K9-F1	4 CARDIOMYOPATHY-ASSOCIATED PROTEIN 5;
526	fenk-A	04:06:00	04:02:00	86	1269	9	PDB	HUMAN:AF-Q8N3K9-F1	5 CARDIOMYOPATHY-ASSOCIATED PROTEIN 5;
527	e7xv-A	04:06:00	04:06:00	86	1400	5	PDB	HUMAN:AF-Q8WZ42-F1	07 TITIN;
528	fcw6-A	04:06:00	03:01:00	79	260	14	PDB	HUMAN:AF-P20036-F1	HLA CLASS II HISTOCOMPATIBILITY ANTIGEN, DP ALPHA
529	e8w6-A	04:06:00	03:07:00	89	2202	9	PDB	HUMAN:AF-Q8N3C0-F1	ACTIVATING SIGNAL COINTEGRATOR 1 COMPLEX SUBUNIT
530	fbkx-A	04:06:00	03:03:00	80	635	8	PDB	HUMAN:AF-P40238-F1	THROMBOPOIETIN RECEPTOR;
531	fezl-A	04:06:00	03:07:00	82	275	4	PDB	HUMAN:AF-P13598-F1	INTERCELLULAR ADHESION MOLECULE 2;
532	eze1-A	04:06:00	04:01:00	78	1400	6	PDB	HUMAN:AF-O75445-F7	USHERIN;
533	fahx-A	04:06:00	03:02:00	82	1241	7	PDB	HUMAN:AF-O60500-F1	NEPHRIN;
534	fcl4-A	04:06:00	04:09:00	77	1400	4	PDB	HUMAN:AF-Q8WZ42-F8	1 TITIN;
535	ezi8-A	04:06:00	03:02:00	77	1400	8	PDB	HUMAN:AF-P98160-F6	BASEMENT MEMBRANE-SPECIFIC HEPARAN SULFATE PROTEO
536	e170-A	04:06:00	03:04:00	82	454	10	PDB	HUMAN:AF-Q68D85-F1	NATURAL CYTOTOXICITY TRIGGERING RECEPTOR 3 LIGAND
537	e7ad-A	04:06:00	03:09:00	86	557	9	PDB	HUMAN:AF-P17181-F1	INTERFERON ALPHA/BETA RECEPTOR 1;
538	ffbu-A	04:06:00	03:05:00	85	364	8	PDB	HUMAN:AF-P20138-F1	MYELOID CELL SURFACE ANTIGEN CD33;
539	e6zs-A	04:06:00	04:06:00	80	1400	5	PDB	HUMAN:AF-Q8WZ42-F1	15 TITIN;
540	e1dl-A	04:06:00	03:03:00	82	268	9	PDB	HUMAN:AF-P05538-F1	HLA CLASS II HISTOCOMPATIBILITY ANTIGEN, DQ BETA
541	ferd-A	04:05:00	03:09:00	80	640	6	PDB	HUMAN:AF-O15484-F1	CALPAIN-5;
542	e176-A	04:05:00	04:01:00	83	1400	2	PDB	HUMAN:AF-Q8WZ42-F1	22 TITIN;
543	e5oj-A	04:05:00	03:00:00	78	254	9	PDB	HUMAN:AF-A0A0G2JMH	6-F1 HLA-DRA;
544	fdbr-A	04:05:00	03:07:00	79	388	4	PDB	HUMAN:AF-Q8NFZ8-F1	CELL ADHESION MOLECULE 4;
545	e8mc-A	04:05:00	03:00:00	78	250	13	PDB	HUMAN:AF-P06340-F1	HLA CLASS II HISTOCOMPATIBILITY ANTIGEN, DO ALPHA
546	e93j-A	04:05:00	03:08:00	79	235	5	PDB	HUMAN:AF-P01732-F1	T-CELL SURFACE GLYCOPROTEIN CD8 ALPHA CHAIN;
547	e55f-A	04:05:00	04:01:00	81	350	11	PDB	HUMAN:AF-Q8IYV9-F1	IZUMO SPERM-EGG FUSION PROTEIN 1;
548	e68f-A	04:05:00	03:02:00	80	273	11	PDB	HUMAN:AF-P13765-F1	HLA CLASS II HISTOCOMPATIBILITY ANTIGEN, DO BETA
549	fcum-A	04:05:00	04:02:00	80	278	5	PDB	HUMAN:AF-P41217-F1	OX-2 MEMBRANE GLYCOPROTEIN;
550	e27c-A	04:05:00	04:01:00	80	184	4	PDB	HUMAN:AF-O00526-F1	UROPLAKIN-2;
551	fepc-A	04:05:00	03:06:00	88	1244	6	PDB	HUMAN:AF-O00562-F1	MEMBRANE-ASSOCIATED PHOSPHATIDYLINOSITOL TRANSFER
552	e7tz-A	04:05:00	03:06:00	95	164	7	PDB	HUMAN:AF-Q96F85-F1	CB1 CANNABINOID RECEPTOR-INTERACTING PROTEIN 1;
553	e2n4-A	04:05:00	03:07:00	88	974	7	PDB	HUMAN:AF-Q9BZ71-F1	MEMBRANE-ASSOCIATED PHOSPHATIDYLINOSITOL TRANSFER
554	e305-A	04:05:00	03:06:00	86	183	10	PDB	HUMAN:AF-P43308-F1	TRANSLOCON-ASSOCIATED PROTEIN SUBUNIT BETA;
555	ez8w-A	04:05:00	03:04:00	87	1791	1	PDB	HUMAN:AF-Q9BXP8-F1	PAPPALYSIN-2;
556	e6fc-A	04:05:00	03:08:00	90	326	8	PDB	HUMAN:AF-P01859-F1	IMMUNOGLOBULIN HEAVY CONSTANT GAMMA 2;
557	e75s-A	04:05:00	04:05:00	84	1400	5	PDB	HUMAN:AF-Q8WZ42-F8	2 TITIN;
558	e2ir-A	04:05:00	02:09:00	77	383	4	PDB	HUMAN:AF-Q29980-F1	MHC CLASS I POLYPEPTIDE-RELATED SEQUENCE B;
559	ffkf-A	04:05:00	03:02:00	79	1400	8	PDB	HUMAN:AF-Q8NDA2-F1	HEMICENTIN-2;
560	fdb0-A	04:05:00	03:08:00	74	719	4	PDB	HUMAN:AF-Q96NI6-F1	LEUCINE-RICH REPEAT AND FIBRONECTIN TYPE-III DOMA
561	fbpg-A	04:05:00	03:04:00	80	998	5	PDB	HUMAN:AF-P54753-F1	EPHRIN TYPE-B RECEPTOR 3;
562	fdoc-A	04:05:00	05:02:00	81	1400	5	PDB	HUMAN:AF-Q8WZ42-F7	1 TITIN;
563	ezmq-A	04:05:00	03:07:00	81	1400	6	PDB	HUMAN:AF-Q8WZ42-F1	31 TITIN;
564	e99d-A	04:05:00	04:03:00	82	1400	2	PDB	HUMAN:AF-Q8WZ42-F9	1 TITIN;
565	fev2-A	04:05:00	05:05:00	84	1400	5	PDB	HUMAN:AF-Q8WZ42-F6	6 TITIN;
566	e3ff-A	04:05:00	03:02:00	84	649	5	PDB	HUMAN:AF-Q9NZU0-F1	LEUCINE-RICH REPEAT TRANSMEMBRANE PROTEIN FLRT3;
567	fcjk-A	04:05:00	04:07:00	79	1400	6	PDB	HUMAN:AF-Q8WZ42-F1	49 TITIN;
568	e6o5-A	04:05:00	03:02:00	83	453	8	PDB	HUMAN:AF-P01871-F1	IMMUNOGLOBULIN HEAVY CONSTANT MU;
569	feuc-A	04:05:00	03:07:00	85	390	6	PDB	HUMAN:AF-Q96AP7-F1	ENDOTHELIAL CELL-SELECTIVE ADHESION MOLECULE;
570	e228-A	04:05:00	04:04:00	79	1400	4	PDB	HUMAN:AF-Q8WZ42-F1	08 TITIN;
571	fe2y-A	04:05:00	04:02:00	77	1400	5	PDB	HUMAN:AF-Q8WZ42-F9	7 TITIN;
572	ff8x-A	04:05:00	03:09:00	80	1400	8	PDB	HUMAN:AF-Q8WZ42-F6	9 TITIN;
573	fc6i-A	04:05:00	04:06:00	82	1400	4	PDB	HUMAN:AF-Q8WZ42-F1	37 TITIN;
574	e6ej-A	04:05:00	04:02:00	77	1452	5	PDB	HUMAN:AF-P28827-F1	RECEPTOR-TYPE TYROSINE-PROTEIN PHOSPHATASE MU;
575	e6na-A	04:05:00	03:02:00	80	354	6	PDB	HUMAN:AF-Q7Z3B1-F1	NEURONAL GROWTH REGULATOR 1;
576	ez3a-A	04:05:00	04:07:00	82	1400	4	PDB	HUMAN:AF-Q8WZ42-F1	09 TITIN;
577	e42l-A	04:05:00	04:03:00	84	1400	4	PDB	HUMAN:AF-Q8WZ42-F1	42 TITIN;
578	e62f-A	04:04:00	03:05:00	90	1032	8	PDB	HUMAN:AF-P13612-F1	INTEGRIN ALPHA-4;
579	e8qz-A	04:04:00	03:09:00	66	182	11	PDB	HUMAN:AF-P09693-F1	T-CELL SURFACE GLYCOPROTEIN CD3 GAMMA CHAIN;
580	e4y8-A	04:04:00	03:00:00	84	315	10	PDB	HUMAN:AF-P0DTU4-F1	T CELL RECEPTOR BETA CHAIN MC.7.G5;
581	e5yc-A	04:04:00	03:07:00	82	1465	6	PDB	HUMAN:AF-P54296-F1	MYOMESIN-2;
582	e646-A	04:04:00	03:08:00	88	428	13	PDB	HUMAN:AF-P01854-F1	IMMUNOGLOBULIN HEAVY CONSTANT EPSILON;
583	e7kd-A	04:04:00	04:02:00	86	1400	3	PDB	HUMAN:AF-Q9NYQ8-F2	PROTOCADHERIN FAT 2;
584	fc9h-A	04:04:00	03:09:00	92	274	5	PDB	HUMAN:AF-Q9NUM4-F1	TRANSMEMBRANE PROTEIN 106B;
585	e1xr-A	04:04:00	04:02:00	84	537	7	PDB	HUMAN:AF-O75131-F1	COPINE-3;
586	fcgy-A	04:04:00	03:05:00	82	345	2	PDB	HUMAN:AF-Q8TC84-F1	FIBRONECTIN TYPE 3 AND ANKYRIN REPEAT DOMAINS PRO
587	fewr-A	04:04:00	04:03:00	87	1721	5	PDB	HUMAN:AF-Q15811-F1	INTERSECTIN-1;
588	e9ky-A	04:04:00	03:06:00	92	258	4	PDB	HUMAN:AF-Q8TBF5-F1	PHOSPHATIDYLINOSITOL-GLYCAN BIOSYNTHESIS CLASS X
589	fdxz-A	04:04:00	03:08:00	84	858	11	PDB	HUMAN:AF-Q5T0F9-F1	COILED-COIL AND C2 DOMAIN-CONTAINING PROTEIN 1B;
590	ez7y-A	04:04:00	04:01:00	81	287	5	PDB	HUMAN:AF-P24071-F1	IMMUNOGLOBULIN ALPHA FC RECEPTOR;
591	fazy-A	04:04:00	04:00:00	83	706	4	PDB	HUMAN:AF-O14523-F1	PHOSPHOLIPID TRANSFER PROTEIN C2CD2L;
592	e84s-A	04:04:00	03:08:00	90	578	6	PDB	HUMAN:AF-Q969N2-F1	GPI TRANSAMIDASE COMPONENT PIG-T;
593	e36a-A	04:04:00	02:07:00	76	706	5	PDB	HUMAN:AF-Q04759-F1	PROTEIN KINASE C THETA TYPE;
594	e6f9-A	04:04:00	04:04:00	93	225	6	PDB	HUMAN:AF-Q99819-F1	RHO GDP-DISSOCIATION INHIBITOR 3;
595	fg7r-A	04:04:00	03:05:00	96	1690	9	PDB	HUMAN:AF-Q12756-F1	KINESIN-LIKE PROTEIN KIF1A;
596	e3yz-A	04:04:00	04:04:00	84	238	5	PDB	HUMAN:AF-Q8ND94-F1	LRRN4 C-TERMINAL-LIKE PROTEIN;
597	e2nz-A	04:04:00	03:06:00	85	213	7	PDB	HUMAN:AF-Q9UJG1-F1	MOTILE SPERM DOMAIN-CONTAINING PROTEIN 1;
598	e5xg-A	04:04:00	03:07:00	80	1400	13	PDB	HUMAN:AF-Q8WZ42-F1	64 TITIN;
599	ezm9-A	04:04:00	04:03:00	80	1400	5	PDB	HUMAN:AF-Q8WZ42-F1	18 TITIN;
600	e1jl-A	04:04:00	03:06:00	83	1400	11	PDB	HUMAN:AF-Q8WZ42-F6	7 TITIN;
601	fdrm-A	04:04:00	03:00:00	82	330	7	PDB	HUMAN:AF-P01857-F1	IMMUNOGLOBULIN HEAVY CONSTANT GAMMA 1;
602	e74g-A	04:04:00	03:06:00	73	1400	8	PDB	HUMAN:AF-Q8NDA2-F9	HEMICENTIN-2;
603	e6ws-A	04:04:00	04:03:00	76	1400	9	PDB	HUMAN:AF-Q9NR99-F8	MATRIX-REMODELING-ASSOCIATED PROTEIN 5;
604	fdnw-A	04:04:00	03:03:00	77	1400	8	PDB	HUMAN:AF-P98160-F5	BASEMENT MEMBRANE-SPECIFIC HEPARAN SULFATE PROTEO
605	ezgv-A	04:04:00	03:08:00	82	1400	6	PDB	HUMAN:AF-Q96RW7-F1	HEMICENTIN-1;
606	e69f-A	04:04:00	04:05:00	82	1400	1	PDB	HUMAN:AF-Q8WZ42-F9	6 TITIN;
607	fg1d-A	04:04:00	03:06:00	75	1138	11	PDB	HUMAN:AF-P35590-F1	TYROSINE-PROTEIN KINASE RECEPTOR TIE-1;
608	faoo-A	04:04:00	04:01:00	79	1400	5	PDB	HUMAN:AF-Q8WZ42-F1	13 TITIN;
609	ezet-A	04:04:00	05:01:00	87	1697	5	PDB	HUMAN:AF-Q9NZM3-F1	INTERSECTIN-2;
610	fc0m-A	04:04:00	05:00:00	80	1400	3	PDB	HUMAN:AF-Q8WZ42-F9	3 TITIN;
611	fc96-A	04:04:00	04:02:00	81	1400	4	PDB	HUMAN:AF-Q8WZ42-F1	36 TITIN;
612	e1zu-A	04:03:00	03:02:00	88	261	7	PDB	HUMAN:AF-P28067-F1	HLA CLASS II HISTOCOMPATIBILITY ANTIGEN, DM ALPHA
613	ezip-A	04:03:00	04:03:00	82	327	9	PDB	HUMAN:AF-Q6PCB8-F1	EMBIGIN;
614	e4p4-A	04:03:00	04:04:00	79	1400	10	PDB	HUMAN:AF-Q8WZ42-F1	9 TITIN;
615	e4y0-A	04:03:00	03:04:00	87	1170	3	PDB	HUMAN:AF-P20701-F1	INTEGRIN ALPHA-L;
616	e7n0-A	04:03:00	04:01:00	82	1400	9	PDB	HUMAN:AF-P98161-F9	POLYCYSTIN-1;
617	e762-A	04:03:00	03:09:00	87	579	10	PDB	HUMAN:AF-Q01201-F1	TRANSCRIPTION FACTOR RELB;
618	e0jt-A	04:03:00	03:07:00	78	550	6	PDB	HUMAN:AF-A6NDA9-F1	LEUCINE-RICH REPEAT, IMMUNOGLOBULIN-LIKE DOMAIN A
619	e4nm-A	04:03:00	03:01:00	83	518	10	PDB	HUMAN:AF-Q8NHP6-F1	MOTILE SPERM DOMAIN-CONTAINING PROTEIN 2;
620	fej4-A	04:03:00	03:08:00	82	235	4	PDB	HUMAN:AF-O75425-F1	MOTILE SPERM DOMAIN-CONTAINING PROTEIN 3;
621	e2wf-A	04:03:00	03:04:00	93	1454	6	PDB	HUMAN:AF-A8K2U0-F1	ALPHA-2-MACROGLOBULIN-LIKE PROTEIN 1;
622	e5ey-A	04:03:00	04:00:00	84	512	8	PDB	HUMAN:AF-Q7L804-F1	RAB11 FAMILY-INTERACTING PROTEIN 2;
623	e05z-A	04:03:00	03:03:00	85	311	2	PDB	HUMAN:AF-Q9H7M9-F1	V-TYPE IMMUNOGLOBULIN DOMAIN-CONTAINING SUPPRESSO
624	faov-A	04:03:00	03:06:00	87	1181	3	PDB	HUMAN:AF-Q13683-F1	INTEGRIN ALPHA-7;
625	e7l5-A	04:03:00	04:01:00	81	297	10	PDB	HUMAN:AF-Q5SQ64-F1	LYMPHOCYTE ANTIGEN 6 COMPLEX LOCUS PROTEIN G6F;
626	fgz2-A	04:03:00	03:04:00	82	288	11	PDB	HUMAN:AF-P33681-F1	T-LYMPHOCYTE ACTIVATION ANTIGEN CD80;
627	fbri-A	04:03:00	03:07:00	96	1816	8	PDB	HUMAN:AF-O60333-F1	KINESIN-LIKE PROTEIN KIF1B;
628	e5z1-A	04:03:00	03:09:00	84	546	8	PDB	HUMAN:AF-Q86SU0-F1	IMMUNOGLOBULIN-LIKE DOMAIN-CONTAINING RECEPTOR 1;
629	e956-A	04:03:00	03:09:00	98	679	4	PDB	HUMAN:AF-Q96PX1-F1	E3 UBIQUITIN LIGASE RNF157;
630	e890-A	04:03:00	03:09:00	83	557	10	PDB	HUMAN:AF-Q96A23-F1	COPINE-4;
631	fd1m-A	04:03:00	03:01:00	80	266	14	PDB	HUMAN:AF-P79483-F1	HLA CLASS II HISTOCOMPATIBILITY ANTIGEN, DR BETA
632	fbzm-A	04:03:00	03:00:00	78	266	13	PDB	HUMAN:AF-P01911-F1	HLA CLASS II HISTOCOMPATIBILITY ANTIGEN, DRB1 BET
633	fg30-A	04:03:00	04:09:00	77	1400	0	PDB	HUMAN:AF-Q5VST9-F2	0 OBSCURIN;
634	fg2v-A	04:03:00	04:02:00	86	1400	5	PDB	HUMAN:AF-Q8WZ42-F1	17 TITIN;
635	e7nt-A	04:03:00	03:03:00	75	1400	9	PDB	HUMAN:AF-Q9NR99-F2	MATRIX-REMODELING-ASSOCIATED PROTEIN 5;
636	e3nc-A	04:03:00	03:02:00	76	757	5	PDB	HUMAN:AF-Q96J84-F1	KIN OF IRRE-LIKE PROTEIN 1;
637	e0gt-A	04:03:00	04:01:00	79	2061	8	PDB	HUMAN:AF-Q9NZM1-F1	MYOFERLIN;
638	famg-A	04:03:00	03:09:00	82	275	6	PDB	HUMAN:AF-P0DTU3-F1	T CELL RECEPTOR ALPHA CHAIN MC.7.G5;
639	fcw7-A	04:03:00	04:04:00	83	1400	5	PDB	HUMAN:AF-Q8WZ42-F9	2 TITIN;
640	e4xl-A	04:03:00	04:01:00	76	1400	7	PDB	HUMAN:AF-Q8WZ42-F6	8 TITIN;
641	e4yq-A	04:03:00	04:00:00	83	360	8	PDB	HUMAN:AF-Q96S86-F1	HYALURONAN AND PROTEOGLYCAN LINK PROTEIN 3;
642	e0dt-A	04:03:00	03:09:00	79	1400	8	PDB	HUMAN:AF-Q5VST9-F2	3 OBSCURIN;
643	e6mh-A	04:03:00	04:09:00	81	987	6	PDB	HUMAN:AF-P54760-F1	EPHRIN TYPE-B RECEPTOR 4;
644	fboq-A	04:03:00	04:02:00	77	1400	5	PDB	HUMAN:AF-Q8WZ42-F1	10 TITIN;
645	e1lq-A	04:03:00	03:04:00	76	348	5	PDB	HUMAN:AF-Q30201-F1	HEREDITARY HEMOCHROMATOSIS PROTEIN;
646	fd9b-A	04:03:00	03:06:00	72	1400	6	PDB	HUMAN:AF-Q8NDA2-F5	HEMICENTIN-2;
647	fdup-A	04:03:00	04:01:00	81	1400	2	PDB	HUMAN:AF-Q8WZ42-F1	20 TITIN;
648	fcz2-A	04:03:00	03:02:00	79	824	8	PDB	HUMAN:AF-Q9UDY8-F1	MUCOSA-ASSOCIATED LYMPHOID TISSUE LYMPHOMA TRANSL
649	fb4u-A	04:03:00	04:09:00	79	1141	5	PDB	HUMAN:AF-Q14324-F1	MYOSIN-BINDING PROTEIN C, FAST-TYPE;
650	e25p-A	04:03:00	03:09:00	79	1400	6	PDB	HUMAN:AF-Q8WZ42-F8	7 TITIN;
651	feld-A	04:03:00	03:06:00	81	398	7	PDB	HUMAN:AF-O00241-F1	SIGNAL-REGULATORY PROTEIN BETA-1;
652	e35v-A	04:03:00	04:06:00	85	1400	9	PDB	HUMAN:AF-Q8WZ42-F7	5 TITIN;
653	e1t2-A	04:03:00	03:05:00	75	387	4	PDB	HUMAN:AF-Q9P1W8-F1	SIGNAL-REGULATORY PROTEIN GAMMA;
654	e756-A	04:03:00	04:07:00	84	1400	5	PDB	HUMAN:AF-Q8WZ42-F1	38 TITIN;
655	e7zw-A	04:03:00	03:08:00	72	1400	8	PDB	HUMAN:AF-Q8NDA2-F1	0 HEMICENTIN-2;
656	e24o-A	04:03:00	04:05:00	78	1400	5	PDB	HUMAN:AF-Q8WZ42-F1	02 TITIN;
657	e3a4-A	04:03:00	04:02:00	77	1400	9	PDB	HUMAN:AF-P98160-F1	5 BASEMENT MEMBRANE-SPECIFIC HEPARAN SULFATE PROTEO
658	feq4-A	04:03:00	05:01:00	83	1400	6	PDB	HUMAN:AF-Q8WZ42-F1	45 TITIN;
659	ezu6-A	04:03:00	03:07:00	73	333	7	PDB	HUMAN:AF-P29017-F1	T-CELL SURFACE GLYCOPROTEIN CD1C;
660	e3bs-A	04:03:00	05:00:00	82	1400	5	PDB	HUMAN:AF-Q8WZ42-F8	3 TITIN;
661	fb0b-A	04:03:00	04:07:00	77	1179	4	PDB	HUMAN:AF-Q9P2J2-F1	PROTEIN TURTLE HOMOLOG A;
662	e96b-A	04:03:00	03:01:00	75	791	7	PDB	HUMAN:AF-Q8NAC3-F1	INTERLEUKIN-17 RECEPTOR C;
663	e7uq-A	04:02:00	03:09:00	77	1639	5	PDB	HUMAN:AF-Q9UFD9-F1	RIMS-BINDING PROTEIN 3A;
664	e3el-A	04:02:00	04:00:00	81	806	5	PDB	HUMAN:AF-P22607-F1	FIBROBLAST GROWTH FACTOR RECEPTOR 3;
665	ff5j-A	04:02:00	04:00:00	87	240	7	PDB	HUMAN:AF-P09564-F1	T-CELL ANTIGEN CD7;
666	e4qp-A	04:02:00	03:04:00	78	365	6	PDB	HUMAN:AF-P55899-F1	IGG RECEPTOR FCRN LARGE SUBUNIT P51;
667	e1vq-A	04:02:00	03:06:00	72	197	7	PDB	HUMAN:AF-Q8N7X8-F1	SIGLEC FAMILY-LIKE PROTEIN 1;
668	e7e2-A	04:02:00	04:01:00	83	1400	4	PDB	HUMAN:AF-Q8WZ42-F1	33 TITIN;
669	e5pc-A	04:02:00	03:01:00	76	107	7	PDB	HUMAN:AF-P01834-F1	IMMUNOGLOBULIN KAPPA CONSTANT;
670	e40d-A	04:02:00	03:08:00	80	1400	4	PDB	HUMAN:AF-P98161-F5	POLYCYSTIN-1;
671	fdb3-A	04:02:00	02:07:00	76	796	8	PDB	HUMAN:AF-P04629-F1	HIGH AFFINITY NERVE GROWTH FACTOR RECEPTOR;
672	fd73-A	04:02:00	03:06:00	95	1826	11	PDB	HUMAN:AF-Q9NQT8-F1	KINESIN-LIKE PROTEIN KIF13B;
673	e0lo-A	04:02:00	03:08:00	92	269	7	PDB	HUMAN:AF-Q9H426-F1	REGULATING SYNAPTIC MEMBRANE EXOCYTOSIS PROTEIN 4
674	e06g-A	04:02:00	04:02:00	75	922	13	PDB	HUMAN:AF-Q9H0M0-F1	NEDD4-LIKE E3 UBIQUITIN-PROTEIN LIGASE WWP1;
675	fg9x-A	04:02:00	03:07:00	73	333	5	PDB	HUMAN:AF-P29016-F1	T-CELL SURFACE GLYCOPROTEIN CD1B;
676	e1fi-A	04:02:00	03:08:00	86	684	5	PDB	HUMAN:AF-P49221-F1	PROTEIN-GLUTAMINE GAMMA-GLUTAMYLTRANSFERASE 4;
677	ez8x-A	04:02:00	03:07:00	79	489	6	PDB	HUMAN:AF-P58335-F1	ANTHRAX TOXIN RECEPTOR 2;
678	e7u3-A	04:02:00	02:08:00	65	661	9	PDB	HUMAN:AF-Q9NQ79-F1	CARTILAGE ACIDIC PROTEIN 1;
679	ff3v-A	04:02:00	03:06:00	89	2005	10	PDB	HUMAN:AF-A6NHR9-F1	STRUCTURAL MAINTENANCE OF CHROMOSOMES FLEXIBLE HI
680	e09t-A	04:02:00	03:01:00	81	249	6	PDB	HUMAN:AF-Q9P0L0-F1	VESICLE-ASSOCIATED MEMBRANE PROTEIN-ASSOCIATED PR
681	fgv7-A	04:02:00	04:01:00	84	402	7	PDB	HUMAN:AF-Q86UW8-F1	HYALURONAN AND PROTEOGLYCAN LINK PROTEIN 4;
682	ezsf-A	04:02:00	03:06:00	80	1400	5	PDB	HUMAN:AF-Q5VST9-F2	8 OBSCURIN;
683	e7cl-A	04:02:00	03:07:00	80	435	3	PDB	HUMAN:AF-Q8N3J6-F1	CELL ADHESION MOLECULE 2;
684	fc4r-A	04:02:00	04:08:00	83	1400	6	PDB	HUMAN:AF-Q8WZ42-F1	48 TITIN;
685	e6b3-A	04:02:00	04:04:00	87	975	5	PDB	HUMAN:AF-Q96PU5-F1	E3 UBIQUITIN-PROTEIN LIGASE NEDD4-LIKE;
686	faww-A	04:02:00	04:04:00	80	1400	3	PDB	HUMAN:AF-Q8WZ42-F1	32 TITIN;
687	fdu9-A	04:02:00	03:08:00	77	1400	9	PDB	HUMAN:AF-Q8WZ42-F1	62 TITIN;
688	e8ml-A	04:02:00	03:04:00	78	1400	8	PDB	HUMAN:AF-P98160-F1	4 BASEMENT MEMBRANE-SPECIFIC HEPARAN SULFATE PROTEO
689	ffs6-A	04:02:00	04:06:00	80	1400	5	PDB	HUMAN:AF-Q8WZ42-F1	00 TITIN;
690	ff8j-A	04:02:00	04:08:00	82	1400	5	PDB	HUMAN:AF-Q8WZ42-F1	46 TITIN;
691	ezkc-A	04:02:00	04:03:00	79	1400	4	PDB	HUMAN:AF-Q8WZ42-F7	0 TITIN;
692	e4mw-A	04:02:00	04:07:00	82	1400	10	PDB	HUMAN:AF-Q8WZ42-F8	6 TITIN;
693	e1nl-A	04:02:00	04:08:00	80	1400	5	PDB	HUMAN:AF-Q8WZ42-F1	23 TITIN;
694	ez9t-A	04:02:00	03:04:00	85	377	5	PDB	HUMAN:AF-P01860-F1	IMMUNOGLOBULIN HEAVY CONSTANT GAMMA 3;
695	e3hh-A	04:02:00	03:03:00	79	358	6	PDB	HUMAN:AF-P13747-F1	HLA CLASS I HISTOCOMPATIBILITY ANTIGEN, ALPHA CHA
696	e17u-A	04:02:00	04:08:00	78	1400	3	PDB	HUMAN:AF-Q8WZ42-F1	59 TITIN;
697	e6c8-A	04:02:00	03:09:00	75	1400	12	PDB	HUMAN:AF-Q8WZ42-F3	6 TITIN;
698	e8fq-A	04:02:00	04:08:00	78	1400	9	PDB	HUMAN:AF-Q8WZ42-F2	1 TITIN;
699	e8uv-A	04:02:00	03:06:00	95	1400	8	PDB	HUMAN:AF-Q9UKZ4-F4	TENEURIN-1;
700	e8l1-A	04:02:00	04:08:00	83	1400	10	PDB	HUMAN:AF-Q8WZ42-F7	2 TITIN;
701	ffh1-A	04:02:00	04:04:00	77	1400	5	PDB	HUMAN:AF-Q8WZ42-F9	8 TITIN;
702	e94h-A	04:02:00	03:08:00	75	1400	4	PDB	HUMAN:AF-Q8WZ42-F1	30 TITIN;
703	e4ie-A	04:02:00	04:00:00	77	702	8	PDB	HUMAN:AF-P06731-F1	CARCINOEMBRYONIC ANTIGEN-RELATED CELL ADHESION MO
704	fanw-A	04:02:00	04:01:00	77	1400	12	PDB	HUMAN:AF-Q8WZ42-F3	4 TITIN;
705	e385-A	04:02:00	04:02:00	82	633	6	PDB	HUMAN:AF-Q9UBL6-F1	COPINE-7;
706	fdqh-A	04:01:00	04:06:00	90	306	9	PDB	HUMAN:AF-Q96BJ3-F1	AXIN INTERACTOR, DORSALIZATION-ASSOCIATED PROTEIN
707	fbmg-A	04:01:00	04:00:00	85	353	12	PDB	HUMAN:AF-P01876-F1	IMMUNOGLOBULIN HEAVY CONSTANT ALPHA 1;
708	e2m6-A	04:01:00	03:06:00	77	371	1	PDB	HUMAN:AF-Q9HC73-F1	CYTOKINE RECEPTOR-LIKE FACTOR 2;
709	ez9u-A	04:01:00	03:06:00	77	1052	10	PDB	HUMAN:AF-O15034-F1	RIMS-BINDING PROTEIN 2;
710	fa1r-A	04:01:00	03:02:00	79	266	14	PDB	HUMAN:AF-Q30154-F1	HLA CLASS II HISTOCOMPATIBILITY ANTIGEN, DR BETA
711	ff6c-A	04:01:00	03:02:00	74	523	8	PDB	HUMAN:AF-Q9HAT2-F1	SIALATE O-ACETYLESTERASE;
712	e3wf-A	04:01:00	03:04:00	82	1338	11	PDB	HUMAN:AF-Q96PE1-F1	ADHESION G PROTEIN-COUPLED RECEPTOR A2;
713	fddz-A	04:01:00	03:09:00	95	1198	11	PDB	HUMAN:AF-P49796-F1	REGULATOR OF G-PROTEIN SIGNALING 3;
714	e2l3-A	04:01:00	03:06:00	78	1400	9	PDB	HUMAN:AF-Q01484-F6	ANKYRIN-2;
715	fbl1-A	04:01:00	03:08:00	80	299	5	PDB	HUMAN:AF-O95685-F1	PROTEIN PHOSPHATASE 1 REGULATORY SUBUNIT 3D;
716	e7g7-A	04:01:00	04:00:00	84	887	10	PDB	HUMAN:AF-Q8NEB9-F1	PHOSPHATIDYLINOSITOL 3-KINASE CATALYTIC SUBUNIT T
717	fdzl-A	04:01:00	03:05:00	81	215	11	PDB	HUMAN:AF-Q9NY72-F1	SODIUM CHANNEL SUBUNIT BETA-3;
718	fddh-A	04:01:00	03:09:00	85	215	11	PDB	HUMAN:AF-O60487-F1	MYELIN PROTEIN ZERO-LIKE PROTEIN 2;
719	e593-A	04:01:00	04:03:00	86	1400	5	PDB	HUMAN:AF-Q8WZ42-F1	19 TITIN;
720	e76j-A	04:01:00	04:00:00	85	1000	13	PDB	HUMAN:AF-Q86YS7-F1	C2 DOMAIN-CONTAINING PROTEIN 5;
721	e4oa-A	04:01:00	03:06:00	83	951	10	PDB	HUMAN:AF-Q6P1N0-F1	COILED-COIL AND C2 DOMAIN-CONTAINING PROTEIN 1A;
722	e6le-A	04:01:00	03:08:00	76	606	7	PDB	HUMAN:AF-Q7L985-F1	LEUCINE-RICH REPEAT AND IMMUNOGLOBULIN-LIKE DOMAI
723	e5nc-A	04:01:00	03:02:00	75	106	9	PDB	HUMAN:AF-P0CF74-F1	IMMUNOGLOBULIN LAMBDA CONSTANT 6;
724	e83y-A	04:01:00	03:02:00	75	106	9	PDB	HUMAN:AF-A0M8Q6-F1	IMMUNOGLOBULIN LAMBDA CONSTANT 7;
725	fg3d-A	04:01:00	03:05:00	76	1400	12	PDB	HUMAN:AF-Q96RW7-F2	2 HEMICENTIN-1;
726	fgpv-A	04:01:00	04:05:00	91	1400	5	PDB	HUMAN:AF-Q8WZ42-F1	34 TITIN;
727	e2ok-A	04:01:00	03:08:00	86	340	9	PDB	HUMAN:AF-P01877-F1	IMMUNOGLOBULIN HEAVY CONSTANT ALPHA 2;
728	e9w5-A	04:01:00	03:02:00	75	106	11	PDB	HUMAN:AF-P0CG04-F1	IMMUNOGLOBULIN LAMBDA CONSTANT 1;
729	e5tk-A	04:01:00	03:09:00	80	1141	11	PDB	HUMAN:AF-Q00872-F1	MYOSIN-BINDING PROTEIN C, SLOW-TYPE;
730	ey9q-A	04:01:00	03:07:00	79	1400	6	PDB	HUMAN:AF-Q8WZ42-F8	9 TITIN;
731	e8gm-A	04:01:00	04:08:00	77	1400	4	PDB	HUMAN:AF-Q8WZ42-F1	57 TITIN;
732	fgo9-A	04:01:00	04:02:00	77	1400	12	PDB	HUMAN:AF-Q96RW7-F2	1 HEMICENTIN-1;
733	e34r-A	04:01:00	04:01:00	81	548	7	PDB	HUMAN:AF-Q96NZ8-F1	WAP, KAZAL, IMMUNOGLOBULIN, KUNITZ AND NTR DOMAIN
734	faul-A	04:01:00	03:08:00	78	1400	10	PDB	HUMAN:AF-Q9NR99-F3	MATRIX-REMODELING-ASSOCIATED PROTEIN 5;
735	e5vm-A	04:01:00	05:04:00	79	1400	3	PDB	HUMAN:AF-Q8WZ42-F1	53 TITIN;
736	e5l3-A	04:01:00	04:02:00	77	1400	3	PDB	HUMAN:AF-Q8WZ42-F8	8 TITIN;
737	e9fm-A	04:01:00	03:06:00	79	1391	6	PDB	HUMAN:AF-P98160-F1	6 BASEMENT MEMBRANE-SPECIFIC HEPARAN SULFATE PROTEO
738	e62s-A	04:01:00	04:00:00	78	1400	6	PDB	HUMAN:AF-Q8WZ42-F2	8 TITIN;
739	e3z5-A	04:01:00	03:07:00	77	1400	9	PDB	HUMAN:AF-Q8WZ42-F4	3 TITIN;
740	e7r6-A	04:01:00	05:06:00	76	1400	7	PDB	HUMAN:AF-Q9NR99-F5	MATRIX-REMODELING-ASSOCIATED PROTEIN 5;
741	ffg1-A	04:01:00	03:04:00	79	1350	13	PDB	HUMAN:AF-Q8WZ42-F1	66 TITIN;
742	e95m-A	04:01:00	04:01:00	84	555	7	PDB	HUMAN:AF-P14222-F1	PERFORIN-1;
743	ezb0-A	04:01:00	05:00:00	81	984	5	PDB	HUMAN:AF-P54762-F1	EPHRIN TYPE-B RECEPTOR 1;
744	e9qo-A	04:01:00	03:08:00	79	1400	6	PDB	HUMAN:AF-Q5VST9-F3	1 OBSCURIN;
745	e3nb-A	04:01:00	04:02:00	76	1400	8	PDB	HUMAN:AF-Q8WZ42-F9	4 TITIN;
746	fbid-A	04:01:00	04:00:00	83	1400	5	PDB	HUMAN:AF-Q8WZ42-F1	21 TITIN;
747	e6hu-A	04:01:00	03:08:00	81	282	5	PDB	HUMAN:AF-Q8IYS5-F1	OSTEOCLAST-ASSOCIATED IMMUNOGLOBULIN-LIKE RECEPTO
748	e0e5-A	04:01:00	04:05:00	77	1400	8	PDB	HUMAN:AF-Q5VST9-F2	2 OBSCURIN;
749	fcak-A	04:01:00	04:00:00	77	1400	6	PDB	HUMAN:AF-Q8WZ42-F3	1 TITIN;
750	fdne-A	04:01:00	03:04:00	76	1400	9	PDB	HUMAN:AF-Q8WZ42-F3	8 TITIN;
751	e3n4-A	04:01:00	04:03:00	79	1400	5	PDB	HUMAN:AF-Q8WZ42-F1	24 TITIN;
752	e7bs-A	04:01:00	03:08:00	76	1400	5	PDB	HUMAN:AF-Q8WZ42-F1	50 TITIN;
753	e0ib-A	04:01:00	03:07:00	76	1400	8	PDB	HUMAN:AF-Q8WZ42-F4	1 TITIN;
754	e11v-A	04:01:00	04:03:00	84	1400	8	PDB	HUMAN:AF-O75445-F3	USHERIN;
755	fb4a-A	04:01:00	04:03:00	82	1400	5	PDB	HUMAN:AF-Q8WZ42-F1	44 TITIN;
756	fdst-A	04:01:00	04:04:00	88	578	7	PDB	HUMAN:AF-Q13651-F1	INTERLEUKIN-10 RECEPTOR SUBUNIT ALPHA;
757	e2f8-A	04:00:00	04:00:00	77	638	5	PDB	HUMAN:AF-P10912-F1	GROWTH HORMONE RECEPTOR;
758	e9uc-A	04:00:00	03:03:00	80	1482	6	PDB	HUMAN:AF-P20742-F1	PREGNANCY ZONE PROTEIN;
759	e5fq-A	04:00:00	04:05:00	86	1102	12	PDB	HUMAN:AF-P48736-F1	PHOSPHATIDYLINOSITOL 4,5-BISPHOSPHATE 3-KINASE CA
760	fawc-A	04:00:00	03:04:00	80	538	9	PDB	HUMAN:AF-Q92692-F1	NECTIN-2;
761	fc7r-A	04:00:00	03:07:00	74	336	8	PDB	HUMAN:AF-Q15762-F1	CD226 ANTIGEN;
762	fc4a-A	04:00:00	03:04:00	92	1433	1	PDB	HUMAN:AF-A0A0G2JMS	6-F1 UNCHARACTERIZED PROTEIN;
763	e87b-A	04:00:00	03:08:00	84	551	8	PDB	HUMAN:AF-Q04206-F1	TRANSCRIPTION FACTOR P65;
764	eze9-A	04:00:00	04:00:00	85	756	6	PDB	HUMAN:AF-P51178-F1	1-PHOSPHATIDYLINOSITOL 4,5-BISPHOSPHATE PHOSPHODI
765	e7oa-A	04:00:00	04:06:00	80	521	13	PDB	HUMAN:AF-Q13950-F1	RUNT-RELATED TRANSCRIPTION FACTOR 2;
766	e2qy-A	04:00:00	04:00:00	80	335	5	PDB	HUMAN:AF-P15813-F1	ANTIGEN-PRESENTING GLYCOPROTEIN CD1D;
767	e8zu-A	04:00:00	04:07:00	82	343	5	PDB	HUMAN:AF-Q7Z6M3-F1	ALLERGIN-1;
768	e821-A	04:00:00	04:00:00	100	625	7	PDB	HUMAN:AF-Q6ISB3-F1	GRAINYHEAD-LIKE PROTEIN 2 HOMOLOG;
769	fbqc-A	04:00:00	03:09:00	79	1400	11	PDB	HUMAN:AF-Q8WZ42-F6	5 TITIN;
770	e9t2-A	04:00:00	03:06:00	75	1400	8	PDB	HUMAN:AF-Q5VST9-F2	4 OBSCURIN;
771	fgme-A	04:00:00	03:04:00	74	344	8	PDB	HUMAN:AF-Q9P121-F1	NEUROTRIMIN;
772	fdb1-A	04:00:00	03:08:00	80	757	5	PDB	HUMAN:AF-Q9HCE7-F1	E3 UBIQUITIN-PROTEIN LIGASE SMURF1;
773	fbl9-A	04:00:00	03:09:00	77	1400	8	PDB	HUMAN:AF-Q8WZ42-F4	4 TITIN;
774	e3nv-A	04:00:00	04:05:00	80	1400	3	PDB	HUMAN:AF-Q8WZ42-F7	3 TITIN;
775	eztm-A	04:00:00	04:04:00	76	1400	7	PDB	HUMAN:AF-Q8WZ42-F1	52 TITIN;
776	e86a-A	04:00:00	03:07:00	79	1400	6	PDB	HUMAN:AF-Q5VST9-F2	6 OBSCURIN;
777	e5js-A	04:00:00	04:00:00	76	1400	11	PDB	HUMAN:AF-Q8WZ42-F3	2 TITIN;
778	ezo5-A	04:00:00	05:00:00	82	1036	2	PDB	HUMAN:AF-Q9UF33-F1	EPHRIN TYPE-A RECEPTOR 6;
779	e9nv-A	04:00:00	03:04:00	77	1400	8	PDB	HUMAN:AF-Q8NDA2-F3	HEMICENTIN-2;
780	e7kj-A	04:00:00	04:02:00	76	1400	4	PDB	HUMAN:AF-Q8WZ42-F1	35 TITIN;
781	e8ul-A	04:00:00	03:05:00	78	1400	5	PDB	HUMAN:AF-Q8WZ42-F1	25 TITIN;
782	e55j-A	04:00:00	04:01:00	75	1400	9	PDB	HUMAN:AF-Q96RW7-F3	HEMICENTIN-1;
783	fgps-A	04:00:00	04:02:00	80	1400	8	PDB	HUMAN:AF-Q8WZ42-F9	0 TITIN;
784	fc1a-A	04:00:00	03:03:00	77	366	12	PDB	HUMAN:AF-P10321-F1	HLA CLASS I HISTOCOMPATIBILITY ANTIGEN, C ALPHA C
785	e1zo-A	04:00:00	05:01:00	80	1400	3	PDB	HUMAN:AF-Q8WZ42-F1	60 TITIN;
786	fcxc-A	04:00:00	04:02:00	79	1400	11	PDB	HUMAN:AF-Q8WZ42-F2	6 TITIN;
787	e8gp-A	04:00:00	04:04:00	83	1400	4	PDB	HUMAN:AF-Q8WZ42-F1	43 TITIN;
788	e5oe-A	04:00:00	04:02:00	78	1400	3	PDB	HUMAN:AF-Q8WZ42-F1	11 TITIN;
789	fd3a-A	04:00:00	03:07:00	76	1400	7	PDB	HUMAN:AF-Q8WZ42-F3	0 TITIN;
790	fce1-A	04:00:00	04:03:00	80	1400	6	PDB	HUMAN:AF-Q8WZ42-F8	5 TITIN;
791	e876-A	04:00:00	05:04:00	75	1400	12	PDB	HUMAN:AF-Q96RW7-F1	8 HEMICENTIN-1;
792	fbtf-A	04:00:00	03:06:00	73	869	12	PDB	HUMAN:AF-O15146-F1	MUSCLE, SKELETAL RECEPTOR TYROSINE-PROTEIN KINASE
793	e07j-A	04:00:00	03:06:00	79	1400	6	PDB	HUMAN:AF-Q5VST9-F2	9 OBSCURIN;
794	e4fk-A	04:00:00	03:08:00	77	1400	8	PDB	HUMAN:AF-Q8WZ42-F4	6 TITIN;
795	fbns-A	04:00:00	04:03:00	85	1400	6	PDB	HUMAN:AF-Q8WZ42-F8	4 TITIN;
796	e01g-A	04:00:00	04:06:00	73	1070	11	PDB	HUMAN:AF-Q13308-F1	INACTIVE TYROSINE-PROTEIN KINASE 7;
797	ffii-A	03:09:00	03:05:00	86	851	9	PDB	HUMAN:AF-Q03167-F1	TRANSFORMING GROWTH FACTOR BETA RECEPTOR TYPE 3;
798	fc1k-A	03:09:00	03:09:00	81	226	4	PDB	HUMAN:AF-F2Z333-F1	FIBRONECTIN TYPE III DOMAIN-CONTAINING PROTEIN 10
799	fgg9-A	03:09:00	04:03:00	87	580	13	PDB	HUMAN:AF-Q8WVR3-F1	TRAFFICKING PROTEIN PARTICLE COMPLEX SUBUNIT 14;
800	e16f-A	03:09:00	03:05:00	75	822	1	PDB	HUMAN:AF-Q16620-F1	BDNF/NT-3 GROWTH FACTORS RECEPTOR;
801	fb7r-A	03:09:00	03:06:00	82	194	4	PDB	HUMAN:AF-Q6UXZ3-F1	CMRF35-LIKE MOLECULE 5;
802	e1ak-A	03:09:00	04:01:00	98	745	6	PDB	HUMAN:AF-Q05996-F1	ZONA PELLUCIDA SPERM-BINDING PROTEIN 2;
803	e9rp-A	03:09:00	04:00:00	91	1676	3	PDB	HUMAN:AF-P01031-F1	COMPLEMENT C5;
804	fenm-A	03:09:00	03:02:00	78	173	6	PDB	HUMAN:AF-P51571-F1	TRANSLOCON-ASSOCIATED PROTEIN SUBUNIT DELTA;
805	e71d-A	03:09:00	04:03:00	83	1315	7	PDB	HUMAN:AF-Q68CZ1-F1	PROTEIN FANTOM;
806	ffoq-A	03:09:00	04:02:00	77	290	5	PDB	HUMAN:AF-Q8TDQ1-F1	CMRF35-LIKE MOLECULE 1;
807	e8ko-A	03:09:00	03:09:00	79	878	6	PDB	HUMAN:AF-Q6DN12-F1	MULTIPLE C2 AND TRANSMEMBRANE DOMAIN-CONTAINING P
808	e6ar-A	03:09:00	04:00:00	83	959	4	PDB	HUMAN:AF-Q86Y38-F1	XYLOSYLTRANSFERASE 1;
809	e5i5-A	03:09:00	04:07:00	81	977	1	PDB	HUMAN:AF-Q96PE3-F1	INOSITOL POLYPHOSPHATE-4-PHOSPHATASE TYPE I A;
810	e8ly-A	03:09:00	04:06:00	83	294	2	PDB	HUMAN:AF-Q9HBV2-F1	SPERM ACROSOME MEMBRANE-ASSOCIATED PROTEIN 1;
811	e1jc-A	03:09:00	03:05:00	82	1439	13	PDB	HUMAN:AF-Q15262-F1	RECEPTOR-TYPE TYROSINE-PROTEIN PHOSPHATASE KAPPA;
812	fbh1-A	03:09:00	04:03:00	83	1095	5	PDB	HUMAN:AF-Q15111-F1	INACTIVE PHOSPHOLIPASE C-LIKE PROTEIN 1;
813	e9gx-A	03:09:00	04:00:00	79	1189	10	PDB	HUMAN:AF-Q5VWQ8-F1	DISABLED HOMOLOG 2-INTERACTING PROTEIN;
814	fd8i-A	03:09:00	04:05:00	85	811	4	PDB	HUMAN:AF-Q7L0X0-F1	TLR4 INTERACTOR WITH LEUCINE RICH REPEATS;
815	e5o1-A	03:09:00	03:02:00	76	1218	9	PDB	HUMAN:AF-P78504-F1	PROTEIN JAGGED-1;
816	fcgn-A	03:09:00	04:04:00	83	608	6	PDB	HUMAN:AF-Q86YW0-F1	1-PHOSPHATIDYLINOSITOL 4,5-BISPHOSPHATE PHOSPHODI
817	fa1h-A	03:09:00	04:04:00	88	723	3	PDB	HUMAN:AF-Q8IWZ5-F1	TRIPARTITE MOTIF-CONTAINING PROTEIN 42;
818	e08k-A	03:09:00	04:01:00	84	762	4	PDB	HUMAN:AF-Q9BRC7-F1	1-PHOSPHATIDYLINOSITOL 4,5-BISPHOSPHATE PHOSPHODI
819	e0mx-A	03:09:00	03:04:00	84	1445	2	PDB	HUMAN:AF-Q68CZ2-F1	TENSIN-3;
820	fb7w-A	03:09:00	03:09:00	77	229	8	PDB	HUMAN:AF-P40259-F1	B-CELL ANTIGEN RECEPTOR COMPLEX-ASSOCIATED PROTEI
821	fc9z-A	03:09:00	02:09:00	68	729	6	PDB	HUMAN:AF-Q16348-F1	SOLUTE CARRIER FAMILY 15 MEMBER 2;
822	e1ju-A	03:09:00	03:04:00	80	2459	11	PDB	HUMAN:AF-Q7Z442-F1	POLYCYSTIC KIDNEY DISEASE PROTEIN 1-LIKE 2;
823	e744-A	03:09:00	03:03:00	83	286	6	PDB	HUMAN:AF-P43307-F1	TRANSLOCON-ASSOCIATED PROTEIN SUBUNIT ALPHA;
824	e8nr-A	03:09:00	03:05:00	76	640	12	PDB	HUMAN:AF-Q02297-F1	PRO-NEUREGULIN-1, MEMBRANE-BOUND ISOFORM;
825	fc8l-A	03:09:00	04:04:00	74	1400	12	PDB	HUMAN:AF-Q8WZ42-F2	2 TITIN;
826	fbe0-A	03:09:00	03:08:00	76	1400	8	PDB	HUMAN:AF-Q8WZ42-F4	0 TITIN;
827	fg58-A	03:09:00	03:08:00	78	1400	10	PDB	HUMAN:AF-Q8WZ42-F2	7 TITIN;
828	fex4-A	03:09:00	04:03:00	86	310	6	PDB	HUMAN:AF-Q9BX67-F1	JUNCTIONAL ADHESION MOLECULE C;
829	e9k8-A	03:09:00	03:07:00	74	1400	9	PDB	HUMAN:AF-Q8WZ42-F5	TITIN;
830	e6hw-A	03:09:00	04:00:00	77	1400	14	PDB	HUMAN:AF-Q8WZ42-F2	9 TITIN;
831	ff9s-A	03:09:00	03:09:00	76	1400	9	PDB	HUMAN:AF-Q8WZ42-F4	2 TITIN;
832	e71q-A	03:09:00	05:02:00	72	1400	6	PDB	HUMAN:AF-Q8NDA2-F6	HEMICENTIN-2;
833	fdmn-A	03:09:00	03:05:00	72	1400	8	PDB	HUMAN:AF-Q8WZ42-F2	0 TITIN;
834	e2nn-A	03:09:00	04:04:00	83	1400	6	PDB	HUMAN:AF-Q8WZ42-F1	14 TITIN;
835	e82s-A	03:09:00	04:04:00	77	1400	4	PDB	HUMAN:AF-Q8WZ42-F3	5 TITIN;
836	fc36-A	03:09:00	04:01:00	75	1400	9	PDB	HUMAN:AF-Q96RW7-F4	HEMICENTIN-1;
837	fdge-A	03:09:00	03:07:00	81	1400	6	PDB	HUMAN:AF-Q9NR99-F1	MATRIX-REMODELING-ASSOCIATED PROTEIN 5;
838	e1ke-A	03:09:00	04:03:00	77	1400	6	PDB	HUMAN:AF-Q5VST9-F3	0 OBSCURIN;
839	e3wz-A	03:09:00	04:02:00	75	1400	9	PDB	HUMAN:AF-Q96RW7-F2	HEMICENTIN-1;
840	fby7-A	03:08:00	03:06:00	77	201	4	PDB	HUMAN:AF-A8K4G0-F1	CMRF35-LIKE MOLECULE 7;
841	e2gl-A	03:08:00	04:06:00	85	1887	8	PDB	HUMAN:AF-Q8TEM1-F1	NUCLEAR PORE MEMBRANE GLYCOPROTEIN 210;
842	e3cf-A	03:08:00	03:08:00	83	2139	2	PDB	HUMAN:AF-P0C091-F1	FRAS1-RELATED EXTRACELLULAR MATRIX PROTEIN 3;
843	e25n-A	03:08:00	03:08:00	83	900	4	PDB	HUMAN:AF-Q00653-F1	NUCLEAR FACTOR NF-KAPPA-B P100 SUBUNIT;
844	e2uh-A	03:08:00	03:06:00	86	715	10	PDB	HUMAN:AF-Q8IWZ6-F1	BARDET-BIEDL SYNDROME 7 PROTEIN;
845	e3j2-A	03:08:00	04:02:00	86	1888	8	PDB	HUMAN:AF-Q5VU65-F1	NUCLEAR PORE MEMBRANE GLYCOPROTEIN 210-LIKE;
846	e194-A	03:08:00	03:03:00	80	726	10	PDB	HUMAN:AF-Q8NBF2-F1	NHL REPEAT-CONTAINING PROTEIN 2;
847	fgqy-A	03:08:00	03:08:00	83	218	12	PDB	HUMAN:AF-Q07699-F1	SODIUM CHANNEL SUBUNIT BETA-1;
848	ezqf-A	03:08:00	04:00:00	80	278	8	PDB	HUMAN:AF-Q8WX77-F1	INSULIN-LIKE GROWTH FACTOR-BINDING PROTEIN-LIKE 1
849	ey9e-A	03:08:00	03:09:00	75	1400	8	PDB	HUMAN:AF-Q8WXG9-F1	0 ADHESION G-PROTEIN COUPLED RECEPTOR V1;
850	e1ux-A	03:08:00	03:09:00	88	890	7	PDB	HUMAN:AF-Q14693-F1	PHOSPHATIDATE PHOSPHATASE LPIN1;
851	e88i-A	03:08:00	03:09:00	87	946	3	PDB	HUMAN:AF-Q96MK2-F1	RIPOR FAMILY MEMBER 3;
852	e9fz-A	03:08:00	03:07:00	84	537	7	PDB	HUMAN:AF-Q99829-F1	COPINE-1;
853	e0f7-A	03:08:00	03:05:00	82	228	10	PDB	HUMAN:AF-Q8IWT1-F1	SODIUM CHANNEL SUBUNIT BETA-4;
854	e1w6-A	03:08:00	04:03:00	83	282	5	PDB	HUMAN:AF-Q96BF3-F1	TRANSMEMBRANE AND IMMUNOGLOBULIN DOMAIN-CONTAININ
855	e68i-A	03:08:00	03:01:00	79	612	6	PDB	HUMAN:AF-Q8TB96-F1	T-CELL IMMUNOMODULATORY PROTEIN;
856	e5qj-A	03:08:00	03:02:00	77	119	5	PDB	HUMAN:AF-P61769-F1	BETA-2-MICROGLOBULIN;
857	e0uh-A	03:08:00	03:08:00	79	279	4	PDB	HUMAN:AF-Q9H7J1-F1	PROTEIN PHOSPHATASE 1 REGULATORY SUBUNIT 3E;
858	fcx7-A	03:08:00	04:04:00	82	859	10	PDB	HUMAN:AF-Q12979-F1	ACTIVE BREAKPOINT CLUSTER REGION-RELATED PROTEIN;
859	e0b8-A	03:08:00	03:07:00	85	849	5	PDB	HUMAN:AF-Q68DD2-F1	CYTOSOLIC PHOSPHOLIPASE A2 ZETA;
860	e1jr-A	03:08:00	03:06:00	78	685	5	PDB	HUMAN:AF-Q9NR61-F1	DELTA-LIKE PROTEIN 4;
861	e0zq-A	03:08:00	03:09:00	82	1283	9	PDB	HUMAN:AF-Q6WKZ4-F1	RAB11 FAMILY-INTERACTING PROTEIN 1;
862	fg73-A	03:08:00	03:08:00	73	1400	7	PDB	HUMAN:AF-Q15772-F1	STRIATED MUSCLE PREFERENTIALLY EXPRESSED PROTEIN
863	fcp4-A	03:08:00	04:05:00	73	1400	7	PDB	HUMAN:AF-Q8NDA2-F1	9 HEMICENTIN-2;
864	e0cv-A	03:08:00	03:07:00	73	1400	7	PDB	HUMAN:AF-Q96RW7-F2	0 HEMICENTIN-1;
865	e1jj-A	03:08:00	03:07:00	74	1400	5	PDB	HUMAN:AF-Q5VST9-F1	8 OBSCURIN;
866	fgb7-A	03:08:00	03:08:00	77	842	8	PDB	HUMAN:AF-Q6MZW2-F1	FOLLISTATIN-RELATED PROTEIN 4;
867	fc6n-A	03:08:00	04:07:00	75	1400	7	PDB	HUMAN:AF-Q8WZ42-F1	51 TITIN;
868	e2j8-A	03:08:00	03:08:00	75	1400	4	PDB	HUMAN:AF-Q5VST9-F2	1 OBSCURIN;
869	fd2v-A	03:08:00	03:09:00	80	504	1	PDB	HUMAN:AF-Q8N441-F1	FIBROBLAST GROWTH FACTOR RECEPTOR-LIKE 1;
870	e9b5-A	03:08:00	04:03:00	79	593	6	PDB	HUMAN:AF-Q9HCH3-F1	COPINE-5;
871	fd97-A	03:08:00	04:01:00	78	1400	9	PDB	HUMAN:AF-Q8WZ42-F2	4 TITIN;
872	fbzq-A	03:08:00	04:00:00	74	1259	8	PDB	HUMAN:AF-Q8NDA2-F2	0 HEMICENTIN-2;
873	e45l-A	03:08:00	04:05:00	83	1400	6	PDB	HUMAN:AF-Q15772-F4	STRIATED MUSCLE PREFERENTIALLY EXPRESSED PROTEIN
874	ff1z-A	03:08:00	04:06:00	76	1400	8	PDB	HUMAN:AF-Q9NR99-F4	MATRIX-REMODELING-ASSOCIATED PROTEIN 5;
875	e9vi-A	03:08:00	04:03:00	74	1320	9	PDB	HUMAN:AF-Q86TC9-F1	MYOPALLADIN;
876	fbsb-A	03:08:00	04:08:00	77	1386	4	PDB	HUMAN:AF-O60229-F9	KALIRIN;
877	e9xa-A	03:08:00	04:00:00	79	1400	4	PDB	HUMAN:AF-Q8WZ42-F1	TITIN;
878	e9xp-A	03:08:00	03:08:00	79	1685	8	PDB	HUMAN:AF-P52179-F1	MYOMESIN-1;
879	fdom-A	03:08:00	04:01:00	77	1400	14	PDB	HUMAN:AF-Q8WZ42-F3	9 TITIN;
880	e9he-A	03:08:00	03:08:00	75	1119	8	PDB	HUMAN:AF-Q6UXM1-F1	LEUCINE-RICH REPEATS AND IMMUNOGLOBULIN-LIKE DOMA
881	e9xk-A	03:08:00	03:02:00	76	1400	12	PDB	HUMAN:AF-Q8WZ42-F1	65 TITIN;
882	e1gw-A	03:08:00	04:05:00	80	1400	6	PDB	HUMAN:AF-Q8WZ42-F1	26 TITIN;
883	fc6c-A	03:08:00	04:03:00	75	1400	8	PDB	HUMAN:AF-P98160-F4	BASEMENT MEMBRANE-SPECIFIC HEPARAN SULFATE PROTEO
884	e3kd-A	03:08:00	03:06:00	83	613	10	PDB	HUMAN:AF-Q969P0-F1	IMMUNOGLOBULIN SUPERFAMILY MEMBER 8;
885	fdce-A	03:08:00	04:05:00	76	1400	5	PDB	HUMAN:AF-Q8WZ42-F1	4 TITIN;
886	ff32-A	03:08:00	04:01:00	78	1400	6	PDB	HUMAN:AF-Q8WZ42-F2	5 TITIN;
887	e1ub-A	03:08:00	04:06:00	73	1400	5	PDB	HUMAN:AF-Q8WZ42-F1	3 TITIN;
888	fahu-A	03:08:00	03:06:00	73	1400	7	PDB	HUMAN:AF-Q96RW7-F1	9 HEMICENTIN-1;
889	e0bh-A	03:08:00	04:05:00	78	1400	9	PDB	HUMAN:AF-Q5VST9-F2	7 OBSCURIN;
890	e55v-A	03:08:00	04:01:00	77	1400	8	PDB	HUMAN:AF-Q8WZ42-F4	7 TITIN;
891	fccj-A	03:08:00	04:03:00	78	1400	15	PDB	HUMAN:AF-Q8WZ42-F4	5 TITIN;
892	fe4c-A	03:08:00	04:04:00	74	1400	7	PDB	HUMAN:AF-Q8WZ42-F1	5 TITIN;
893	fah9-A	03:08:00	04:04:00	77	1914	8	PDB	HUMAN:AF-Q15746-F1	MYOSIN LIGHT CHAIN KINASE, SMOOTH MUSCLE;
894	e5ri-A	03:07:00	03:04:00	85	619	7	PDB	HUMAN:AF-Q04864-F1	PROTO-ONCOGENE C-REL;
895	e6me-A	03:07:00	03:04:00	83	559	2	PDB	HUMAN:AF-Q969Y0-F1	NXPE FAMILY MEMBER 3;
896	e9qt-A	03:07:00	03:06:00	90	658	11	PDB	HUMAN:AF-P17813-F1	ENDOGLIN;
897	e1n9-A	03:07:00	04:05:00	83	1400	6	PDB	HUMAN:AF-O75592-F1	1 E3 UBIQUITIN-PROTEIN LIGASE MYCBP2;
898	e21u-A	03:07:00	04:02:00	82	870	10	PDB	HUMAN:AF-O00308-F1	NEDD4-LIKE E3 UBIQUITIN-PROTEIN LIGASE WWP2;
899	e0uk-A	03:07:00	03:01:00	82	622	4	PDB	HUMAN:AF-Q96LX7-F1	COILED-COIL DOMAIN-CONTAINING PROTEIN 17;
900	fc7p-A	03:07:00	04:05:00	91	607	11	PDB	HUMAN:AF-Q86UP6-F1	CUB AND ZONA PELLUCIDA-LIKE DOMAIN-CONTAINING PRO
901	e1kg-A	03:07:00	03:05:00	76	1139	4	PDB	HUMAN:AF-Q9UJF2-F1	RAS GTPASE-ACTIVATING PROTEIN NGAP;
902	e5sk-A	03:07:00	04:00:00	96	1130	1	PDB	HUMAN:AF-P23229-F1	INTEGRIN ALPHA-6;
903	fbrc-A	03:07:00	03:09:00	90	626	3	PDB	HUMAN:AF-Q8TE85-F1	GRAINYHEAD-LIKE PROTEIN 3 HOMOLOG;
904	e1p9-A	03:07:00	04:04:00	80	820	6	PDB	HUMAN:AF-Q5R3F8-F1	PROTEIN PHOSPHATASE 1 REGULATORY SUBUNIT 29;
905	ffa2-A	03:07:00	04:02:00	82	2073	6	PDB	HUMAN:AF-Q5JSL3-F1	DEDICATOR OF CYTOKINESIS PROTEIN 11;
906	fe9w-A	03:07:00	04:03:00	89	1223	8	PDB	HUMAN:AF-Q6ZS17-F1	RHO FAMILY-INTERACTING CELL POLARIZATION REGULATO
907	e44c-A	03:07:00	03:07:00	91	332	11	PDB	HUMAN:AF-Q99675-F1	CELL GROWTH REGULATOR WITH RING FINGER DOMAIN PRO
908	fej0-A	03:07:00	03:02:00	86	958	3	PDB	HUMAN:AF-Q8N5R6-F1	COILED-COIL DOMAIN-CONTAINING PROTEIN 33;
909	fffu-A	03:07:00	04:06:00	95	282	4	PDB	HUMAN:AF-Q7Z7D3-F1	V-SET DOMAIN-CONTAINING T-CELL ACTIVATION INHIBIT
910	ezfe-A	03:07:00	03:07:00	79	984	3	PDB	HUMAN:AF-Q16513-F1	SERINE/THREONINE-PROTEIN KINASE N2;
911	faxo-A	03:07:00	04:02:00	82	1286	5	PDB	HUMAN:AF-Q96KN7-F1	X-LINKED RETINITIS PIGMENTOSA GTPASE REGULATOR-IN
912	e5bi-A	03:07:00	03:07:00	75	223	5	PDB	HUMAN:AF-P16410-F1	CYTOTOXIC T-LYMPHOCYTE PROTEIN 4;
913	e1xk-A	03:07:00	04:03:00	82	1400	5	PDB	HUMAN:AF-Q96N23-F5	CILIA- AND FLAGELLA-ASSOCIATED PROTEIN 54;
914	e6om-A	03:07:00	03:09:00	85	204	7	PDB	HUMAN:AF-P52565-F1	RHO GDP-DISSOCIATION INHIBITOR 1;
915	ezsq-A	03:07:00	03:03:00	84	281	6	PDB	HUMAN:AF-Q6ISU1-F1	PRE T-CELL ANTIGEN RECEPTOR ALPHA;
916	e53b-A	03:07:00	04:03:00	80	748	6	PDB	HUMAN:AF-Q9HAU4-F1	E3 UBIQUITIN-PROTEIN LIGASE SMURF2;
917	fbly-A	03:07:00	05:00:00	87	759	6	PDB	HUMAN:AF-Q7Z4K8-F1	TRIPARTITE MOTIF-CONTAINING PROTEIN 46;
918	e0h7-A	03:07:00	03:03:00	80	365	10	PDB	HUMAN:AF-P04439-F1	HLA CLASS I HISTOCOMPATIBILITY ANTIGEN, A ALPHA C
919	fa32-A	03:07:00	04:06:00	72	1400	7	PDB	HUMAN:AF-Q8NDA2-F1	6 HEMICENTIN-2;
920	fe63-A	03:07:00	04:03:00	80	1400	6	PDB	HUMAN:AF-Q15772-F2	STRIATED MUSCLE PREFERENTIALLY EXPRESSED PROTEIN
921	fex3-A	03:07:00	04:05:00	79	1368	3	PDB	HUMAN:AF-Q5VST9-F3	4 OBSCURIN;
922	ff0m-A	03:07:00	04:07:00	75	1400	9	PDB	HUMAN:AF-Q8WZ42-F1	47 TITIN;
923	fa56-A	03:07:00	04:02:00	78	1400	4	PDB	HUMAN:AF-Q8WZ42-F1	55 TITIN;
924	e6vn-A	03:07:00	03:03:00	68	1400	6	PDB	HUMAN:AF-Q9NR99-F7	MATRIX-REMODELING-ASSOCIATED PROTEIN 5;
925	e9qb-A	03:07:00	04:02:00	75	1400	12	PDB	HUMAN:AF-Q8WZ42-F1	8 TITIN;
926	e3he-A	03:07:00	04:03:00	77	1400	4	PDB	HUMAN:AF-P98160-F2	BASEMENT MEMBRANE-SPECIFIC HEPARAN SULFATE PROTEO
927	fad3-A	03:07:00	03:03:00	78	254	13	PDB	HUMAN:AF-P08637-F1	LOW AFFINITY IMMUNOGLOBULIN GAMMA FC REGION RECEP
928	e3br-A	03:07:00	04:01:00	81	1400	7	PDB	HUMAN:AF-Q8WZ42-F4	TITIN;
929	fcvx-A	03:07:00	03:09:00	76	1479	8	PDB	HUMAN:AF-Q92626-F1	PEROXIDASIN HOMOLOG;
930	ff0w-A	03:07:00	03:06:00	77	903	3	PDB	HUMAN:AF-Q8N9C0-F1	IMMUNOGLOBULIN SUPERFAMILY MEMBER 22;
931	e9lz-A	03:07:00	03:03:00	76	1400	12	PDB	HUMAN:AF-Q8WZ42-F1	63 TITIN;
932	e1bj-A	03:07:00	04:01:00	75	1400	4	PDB	HUMAN:AF-Q15772-F3	STRIATED MUSCLE PREFERENTIALLY EXPRESSED PROTEIN
933	faw4-A	03:07:00	04:03:00	75	1400	8	PDB	HUMAN:AF-Q8WZ42-F1	12 TITIN;
934	e7qj-A	03:07:00	04:00:00	73	1400	7	PDB	HUMAN:AF-Q8NDA2-F1	8 HEMICENTIN-2;
935	e2ap-A	03:07:00	04:06:00	76	1400	11	PDB	HUMAN:AF-Q8WZ42-F2	TITIN;
936	e9ps-A	03:07:00	03:08:00	90	426	1	PDB	HUMAN:AF-Q6BAA4-F1	FC RECEPTOR-LIKE B;
937	ffjz-A	03:07:00	04:07:00	73	986	7	PDB	HUMAN:AF-P54764-F1	EPHRIN TYPE-A RECEPTOR 4;
938	e3n8-A	03:07:00	04:01:00	75	1400	5	PDB	HUMAN:AF-Q8WZ42-F3	3 TITIN;
939	e062-A	03:07:00	04:06:00	75	1400	7	PDB	HUMAN:AF-Q5VST9-F1	OBSCURIN;
940	favc-A	03:06:00	03:04:00	82	1321	6	PDB	HUMAN:AF-Q8IWK6-F1	ADHESION G PROTEIN-COUPLED RECEPTOR A3;
941	fdoz-A	03:06:00	03:02:00	73	388	8	PDB	HUMAN:AF-P15812-F1	T-CELL SURFACE GLYCOPROTEIN CD1E, MEMBRANE-ASSOCI
942	fdrx-A	03:06:00	03:03:00	75	341	9	PDB	HUMAN:AF-Q95460-F1	MAJOR HISTOCOMPATIBILITY COMPLEX CLASS I-RELATED
943	e1c7-A	03:06:00	04:08:00	83	1437	6	PDB	HUMAN:AF-Q5VTT5-F1	MYOMESIN-3;
944	e7ev-A	03:06:00	03:02:00	82	968	7	PDB	HUMAN:AF-P19838-F1	NUCLEAR FACTOR NF-KAPPA-B P105 SUBUNIT;
945	e34v-A	03:06:00	03:05:00	71	931	13	PDB	HUMAN:AF-O95185-F1	NETRIN RECEPTOR UNC5C;
946	fdso-A	03:06:00	03:02:00	79	639	13	PDB	HUMAN:AF-Q9UJY5-F1	ADP-RIBOSYLATION FACTOR-BINDING PROTEIN GGA1;
947	e9fi-A	03:06:00	04:01:00	83	2186	8	PDB	HUMAN:AF-Q96BY6-F1	DEDICATOR OF CYTOKINESIS PROTEIN 10;
948	fa3v-A	03:06:00	04:01:00	76	193	4	PDB	HUMAN:AF-A0A2R8YFM	6-F1 OOCYTE-SECRETED PROTEIN 3;
949	ezb9-A	03:06:00	03:09:00	79	274	8	PDB	HUMAN:AF-Q9H0E2-F1	TOLL-INTERACTING PROTEIN;
950	e2l2-A	03:06:00	03:04:00	85	656	6	PDB	HUMAN:AF-Q8N309-F1	LEUCINE-RICH REPEAT-CONTAINING PROTEIN 43;
951	e39q-A	03:06:00	03:09:00	74	382	11	PDB	HUMAN:AF-Q13477-F1	MUCOSAL ADDRESSIN CELL ADHESION MOLECULE 1;
952	e0qx-A	03:06:00	03:03:00	71	199	6	PDB	HUMAN:AF-Q9Y6W8-F1	INDUCIBLE T-CELL COSTIMULATOR;
953	ezsb-A	03:06:00	04:06:00	81	924	10	PDB	HUMAN:AF-O15327-F1	INOSITOL POLYPHOSPHATE 4-PHOSPHATASE TYPE II;
954	e2zr-A	03:06:00	03:02:00	83	1406	10	PDB	HUMAN:AF-Q49AJ0-F1	PROTEIN FAM135B;
955	fgca-A	03:06:00	05:03:00	80	1259	5	PDB	HUMAN:AF-P48553-F1	TRAFFICKING PROTEIN PARTICLE COMPLEX SUBUNIT 10;
956	fbc6-A	03:06:00	04:00:00	77	367	9	PDB	HUMAN:AF-O60931-F1	CYSTINOSIN;
957	fgur-A	03:06:00	03:09:00	93	501	3	PDB	HUMAN:AF-P48549-F1	G PROTEIN-ACTIVATED INWARD RECTIFIER POTASSIUM CH
958	e6mc-A	03:06:00	03:06:00	82	557	11	PDB	HUMAN:AF-O95741-F1	COPINE-6;
959	e6uu-A	03:06:00	04:03:00	74	1274	11	PDB	HUMAN:AF-Q14896-F1	MYOSIN-BINDING PROTEIN C, CARDIAC-TYPE;
960	e9os-A	03:06:00	04:06:00	78	1463	6	PDB	HUMAN:AF-A1KZ92-F1	PEROXIDASIN-LIKE PROTEIN;
961	fec7-A	03:06:00	04:03:00	74	477	5	PDB	HUMAN:AF-Q13203-F1	MYOSIN-BINDING PROTEIN H;
962	e5kx-A	03:06:00	04:00:00	74	354	3	PDB	HUMAN:AF-A2RUH7-F1	MYOSIN-BINDING PROTEIN H-LIKE;
963	e0ic-A	03:06:00	03:03:00	77	676	0	PDB	HUMAN:AF-Q05655-F1	PROTEIN KINASE C DELTA TYPE;
964	fam3-A	03:06:00	04:03:00	73	1400	7	PDB	HUMAN:AF-Q8WZ42-F1	56 TITIN;
965	e4bq-A	03:06:00	03:09:00	77	1400	4	PDB	HUMAN:AF-Q8WZ42-F1	61 TITIN;
966	fava-A	03:06:00	04:04:00	72	1400	6	PDB	HUMAN:AF-Q8WZ42-F1	54 TITIN;
967	e892-A	03:06:00	03:07:00	79	1400	6	PDB	HUMAN:AF-Q8WZ42-F1	7 TITIN;
968	e5fz-A	03:06:00	03:08:00	73	1400	7	PDB	HUMAN:AF-Q96RW7-F1	6 HEMICENTIN-1;
969	e74a-A	03:06:00	04:03:00	73	1400	7	PDB	HUMAN:AF-Q8NDA2-F1	7 HEMICENTIN-2;
970	e0ec-A	03:06:00	04:08:00	73	1037	4	PDB	HUMAN:AF-P54756-F1	EPHRIN TYPE-A RECEPTOR 5;
971	e0x1-A	03:06:00	03:07:00	74	802	5	PDB	HUMAN:AF-P22455-F1	FIBROBLAST GROWTH FACTOR RECEPTOR 4;
972	fgia-A	03:06:00	03:04:00	73	1400	7	PDB	HUMAN:AF-Q8NDA2-F4	HEMICENTIN-2;
973	e9on-A	03:06:00	04:00:00	76	1400	4	PDB	HUMAN:AF-Q5VST9-F9	OBSCURIN;
974	fex1-A	03:06:00	03:08:00	80	1997	5	PDB	HUMAN:AF-Q9HC10-F1	OTOFERLIN;
975	ezam-A	03:06:00	04:06:00	87	2057	14	PDB	HUMAN:AF-A0AVI2-F1	FER-1-LIKE PROTEIN 5;
976	ezp4-A	03:06:00	04:07:00	79	1400	5	PDB	HUMAN:AF-Q5VST9-F2	5 OBSCURIN;
977	e2yv-A	03:06:00	03:09:00	77	1400	9	PDB	HUMAN:AF-Q5VST9-F3	3 OBSCURIN;
978	ezns-A	03:06:00	04:01:00	81	821	7	PDB	HUMAN:AF-P21802-F1	FIBROBLAST GROWTH FACTOR RECEPTOR 2;
979	fbfv-A	03:06:00	03:03:00	79	338	9	PDB	HUMAN:AF-P17693-F1	HLA CLASS I HISTOCOMPATIBILITY ANTIGEN, ALPHA CHA
980	fbn0-A	03:05:00	03:07:00	80	263	10	PDB	HUMAN:AF-P28068-F1	HLA CLASS II HISTOCOMPATIBILITY ANTIGEN, DM BETA
981	e8d8-A	03:05:00	03:04:00	71	839	7	PDB	HUMAN:AF-Q16288-F1	NT-3 GROWTH FACTOR RECEPTOR;
982	e6n2-A	03:05:00	04:01:00	85	194	7	PDB	HUMAN:AF-O95998-F1	INTERLEUKIN-18-BINDING PROTEIN;
983	fefe-A	03:05:00	03:08:00	85	1693	8	PDB	HUMAN:AF-Q4KWH8-F1	1-PHOSPHATIDYLINOSITOL 4,5-BISPHOSPHATE PHOSPHODI
984	e7ts-A	03:05:00	02:08:00	81	904	12	PDB	HUMAN:AF-Q7Z2K6-F1	ENDOPLASMIC RETICULUM METALLOPEPTIDASE 1;
985	fb1u-A	03:05:00	03:06:00	77	735	5	PDB	HUMAN:AF-Q6ZW31-F1	RHO GTPASE-ACTIVATING PROTEIN SYDE1;
986	feqz-A	03:05:00	05:03:00	85	743	2	PDB	HUMAN:AF-Q8NFI3-F1	CYTOSOLIC ENDO-BETA-N-ACETYLGLUCOSAMINIDASE;
987	e0ta-A	03:05:00	03:00:00	77	586	5	PDB	HUMAN:AF-P20700-F1	LAMIN-B1;
988	fdld-A	03:05:00	04:01:00	74	826	5	PDB	HUMAN:AF-A8MVW0-F1	PROTEIN FAM171A2;
989	e1rr-A	03:05:00	04:02:00	77	890	8	PDB	HUMAN:AF-Q5VUB5-F1	PROTEIN FAM171A1;
990	e6m4-A	03:05:00	04:04:00	84	2069	7	PDB	HUMAN:AF-Q9BZ29-F1	DEDICATOR OF CYTOKINESIS PROTEIN 9;
991	e03c-A	03:05:00	03:03:00	84	646	4	PDB	HUMAN:AF-Q9NZU1-F1	LEUCINE-RICH REPEAT TRANSMEMBRANE PROTEIN FLRT1;
992	ezdg-A	03:05:00	04:02:00	83	563	1	PDB	HUMAN:AF-Q9BST9-F1	RHOTEKIN;
993	fdjm-A	03:05:00	04:04:00	77	683	10	PDB	HUMAN:AF-P24723-F1	PROTEIN KINASE C ETA TYPE;
994	e3u4-A	03:05:00	04:09:00	73	192	7	PDB	HUMAN:AF-A1L1A6-F1	IMMUNOGLOBULIN SUPERFAMILY MEMBER 23;
995	ezfk-A	03:05:00	03:02:00	77	204	12	PDB	HUMAN:AF-Q96N03-F1	V-SET AND TRANSMEMBRANE DOMAIN-CONTAINING PROTEIN
996	e3ou-A	03:05:00	03:08:00	95	364	6	PDB	HUMAN:AF-A6NLJ0-F1	C2 CALCIUM-DEPENDENT DOMAIN-CONTAINING PROTEIN 4B
997	e5qd-A	03:05:00	03:09:00	73	1400	12	PDB	HUMAN:AF-Q8WZ42-F2	3 TITIN;
998	e8en-A	03:05:00	04:00:00	71	1400	7	PDB	HUMAN:AF-Q96RW7-F1	3 HEMICENTIN-1;
999	fewk-A	03:05:00	04:03:00	76	1400	11	PDB	HUMAN:AF-Q8NDA2-F1	4 HEMICENTIN-2;
1000	e1vl-A	03:05:00	03:04:00	72	1400	8	PDB	HUMAN:AF-Q5VST9-F1	9 OBSCURIN;
1001	e69y-A	03:05:00	04:03:00	79	1691	5	PDB	HUMAN:AF-P82987-F1	ADAMTS-LIKE PROTEIN 3;
1002	e53f-A	03:05:00	03:07:00	75	847	8	PDB	HUMAN:AF-Q8N475-F1	FOLLISTATIN-RELATED PROTEIN 5;
1003	e5tz-A	03:05:00	03:08:00	71	258	3	PDB	HUMAN:AF-P04440-F1	HLA CLASS II HISTOCOMPATIBILITY ANTIGEN, DP BETA
1004	e6vm-A	03:05:00	04:04:00	75	1400	8	PDB	HUMAN:AF-Q9NR99-F6	MATRIX-REMODELING-ASSOCIATED PROTEIN 5;
1005	e8xo-A	03:05:00	03:08:00	84	304	6	PDB	HUMAN:AF-Q14952-F1	KILLER CELL IMMUNOGLOBULIN-LIKE RECEPTOR 2DS3;
1006	e8qq-A	03:05:00	04:00:00	72	1400	6	PDB	HUMAN:AF-Q5VST9-F1	7 OBSCURIN;
1007	fbmx-A	03:05:00	04:03:00	79	1762	9	PDB	HUMAN:AF-Q8N6G6-F1	ADAMTS-LIKE PROTEIN 1;
1008	faur-A	03:05:00	04:02:00	74	1400	1	PDB	HUMAN:AF-Q8WZ42-F3	TITIN;
1009	e1wd-A	03:04:00	03:07:00	84	1416	7	PDB	HUMAN:AF-O75038-F1	1-PHOSPHATIDYLINOSITOL 4,5-BISPHOSPHATE PHOSPHODI
1010	ezhc-A	03:04:00	03:09:00	85	1302	9	PDB	HUMAN:AF-O14525-F1	ASTROTACTIN-1;
1011	e4se-A	03:04:00	04:05:00	87	390	15	PDB	HUMAN:AF-Q14654-F1	ATP-SENSITIVE INWARD RECTIFIER POTASSIUM CHANNEL
1012	e185-A	03:04:00	03:05:00	84	1234	2	PDB	HUMAN:AF-Q01970-F1	1-PHOSPHATIDYLINOSITOL 4,5-BISPHOSPHATE PHOSPHODI
1013	e8c8-A	03:04:00	04:05:00	87	1154	6	PDB	HUMAN:AF-Q8NEN9-F1	PDZ DOMAIN-CONTAINING PROTEIN 8;
1014	fehf-A	03:04:00	03:05:00	64	458	6	PDB	HUMAN:AF-P15169-F1	CARBOXYPEPTIDASE N CATALYTIC CHAIN;
1015	e3z1-A	03:04:00	05:00:00	68	652	3	PDB	HUMAN:AF-Q66K79-F1	CARBOXYPEPTIDASE Z;
1016	fdcg-A	03:04:00	04:00:00	88	896	8	PDB	HUMAN:AF-Q92539-F1	PHOSPHATIDATE PHOSPHATASE LPIN2;
1017	e7kq-A	03:04:00	03:04:00	78	302	12	PDB	HUMAN:AF-O75144-F1	ICOS LIGAND;
1018	e0ja-A	03:04:00	03:08:00	90	433	7	PDB	HUMAN:AF-B7U540-F1	INWARD RECTIFIER POTASSIUM CHANNEL 18;
1019	e3cw-A	03:04:00	03:05:00	75	506	5	PDB	HUMAN:AF-Q32M84-F1	BTB/POZ DOMAIN-CONTAINING PROTEIN 16;
1020	fgkh-A	03:04:00	03:06:00	66	756	5	PDB	HUMAN:AF-Q8N436-F1	INACTIVE CARBOXYPEPTIDASE-LIKE PROTEIN X2;
1021	fdfd-A	03:04:00	03:06:00	78	889	4	PDB	HUMAN:AF-Q6P5Z2-F1	SERINE/THREONINE-PROTEIN KINASE N3;
1022	e8ai-A	03:04:00	03:08:00	79	317	8	PDB	HUMAN:AF-Q9UQK1-F1	PROTEIN PHOSPHATASE 1 REGULATORY SUBUNIT 3C;
1023	e4dt-A	03:04:00	03:07:00	74	323	8	PDB	HUMAN:AF-Q08722-F1	LEUKOCYTE SURFACE ANTIGEN CD47;
1024	e4b7-A	03:04:00	04:01:00	73	826	5	PDB	HUMAN:AF-Q6P995-F1	PROTEIN FAM171B;
1025	e8wb-A	03:04:00	04:06:00	65	476	3	PDB	HUMAN:AF-P16870-F1	CARBOXYPEPTIDASE E;
1026	ffmt-A	03:04:00	04:06:00	71	1400	14	PDB	HUMAN:AF-Q5VST9-F3	OBSCURIN;
1027	fb47-A	03:04:00	03:03:00	82	1409	6	PDB	HUMAN:AF-Q63HR2-F1	TENSIN-2;
1028	e5i6-A	03:04:00	03:09:00	72	1093	4	PDB	HUMAN:AF-Q96JA1-F1	LEUCINE-RICH REPEATS AND IMMUNOGLOBULIN-LIKE DOMA
1029	fezi-A	03:04:00	04:08:00	75	1400	9	PDB	HUMAN:AF-Q15772-F5	STRIATED MUSCLE PREFERENTIALLY EXPRESSED PROTEIN
1030	e4an-A	03:04:00	04:00:00	71	1400	7	PDB	HUMAN:AF-Q5VST9-F5	OBSCURIN;
1031	e7tb-A	03:04:00	04:02:00	73	1400	7	PDB	HUMAN:AF-Q5VST9-F8	OBSCURIN;
1032	fcvg-A	03:04:00	03:05:00	77	1400	4	PDB	HUMAN:AF-P98160-F1	BASEMENT MEMBRANE-SPECIFIC HEPARAN SULFATE PROTEO
1033	ffci-A	03:04:00	04:00:00	82	215	6	PDB	HUMAN:AF-O60939-F1	SODIUM CHANNEL SUBUNIT BETA-2;
1034	e676-A	03:04:00	04:04:00	73	1400	8	PDB	HUMAN:AF-Q96RW7-F6	HEMICENTIN-1;
1035	e453-A	03:04:00	04:04:00	74	1896	12	PDB	HUMAN:AF-O75147-F1	OBSCURIN-LIKE PROTEIN 1;
1036	fcdz-A	03:04:00	03:09:00	74	1400	11	PDB	HUMAN:AF-O60229-F7	KALIRIN;
1037	e7ig-A	03:04:00	03:08:00	75	513	5	PDB	HUMAN:AF-Q50LG9-F1	LEUCINE-RICH REPEAT-CONTAINING PROTEIN 24;
1038	e5au-A	03:04:00	03:08:00	73	1400	8	PDB	HUMAN:AF-Q8WZ42-F1	27 TITIN;
1039	e2ug-A	03:04:00	03:09:00	70	298	6	PDB	HUMAN:AF-P57087-F1	JUNCTIONAL ADHESION MOLECULE B;
1040	feeo-A	03:04:00	03:08:00	73	943	12	PDB	HUMAN:AF-Q01974-F1	TYROSINE-PROTEIN KINASE TRANSMEMBRANE RECEPTOR RO
1041	fbjn-A	03:03:00	03:04:00	71	953	7	PDB	HUMAN:AF-Q6UXZ4-F1	NETRIN RECEPTOR UNC5D;
1042	favk-A	03:03:00	03:03:00	66	1400	2	PDB	HUMAN:AF-Q5VST9-F4	OBSCURIN;
1043	ffx9-A	03:03:00	03:09:00	87	424	7	PDB	HUMAN:AF-Q15842-F1	ATP-SENSITIVE INWARD RECTIFIER POTASSIUM CHANNEL
1044	ezno-A	03:03:00	03:08:00	69	661	10	PDB	HUMAN:AF-Q8NBH2-F1	KYPHOSCOLIOSIS PEPTIDASE;
1045	fd33-A	03:03:00	04:01:00	74	822	11	PDB	HUMAN:AF-P11362-F1	FIBROBLAST GROWTH FACTOR RECEPTOR 1;
1046	fboj-A	03:03:00	03:05:00	78	453	10	PDB	HUMAN:AF-Q01196-F1	RUNT-RELATED TRANSCRIPTION FACTOR 1;
1047	e2u7-A	03:03:00	03:01:00	74	1238	7	PDB	HUMAN:AF-Q9Y219-F1	PROTEIN JAGGED-2;
1048	e6db-A	03:03:00	04:01:00	94	445	4	PDB	HUMAN:AF-P48050-F1	INWARD RECTIFIER POTASSIUM CHANNEL 4;
1049	e0kd-A	03:03:00	03:07:00	66	734	6	PDB	HUMAN:AF-Q96SM3-F1	PROBABLE CARBOXYPEPTIDASE X1;
1050	fbf8-A	03:03:00	04:03:00	87	360	11	PDB	HUMAN:AF-O60928-F1	INWARD RECTIFIER POTASSIUM CHANNEL 13;
1051	ffv7-A	03:03:00	03:09:00	79	304	8	PDB	HUMAN:AF-Q96I82-F1	KAZAL-TYPE SERINE PROTEASE INHIBITOR DOMAIN-CONTA
1052	e3dj-A	03:03:00	03:09:00	86	1400	3	PDB	HUMAN:AF-Q96N23-F1	CILIA- AND FLAGELLA-ASSOCIATED PROTEIN 54;
1053	ffm1-A	03:03:00	04:03:00	77	1400	4	PDB	HUMAN:AF-O60229-F8	KALIRIN;
1054	e7ns-A	03:03:00	04:02:00	76	378	4	PDB	HUMAN:AF-Q96H15-F1	T-CELL IMMUNOGLOBULIN AND MUCIN DOMAIN-CONTAINING
1055	fcqz-A	03:03:00	04:02:00	88	1196	5	PDB	HUMAN:AF-Q8N157-F1	JOUBERIN;
1056	ezzx-A	03:03:00	03:09:00	75	592	11	PDB	HUMAN:AF-P0C6S8-F1	LEUCINE-RICH REPEAT AND IMMUNOGLOBULIN-LIKE DOMAI
1057	fbdm-A	03:03:00	04:09:00	73	366	4	PDB	HUMAN:AF-Q86YD3-F1	TRANSMEMBRANE PROTEIN 25;
1058	e8w0-A	03:03:00	03:06:00	78	2030	1	PDB	HUMAN:AF-Q8IZD9-F1	DEDICATOR OF CYTOKINESIS PROTEIN 3;
1059	e1zb-A	03:03:00	02:06:00	69	346	14	PDB	HUMAN:AF-P30511-F1	HLA CLASS I HISTOCOMPATIBILITY ANTIGEN, ALPHA CHA
1060	e0l4-A	03:03:00	04:08:00	82	553	11	PDB	HUMAN:AF-Q8IYJ1-F1	COPINE-9;
1061	e58s-A	03:03:00	03:09:00	79	1794	5	PDB	HUMAN:AF-A9Z1Z3-F1	FER-1-LIKE PROTEIN 4;
1062	ffvt-A	03:03:00	04:07:00	74	1400	5	PDB	HUMAN:AF-Q5VST9-F3	2 OBSCURIN;
1063	fd6i-A	03:03:00	04:01:00	71	1400	6	PDB	HUMAN:AF-Q96RW7-F9	HEMICENTIN-1;
1064	fc3h-A	03:03:00	04:01:00	74	1400	8	PDB	HUMAN:AF-Q8NDA2-F1	3 HEMICENTIN-2;
1065	e1k6-A	03:03:00	04:04:00	74	1400	5	PDB	HUMAN:AF-Q96RW7-F1	5 HEMICENTIN-1;
1066	fbab-A	03:03:00	03:05:00	72	1400	1	PDB	HUMAN:AF-P98160-F3	BASEMENT MEMBRANE-SPECIFIC HEPARAN SULFATE PROTEO
1067	e9yg-A	03:03:00	04:08:00	70	1400	3	PDB	HUMAN:AF-Q8NDA2-F2	HEMICENTIN-2;
1068	ezsi-A	03:02:00	03:05:00	83	1216	7	PDB	HUMAN:AF-Q9NQ66-F1	1-PHOSPHATIDYLINOSITOL 4,5-BISPHOSPHATE PHOSPHODI
1069	e5h7-A	03:02:00	03:02:00	79	925	8	PDB	HUMAN:AF-Q13469-F1	NUCLEAR FACTOR OF ACTIVATED T-CELLS, CYTOPLASMIC
1070	e48o-A	03:02:00	03:06:00	72	1400	7	PDB	HUMAN:AF-Q96JQ0-F2	PROTOCADHERIN-16;
1071	e4tx-A	03:02:00	03:08:00	82	653	10	PDB	HUMAN:AF-Q9BXF6-F1	RAB11 FAMILY-INTERACTING PROTEIN 5;
1072	e0ko-A	03:02:00	04:02:00	88	1349	9	PDB	HUMAN:AF-Q9BZ72-F1	MEMBRANE-ASSOCIATED PHOSPHATIDYLINOSITOL TRANSFER
1073	e7vj-A	03:02:00	04:03:00	90	419	4	PDB	HUMAN:AF-P48544-F1	G PROTEIN-ACTIVATED INWARD RECTIFIER POTASSIUM CH
1074	fbk9-A	03:02:00	03:09:00	79	415	10	PDB	HUMAN:AF-Q13761-F1	RUNT-RELATED TRANSCRIPTION FACTOR 3;
1075	e72o-A	03:02:00	03:04:00	83	1572	8	PDB	HUMAN:AF-Q9P2P5-F1	E3 UBIQUITIN-PROTEIN LIGASE HECW2;
1076	e14x-A	03:02:00	03:09:00	79	905	10	PDB	HUMAN:AF-Q9P2G4-F1	MICROTUBULE-ASSOCIATED PROTEIN 10;
1077	ezxp-A	03:02:00	03:06:00	72	123	7	PDB	HUMAN:AF-A0A0B4J1Y	8-F1 IMMUNOGLOBULIN LAMBDA VARIABLE 9-49;
1078	e5qp-A	03:02:00	03:08:00	68	493	6	PDB	HUMAN:AF-Q86WK6-F1	AMPHOTERIN-INDUCED PROTEIN 1;
1079	e2c3-A	03:02:00	04:00:00	85	1606	7	PDB	HUMAN:AF-Q76N89-F1	E3 UBIQUITIN-PROTEIN LIGASE HECW1;
1080	e87l-A	03:02:00	03:03:00	68	266	4	PDB	HUMAN:AF-P0DMS9-F1	TRANSMEMBRANE DOMAIN-CONTAINING PROTEIN TMIGD3;
1081	e9jh-A	03:02:00	03:02:00	65	1184	3	PDB	HUMAN:AF-O75339-F1	CARTILAGE INTERMEDIATE LAYER PROTEIN 1;
1082	ezpj-A	03:02:00	03:08:00	72	1065	3	PDB	HUMAN:AF-O94898-F1	LEUCINE-RICH REPEATS AND IMMUNOGLOBULIN-LIKE DOMA
1083	e21e-A	03:02:00	04:06:00	75	1400	9	PDB	HUMAN:AF-Q5VST9-F7	OBSCURIN;
1084	e2ci-A	03:02:00	03:07:00	83	348	6	PDB	HUMAN:AF-P43627-F1	KILLER CELL IMMUNOGLOBULIN-LIKE RECEPTOR 2DL2;
1085	e637-A	03:02:00	03:00:00	73	1356	4	PDB	HUMAN:AF-P35968-F1	VASCULAR ENDOTHELIAL GROWTH FACTOR RECEPTOR 2;
1086	fdxm-A	03:02:00	03:09:00	70	1400	10	PDB	HUMAN:AF-Q5VST9-F6	OBSCURIN;
1087	e02j-A	03:01:00	03:09:00	68	311	10	PDB	HUMAN:AF-Q86YW5-F1	TREM-LIKE TRANSCRIPT 1 PROTEIN;
1088	e7sp-A	03:01:00	03:09:00	89	1437	4	PDB	HUMAN:AF-Q6DHV5-F1	PROTEIN CC2D2B;
1089	e66t-A	03:01:00	04:05:00	70	112	4	PDB	HUMAN:AF-A0A0B4J23	4-F1 T CELL RECEPTOR ALPHA VARIABLE 2;
1090	e4cn-A	03:01:00	03:08:00	80	641	5	PDB	HUMAN:AF-Q9Y6Q1-F1	CALPAIN-6;
1091	fcy2-A	03:01:00	03:09:00	84	298	8	PDB	HUMAN:AF-Q9H6K1-F1	PROTEIN ILRUN;
1092	e1iq-A	03:01:00	03:06:00	76	903	8	PDB	HUMAN:AF-Q96J02-F1	E3 UBIQUITIN-PROTEIN LIGASE ITCHY HOMOLOG;
1093	fdon-A	03:01:00	04:00:00	93	423	5	PDB	HUMAN:AF-P48051-F1	G PROTEIN-ACTIVATED INWARD RECTIFIER POTASSIUM CH
1094	faq8-A	03:01:00	04:02:00	82	609	7	PDB	HUMAN:AF-Q8IZC4-F1	RHOTEKIN-2;
1095	e5b0-A	03:01:00	03:02:00	73	1400	8	PDB	HUMAN:AF-Q8WXG9-F1	3 ADHESION G-PROTEIN COUPLED RECEPTOR V1;
1096	fgvw-A	03:01:00	05:01:00	86	737	6	PDB	HUMAN:AF-Q02156-F1	PROTEIN KINASE C EPSILON TYPE;
1097	fdzi-A	03:01:00	03:03:00	74	147	5	PDB	HUMAN:AF-P02766-F1	TRANSTHYRETIN;
1098	e239-A	03:01:00	04:03:00	84	1265	10	PDB	HUMAN:AF-P16885-F1	1-PHOSPHATIDYLINOSITOL 4,5-BISPHOSPHATE PHOSPHODI
1099	e24k-A	03:01:00	04:02:00	87	986	6	PDB	HUMAN:AF-Q8N960-F1	CENTROSOMAL PROTEIN OF 120 KDA;
1100	e089-A	03:01:00	04:00:00	87	202	7	PDB	HUMAN:AF-Q9NVP2-F1	HISTONE CHAPERONE ASF1B;
1101	e0um-A	03:01:00	03:06:00	86	201	5	PDB	HUMAN:AF-P52566-F1	RHO GDP-DISSOCIATION INHIBITOR 2;
1102	e1km-A	03:01:00	03:08:00	83	789	5	PDB	HUMAN:AF-Q8N3E9-F1	1-PHOSPHATIDYLINOSITOL 4,5-BISPHOSPHATE PHOSPHODI
1103	fb49-A	03:01:00	03:08:00	80	1857	8	PDB	HUMAN:AF-Q2WGJ9-F1	FER-1-LIKE PROTEIN 6;
1104	e5ws-A	03:01:00	03:09:00	83	236	1	PDB	HUMAN:AF-Q8TAG5-F1	V-SET AND TRANSMEMBRANE DOMAIN-CONTAINING PROTEIN
1105	e3xl-A	03:01:00	03:07:00	72	1400	7	PDB	HUMAN:AF-Q8NDA2-F7	HEMICENTIN-2;
1106	fdtc-A	03:01:00	04:02:00	72	1400	7	PDB	HUMAN:AF-Q96RW7-F5	HEMICENTIN-1;
1107	e9ux-A	03:01:00	03:05:00	74	1400	7	PDB	HUMAN:AF-Q96RW7-F1	4 HEMICENTIN-1;
1108	e1lf-A	03:00:00	04:00:00	88	379	6	PDB	HUMAN:AF-P78508-F1	ATP-SENSITIVE INWARD RECTIFIER POTASSIUM CHANNEL
1109	e23a-A	03:00:00	04:00:00	70	620	1	PDB	HUMAN:AF-Q03252-F1	LAMIN-B2;
1110	ffes-A	03:00:00	03:02:00	80	902	13	PDB	HUMAN:AF-Q14934-F1	NUCLEAR FACTOR OF ACTIVATED T-CELLS, CYTOPLASMIC
1111	e5ai-A	03:00:00	04:01:00	86	436	14	PDB	HUMAN:AF-Q9UNX9-F1	ATP-SENSITIVE INWARD RECTIFIER POTASSIUM CHANNEL
1112	e6h1-A	03:00:00	04:00:00	86	1865	6	PDB	HUMAN:AF-Q14185-F1	DEDICATOR OF CYTOKINESIS PROTEIN 1;
1113	e1nj-A	03:00:00	03:06:00	81	1122	6	PDB	HUMAN:AF-Q16821-F1	PROTEIN PHOSPHATASE 1 REGULATORY SUBUNIT 3A;
1114	fcbj-A	03:00:00	04:03:00	78	551	6	PDB	HUMAN:AF-P56180-F1	PUTATIVE TYROSINE-PROTEIN PHOSPHATASE TPTE;
1115	fcvw-A	03:00:00	04:06:00	80	691	4	PDB	HUMAN:AF-Q9P1Z2-F1	CALCIUM-BINDING AND COILED-COIL DOMAIN-CONTAINING
1116	e9gw-A	03:00:00	03:08:00	73	120	8	PDB	HUMAN:AF-P01704-F1	IMMUNOGLOBULIN LAMBDA VARIABLE 2-14;
1117	e618-A	03:00:00	03:04:00	70	120	7	PDB	HUMAN:AF-A0A075B6I	1-F1 IMMUNOGLOBULIN LAMBDA VARIABLE 4-60;
1118	e9xf-A	03:00:00	03:08:00	74	207	3	PDB	HUMAN:AF-P07766-F1	T-CELL SURFACE GLYCOPROTEIN CD3 EPSILON CHAIN;
1119	e9ht-A	03:00:00	03:09:00	81	1735	2	PDB	HUMAN:AF-Q9HBL0-F1	TENSIN-1;
1120	e3r5-A	03:00:00	03:06:00	83	2099	6	PDB	HUMAN:AF-Q8NF50-F1	DEDICATOR OF CYTOKINESIS PROTEIN 8;
1121	fb82-A	03:00:00	03:07:00	76	235	7	PDB	HUMAN:AF-Q6UWV2-F1	MYELIN PROTEIN ZERO-LIKE PROTEIN 3;
1122	e39s-A	03:00:00	04:05:00	71	115	7	PDB	HUMAN:AF-A0A1B0GX6	8-F1 T CELL RECEPTOR BETA VARIABLE 2;
1123	fel0-A	03:00:00	04:00:00	80	1231	10	PDB	HUMAN:AF-Q8NDI1-F1	EH DOMAIN-BINDING PROTEIN 1;
1124	fft0-A	03:00:00	04:07:00	89	375	2	PDB	HUMAN:AF-Q99712-F1	ATP-SENSITIVE INWARD RECTIFIER POTASSIUM CHANNEL
1125	e1e5-A	03:00:00	03:06:00	62	652	10	PDB	HUMAN:AF-Q9NPY3-F1	COMPLEMENT COMPONENT C1Q RECEPTOR;
1126	e6d6-A	03:00:00	03:09:00	76	338	8	PDB	HUMAN:AF-Q6X784-F1	ZONA PELLUCIDA-BINDING PROTEIN 2;
1127	fdz0-A	03:00:00	03:05:00	85	1663	7	PDB	HUMAN:AF-P01024-F1	COMPLEMENT C3;
1128	e0q0-A	03:00:00	04:02:00	72	1400	4	PDB	HUMAN:AF-Q8NDA2-F8	HEMICENTIN-2;
1129	e89k-A	03:00:00	04:04:00	70	1400	7	PDB	HUMAN:AF-Q96RW7-F1	0 HEMICENTIN-1;
1130	fbx6-A	03:00:00	04:09:00	73	1400	5	PDB	HUMAN:AF-Q8NDA2-F1	2 HEMICENTIN-2;
1131	e6sl-A	03:00:00	03:09:00	80	2080	3	PDB	HUMAN:AF-O75923-F1	DYSFERLIN;
1132	e8lk-A	03:00:00	03:08:00	71	1400	6	PDB	HUMAN:AF-Q8NDA2-F1	5 HEMICENTIN-2;
1133	ffd2-A	02:09:00	04:01:00	69	111	7	PDB	HUMAN:AF-A0A5B7-F1	T CELL RECEPTOR BETA VARIABLE 29-1;
1134	fagu-A	02:09:00	05:03:00	82	756	6	PDB	HUMAN:AF-Q96JB6-F1	LYSYL OXIDASE HOMOLOG 4;
1135	e5em-A	02:09:00	04:03:00	68	121	9	PDB	HUMAN:AF-A0A075B6W	5-F1 T CELL RECEPTOR ALPHA VARIABLE 23/DELTA VARIAB
1136	e0jw-A	02:09:00	03:09:00	84	2302	4	PDB	HUMAN:AF-Q9P212-F1	1-PHOSPHATIDYLINOSITOL 4,5-BISPHOSPHATE PHOSPHODI
1137	e8l5-A	02:09:00	04:02:00	80	1400	4	PDB	HUMAN:AF-Q63HN8-F2	E3 UBIQUITIN-PROTEIN LIGASE RNF213;
1138	e6mf-A	02:09:00	03:05:00	82	1310	10	PDB	HUMAN:AF-Q9BYE9-F1	CADHERIN-RELATED FAMILY MEMBER 2;
1139	e3s6-A	02:09:00	04:04:00	78	288	8	PDB	HUMAN:AF-Q15116-F1	PROGRAMMED CELL DEATH PROTEIN 1;
1140	e3ut-A	02:09:00	04:07:00	79	2699	10	PDB	HUMAN:AF-Q9P273-F1	TENEURIN-3;
1141	fey1-A	02:09:00	03:04:00	79	204	9	PDB	HUMAN:AF-Q9UPM9-F1	B9 DOMAIN-CONTAINING PROTEIN 1;
1142	e6kl-A	02:09:00	04:09:00	79	1311	4	PDB	HUMAN:AF-O14976-F1	CYCLIN-G-ASSOCIATED KINASE;
1143	e6no-A	02:09:00	03:02:00	75	618	4	PDB	HUMAN:AF-Q9NYJ7-F1	DELTA-LIKE PROTEIN 3;
1144	e79s-A	02:09:00	02:09:00	65	708	6	PDB	HUMAN:AF-P46059-F1	SOLUTE CARRIER FAMILY 15 MEMBER 1;
1145	fg8g-A	02:09:00	03:09:00	83	393	8	PDB	HUMAN:AF-P04637-F1	CELLULAR TUMOR ANTIGEN P53;
1146	e6tx-A	02:09:00	03:03:00	65	1380	6	PDB	HUMAN:AF-O75976-F1	CARBOXYPEPTIDASE D;
1147	faco-A	02:09:00	03:09:00	78	1400	4	PDB	HUMAN:AF-Q14517-F1	3 PROTOCADHERIN FAT 1;
1148	fajs-A	02:09:00	04:00:00	84	636	2	PDB	HUMAN:AF-O15350-F1	TUMOR PROTEIN P73;
1149	e8ka-A	02:09:00	04:02:00	71	1400	6	PDB	HUMAN:AF-Q8WZ42-F3	7 TITIN;
1150	e73s-A	02:09:00	03:08:00	70	1400	6	PDB	HUMAN:AF-Q96RW7-F1	7 HEMICENTIN-1;
1151	e9bx-A	02:09:00	04:06:00	69	1400	6	PDB	HUMAN:AF-Q96RW7-F1	2 HEMICENTIN-1;
1152	fgzx-A	02:09:00	03:05:00	70	1400	9	PDB	HUMAN:AF-Q5VST9-F2	OBSCURIN;
1153	e88j-A	02:09:00	03:04:00	70	1400	10	PDB	HUMAN:AF-Q96RW7-F7	HEMICENTIN-1;
1154	fb0i-A	02:09:00	04:03:00	70	114	14	PDB	HUMAN:AF-A0A0B4J27	2-F1 T CELL RECEPTOR ALPHA VARIABLE 24;
1155	fd8d-A	02:08:00	03:03:00	81	214	10	PDB	HUMAN:AF-B9A064-F1	IMMUNOGLOBULIN LAMBDA-LIKE POLYPEPTIDE 5;
1156	e51b-A	02:08:00	04:03:00	68	110	7	PDB	HUMAN:AF-P0DPF4-F1	T CELL RECEPTOR ALPHA VARIABLE 35;
1157	fgxn-A	02:08:00	03:09:00	82	204	9	PDB	HUMAN:AF-Q9Y294-F1	HISTONE CHAPERONE ASF1A;
1158	e1xx-A	02:08:00	04:02:00	80	448	4	PDB	HUMAN:AF-O60806-F1	T-BOX TRANSCRIPTION FACTOR TBX19;
1159	fg4r-A	02:08:00	03:07:00	76	2047	5	PDB	HUMAN:AF-Q96HP0-F1	DEDICATOR OF CYTOKINESIS PROTEIN 6;
1160	e33g-A	02:08:00	03:05:00	72	1400	13	PDB	HUMAN:AF-Q6V1P9-F9	PROTOCADHERIN-23;
1161	e6fm-A	02:08:00	04:00:00	82	488	9	PDB	HUMAN:AF-Q9NWH7-F1	SPERMATOGENESIS-ASSOCIATED PROTEIN 6;
1162	ffok-A	02:08:00	03:06:00	78	435	12	PDB	HUMAN:AF-O15178-F1	T-BOX TRANSCRIPTION FACTOR T;
1163	e78n-A	02:08:00	04:01:00	76	2135	4	PDB	HUMAN:AF-O43157-F1	PLEXIN-B1;
1164	e64a-A	02:08:00	03:06:00	78	518	10	PDB	HUMAN:AF-Q99593-F1	T-BOX TRANSCRIPTION FACTOR TBX5;
1165	e3sq-A	02:08:00	04:04:00	72	937	7	PDB	HUMAN:AF-Q01973-F1	INACTIVE TYROSINE-PROTEIN KINASE TRANSMEMBRANE RE
1166	fgv5-A	02:08:00	04:02:00	67	1400	6	PDB	HUMAN:AF-Q96RW7-F1	1 HEMICENTIN-1;
1167	e1t6-A	02:08:00	04:04:00	70	1400	10	PDB	HUMAN:AF-Q8NDA2-F1	1 HEMICENTIN-2;
1168	e868-A	02:08:00	03:09:00	71	1400	8	PDB	HUMAN:AF-Q96RW7-F8	HEMICENTIN-1;
1169	e9aa-A	02:07:00	04:01:00	90	393	4	PDB	HUMAN:AF-Q92806-F1	G PROTEIN-ACTIVATED INWARD RECTIFIER POTASSIUM CH
1170	e68j-A	02:07:00	03:09:00	77	1400	9	PDB	HUMAN:AF-Q6V0I7-F3	PROTOCADHERIN FAT 4;
1171	fauu-A	02:07:00	03:07:00	71	999	7	PDB	HUMAN:AF-Q6DN14-F1	MULTIPLE C2 AND TRANSMEMBRANE DOMAIN-CONTAINING P
1172	fg17-A	02:07:00	04:00:00	69	123	6	PDB	HUMAN:AF-A8MZH6-F1	PUTATIVE OOCYTE-SECRETED PROTEIN 1 HOMOLOG;
1173	feb0-A	02:07:00	03:01:00	73	271	7	PDB	HUMAN:AF-P58417-F1	NEUREXOPHILIN-1;
1174	ffmy-A	02:07:00	03:06:00	81	1121	6	PDB	HUMAN:AF-Q5T0N1-F1	CILIA- AND FLAGELLA-ASSOCIATED PROTEIN 70;
1175	e12a-A	02:07:00	06:08:00	68	390	15	PDB	HUMAN:AF-O75900-F1	MATRIX METALLOPROTEINASE-23;
1176	e5s8-A	02:07:00	03:07:00	77	1400	8	PDB	HUMAN:AF-Q6V0I7-F6	PROTOCADHERIN FAT 4;
1177	e207-A	02:07:00	04:02:00	85	344	6	PDB	HUMAN:AF-Q9P0K9-F1	DOMON DOMAIN-CONTAINING PROTEIN FRRS1L;
1178	fe4r-A	02:07:00	03:09:00	77	1102	3	PDB	HUMAN:AF-Q93009-F1	UBIQUITIN CARBOXYL-TERMINAL HYDROLASE 7;
1179	ezii-A	02:07:00	03:09:00	84	680	2	PDB	HUMAN:AF-Q9H3D4-F1	TUMOR PROTEIN 63;
1180	e6rf-A	02:07:00	04:05:00	80	380	5	PDB	HUMAN:AF-Q96DV4-F1	39S RIBOSOMAL PROTEIN L38, MITOCHONDRIAL;
1181	e76l-A	02:07:00	03:03:00	74	264	7	PDB	HUMAN:AF-O95156-F1	NEUREXOPHILIN-2;
1182	e36q-A	02:07:00	03:09:00	74	1400	7	PDB	HUMAN:AF-O75962-F8	TRIPLE FUNCTIONAL DOMAIN PROTEIN;
1183	ff21-A	02:06:00	03:00:00	71	2521	11	PDB	HUMAN:AF-Q92508-F1	PIEZO-TYPE MECHANOSENSITIVE ION CHANNEL COMPONENT
1184	fgah-A	02:06:00	04:05:00	68	114	9	PDB	HUMAN:AF-A0A0B4J27	1-F1 T CELL RECEPTOR ALPHA VARIABLE 12-3;
1185	e8sr-A	02:06:00	04:01:00	77	242	13	PDB	HUMAN:AF-Q9NPA0-F1	ER MEMBRANE PROTEIN COMPLEX SUBUNIT 7;
1186	e10k-A	02:06:00	03:04:00	72	1082	8	PDB	HUMAN:AF-Q13367-F1	AP-3 COMPLEX SUBUNIT BETA-2;
1187	fbp6-A	02:06:00	03:06:00	72	360	8	PDB	HUMAN:AF-Q5T8I3-F1	PROTEIN FAM102B;
1188	fe8h-A	02:06:00	03:07:00	78	279	5	PDB	HUMAN:AF-P54709-F1	SODIUM/POTASSIUM-TRANSPORTING ATPASE SUBUNIT BETA
1189	e1j1-A	02:06:00	04:02:00	63	117	13	PDB	HUMAN:AF-P80748-F1	IMMUNOGLOBULIN LAMBDA VARIABLE 3-21;
1190	e0pm-A	02:06:00	03:02:00	83	852	7	PDB	HUMAN:AF-Q6ZN28-F1	METASTASIS-ASSOCIATED IN COLON CANCER PROTEIN 1;
1191	e4g1-A	02:06:00	04:02:00	78	151	6	PDB	HUMAN:AF-P61916-F1	NPC INTRACELLULAR CHOLESTEROL TRANSPORTER 2;
1192	feur-A	02:06:00	03:08:00	81	1094	6	PDB	HUMAN:AF-P53992-F1	PROTEIN TRANSPORT PROTEIN SEC24C;
1193	e4cu-A	02:06:00	03:09:00	62	244	8	PDB	HUMAN:AF-Q5SZD1-F1	UNCHARACTERIZED PROTEIN C6ORF141;
1194	e8fx-A	02:06:00	03:01:00	61	125	11	PDB	HUMAN:AF-P01824-F1	IMMUNOGLOBULIN HEAVY VARIABLE 4-39;
1195	e6g5-A	02:06:00	03:02:00	82	807	2	PDB	HUMAN:AF-Q9HCB6-F1	SPONDIN-1;
1196	fe40-A	02:06:00	03:09:00	85	799	4	PDB	HUMAN:AF-Q6ZSY5-F1	PROTEIN PHOSPHATASE 1 REGULATORY SUBUNIT 3F;
1197	fahn-A	02:06:00	04:02:00	75	964	3	PDB	HUMAN:AF-O94972-F1	E3 UBIQUITIN-PROTEIN LIGASE TRIM37;
1198	fcvs-A	02:06:00	02:09:00	64	1287	14	PDB	HUMAN:AF-Q15468-F1	SCL-INTERRUPTING LOCUS PROTEIN;
1199	e486-A	02:06:00	03:04:00	76	1044	3	PDB	HUMAN:AF-O00329-F1	PHOSPHATIDYLINOSITOL 4,5-BISPHOSPHATE 3-KINASE CA
1200	fe6j-A	02:06:00	03:03:00	71	184	6	PDB	HUMAN:AF-A0A2R8YFL	7-F1 OOCYTE-SECRETED PROTEIN 4A;
1201	e976-A	02:05:00	03:09:00	72	276	10	PDB	HUMAN:AF-O95944-F1	NATURAL CYTOTOXICITY TRIGGERING RECEPTOR 2;
1202	fff5-A	02:05:00	03:07:00	81	910	1	PDB	HUMAN:AF-Q96LU7-F1	MYELIN REGULATORY FACTOR-LIKE PROTEIN;
1203	e2oc-A	02:05:00	04:08:00	82	574	4	PDB	HUMAN:AF-Q08397-F1	LYSYL OXIDASE HOMOLOG 1;
1204	e4ld-A	02:05:00	05:01:00	88	732	3	PDB	HUMAN:AF-O15259-F1	NEPHROCYSTIN-1;
1205	fdhp-A	02:05:00	04:04:00	71	522	7	PDB	HUMAN:AF-Q86SJ2-F1	AMPHOTERIN-INDUCED PROTEIN 2;
1206	e1rx-A	02:05:00	03:04:00	48	1400	10	PDB	HUMAN:AF-Q96PZ7-F7	CUB AND SUSHI DOMAIN-CONTAINING PROTEIN 1;
1207	ffhs-A	02:05:00	03:02:00	77	331	4	PDB	HUMAN:AF-Q9BUD6-F1	SPONDIN-2;
1208	e1tp-A	02:05:00	03:03:00	67	1400	7	PDB	HUMAN:AF-Q96JQ0-F9	PROTOCADHERIN-16;
1209	fagz-A	02:05:00	04:07:00	77	403	8	PDB	HUMAN:AF-P60484-F1	PHOSPHATIDYLINOSITOL 3,4,5-TRISPHOSPHATE 3-PHOSPH
1210	fcmc-A	02:05:00	03:05:00	79	1167	6	PDB	HUMAN:AF-O75578-F1	INTEGRIN ALPHA-10;
1211	fgsk-A	02:05:00	02:09:00	65	389	3	PDB	HUMAN:AF-Q7Z6J8-F1	E3 UBIQUITIN-PROTEIN LIGASE E3D;
1212	fcm5-A	02:05:00	03:04:00	79	559	11	PDB	HUMAN:AF-Q9NXB0-F1	MECKEL SYNDROME TYPE 1 PROTEIN;
1213	fde4-A	02:05:00	04:00:00	66	1361	14	PDB	HUMAN:AF-Q8WUJ3-F1	CELL MIGRATION-INDUCING AND HYALURONAN-BINDING PR
1214	e3z0-A	02:05:00	04:00:00	72	1400	8	PDB	HUMAN:AF-Q4G0P3-F1	9 HYDROCEPHALUS-INDUCING PROTEIN HOMOLOG;
1215	e4x3-A	02:05:00	04:04:00	70	443	6	PDB	HUMAN:AF-P14384-F1	CARBOXYPEPTIDASE M;
1216	e925-A	02:05:00	03:04:00	71	329	6	PDB	HUMAN:AF-Q96PL2-F1	BETA-TECTORIN;
1217	e9a0-A	02:05:00	03:08:00	66	301	3	PDB	HUMAN:AF-Q8TDQ0-F1	HEPATITIS A VIRUS CELLULAR RECEPTOR 2;
1218	e8kh-A	02:05:00	04:04:00	74	701	4	PDB	HUMAN:AF-O75342-F1	ARACHIDONATE 12-LIPOXYGENASE, 12R-TYPE;
1219	fd7q-A	02:05:00	04:03:00	83	1955	6	PDB	HUMAN:AF-Q96QU1-F1	PROTOCADHERIN-15;
1220	e83u-A	02:05:00	03:09:00	75	1400	9	PDB	HUMAN:AF-Q9Y6V0-F1	8 PROTEIN PICCOLO;
1221	fg4a-A	02:05:00	04:01:00	74	120	8	PDB	HUMAN:AF-A0A0A0MRZ	7-F1 IMMUNOGLOBULIN KAPPA VARIABLE 2D-26;
1222	e0l5-A	02:04:00	03:01:00	84	302	4	PDB	HUMAN:AF-P49184-F1	DEOXYRIBONUCLEASE-1-LIKE 1;
1223	e94b-A	02:04:00	03:00:00	72	175	7	PDB	HUMAN:AF-Q9BPU9-F1	B9 DOMAIN-CONTAINING PROTEIN 2;
1224	e8yd-A	02:04:00	04:06:00	87	502	6	PDB	HUMAN:AF-Q12800-F1	ALPHA-GLOBIN TRANSCRIPTION FACTOR CP2;
1225	e10s-A	02:04:00	04:04:00	76	160	11	PDB	HUMAN:AF-A0A2R8Y4Y	8-F1 OOCYTE-SECRETED PROTEIN 4B;
1226	fa1z-A	02:04:00	03:08:00	79	290	3	PDB	HUMAN:AF-P14415-F1	SODIUM/POTASSIUM-TRANSPORTING ATPASE SUBUNIT BETA
1227	e5lw-A	02:04:00	03:05:00	68	660	10	PDB	HUMAN:AF-Q8WZA1-F1	PROTEIN O-LINKED-MANNOSE
1228	fetk-A	02:04:00	03:04:00	80	357	4	PDB	HUMAN:AF-Q9UN42-F1	PROTEIN ATP1B4;
1229	e795-A	02:04:00	03:05:00	71	384	7	PDB	HUMAN:AF-Q5T9C2-F1	PROTEIN FAM102A;
1230	e87u-A	02:04:00	03:07:00	68	118	9	PDB	HUMAN:AF-A0A075B6I	6-F1 PROBABLE NON-FUNCTIONAL IMMUNOGLOBULIN LAMBDA
1231	fdxi-A	02:04:00	04:00:00	85	1870	6	PDB	HUMAN:AF-Q9H7D0-F1	DEDICATOR OF CYTOKINESIS PROTEIN 5;
1232	e7q6-A	02:04:00	04:08:00	74	967	11	PDB	HUMAN:AF-B7ZC32-F1	KINESIN-LIKE PROTEIN KIF28P;
1233	e4ej-A	02:04:00	03:03:00	69	1400	4	PDB	HUMAN:AF-Q6N022-F3	TENEURIN-4;
1234	e37a-A	02:04:00	04:08:00	69	114	6	PDB	HUMAN:AF-A0A087X0K	7-F1 PROBABLE NON-FUNCTIONAL T CELL RECEPTOR BETA V
1235	fcps-A	02:04:00	03:09:00	85	240	7	PDB	HUMAN:AF-P08294-F1	EXTRACELLULAR SUPEROXIDE DISMUTASE ;
1236	fgss-A	02:04:00	03:05:00	77	1070	5	PDB	HUMAN:AF-P42338-F1	PHOSPHATIDYLINOSITOL 4,5-BISPHOSPHATE 3-KINASE CA
1237	faxv-A	02:04:00	03:08:00	77	1290	14	PDB	HUMAN:AF-P19174-F1	1-PHOSPHATIDYLINOSITOL 4,5-BISPHOSPHATE PHOSPHODI
1238	feh0-A	02:04:00	04:08:00	71	1400	7	PDB	HUMAN:AF-Q8WZ42-F1	2 TITIN;
1239	e65h-A	02:03:00	03:01:00	58	153	9	PDB	HUMAN:AF-B7Z8K6-F1	T CELL RECEPTOR DELTA CONSTANT;
1240	e8uc-A	02:03:00	03:05:00	64	521	3	PDB	HUMAN:AF-Q7L1T6-F1	CYTOCHROME B5 REDUCTASE 4;
1241	febz-A	02:03:00	02:06:00	54	2353	9	PDB	HUMAN:AF-Q4AC94-F1	C2 DOMAIN-CONTAINING PROTEIN 3;
1242	e2pd-A	02:03:00	04:01:00	71	205	7	PDB	HUMAN:AF-P20827-F1	EPHRIN-A1;
1243	e6kc-A	02:03:00	04:03:00	73	855	3	PDB	HUMAN:AF-Q5K4E3-F1	POLYSERASE-2;
1244	fe6z-A	02:03:00	04:02:00	74	711	3	PDB	HUMAN:AF-Q9BYJ1-F1	HYDROPEROXIDE ISOMERASE ALOXE3;
1245	fawa-A	02:03:00	03:07:00	90	283	4	PDB	HUMAN:AF-Q5JUQ0-F1	PROTEIN FAM78A;
1246	e721-A	02:03:00	04:03:00	50	1459	2	PDB	HUMAN:AF-O95490-F1	ADHESION G PROTEIN-COUPLED RECEPTOR L2;
1247	e5g5-A	02:03:00	03:02:00	71	1400	4	PDB	HUMAN:AF-Q96RL7-F9	VACUOLAR PROTEIN SORTING-ASSOCIATED PROTEIN 13A;
1248	ezft-A	02:03:00	03:03:00	81	743	7	PDB	HUMAN:AF-O15119-F1	T-BOX TRANSCRIPTION FACTOR TBX3;
1249	e0h0-A	02:03:00	03:04:00	49	1400	6	PDB	HUMAN:AF-Q7Z408-F1	CUB AND SUSHI DOMAIN-CONTAINING PROTEIN 2;
1250	e84o-A	02:03:00	04:00:00	79	1523	6	PDB	HUMAN:AF-Q8N3D4-F1	EH DOMAIN-BINDING PROTEIN 1-LIKE PROTEIN 1;
1251	ezkz-A	02:03:00	03:07:00	51	1400	6	PDB	HUMAN:AF-Q7Z407-F4	CUB AND SUSHI DOMAIN-CONTAINING PROTEIN 3;
1252	e2ya-A	02:03:00	04:01:00	72	1258	3	PDB	HUMAN:AF-O15357-F1	PHOSPHATIDYLINOSITOL 3,4,5-TRISPHOSPHATE 5-PHOSPH
1253	ez1x-A	02:03:00	04:03:00	71	120	7	PDB	HUMAN:AF-P06310-F1	IMMUNOGLOBULIN KAPPA VARIABLE 2-30;
1254	ez5s-A	02:03:00	04:02:00	71	120	7	PDB	HUMAN:AF-A0A075B6S	6-F1 IMMUNOGLOBULIN KAPPA VARIABLE 2D-30;
1255	feux-A	02:02:00	02:08:00	57	910	16	PDB	HUMAN:AF-Q9HB75-F1	P53-INDUCED DEATH DOMAIN-CONTAINING PROTEIN 1;
1256	ezr5-A	02:02:00	02:04:00	58	1163	10	PDB	HUMAN:AF-P20702-F1	INTEGRIN ALPHA-X;
1257	e42q-A	02:02:00	03:04:00	77	634	6	PDB	HUMAN:AF-Q8IXW0-F1	LAMIN TAIL DOMAIN-CONTAINING PROTEIN 2;
1258	fcsh-A	02:02:00	04:03:00	81	1271	10	PDB	HUMAN:AF-P11274-F1	BREAKPOINT CLUSTER REGION PROTEIN;
1259	e0gx-A	02:02:00	03:06:00	54	1400	7	PDB	HUMAN:AF-O43149-F8	ZINC FINGER ZZ-TYPE AND EF-HAND DOMAIN-CONTAINING
1260	e8az-A	02:02:00	02:05:00	50	1179	12	PDB	HUMAN:AF-P38570-F1	INTEGRIN ALPHA-E;
1261	e3w2-A	02:02:00	04:04:00	58	585	14	PDB	HUMAN:AF-Q9BY44-F1	EUKARYOTIC TRANSLATION INITIATION FACTOR 2A;
1262	e7we-A	02:02:00	02:07:00	61	330	8	PDB	HUMAN:AF-Q9NU53-F1	GLYCOPROTEIN INTEGRAL MEMBRANE PROTEIN 1;
1263	e13l-A	02:02:00	03:08:00	62	1400	8	PDB	HUMAN:AF-O95714-F1	3 E3 UBIQUITIN-PROTEIN LIGASE HERC2;
1264	e72n-A	02:02:00	03:06:00	71	1068	4	PDB	HUMAN:AF-P42336-F1	PHOSPHATIDYLINOSITOL 4,5-BISPHOSPHATE 3-KINASE CA
1265	e8gd-A	02:02:00	03:08:00	72	409	7	PDB	HUMAN:AF-Q9ULG3-F1	UNCHARACTERIZED PROTEIN CFAP92;
1266	ez9y-A	02:02:00	04:04:00	64	114	6	PDB	HUMAN:AF-A0A0B4J1U	6-F1 T CELL RECEPTOR BETA VARIABLE 9;
1267	e2i0-A	02:02:00	03:04:00	77	699	6	PDB	HUMAN:AF-Q9P2Y5-F1	UV RADIATION RESISTANCE-ASSOCIATED GENE PROTEIN;
1268	fcvt-A	02:01:00	03:01:00	59	365	7	PDB	HUMAN:AF-Q9Y2Z0-F1	PROTEIN SGT1 HOMOLOG;
1269	fb0z-A	02:01:00	04:05:00	67	1400	9	PDB	HUMAN:AF-Q8TDW7-F1	PROTOCADHERIN FAT 3;
1270	ezfs-A	02:01:00	04:01:00	65	272	9	PDB	HUMAN:AF-Q8N5I3-F1	POTASSIUM CHANNEL REGULATORY PROTEIN;
1271	fch7-A	02:01:00	03:07:00	75	712	7	PDB	HUMAN:AF-Q13207-F1	T-BOX TRANSCRIPTION FACTOR TBX2;
1272	fcyv-A	02:01:00	04:02:00	63	1400	8	PDB	HUMAN:AF-Q14517-F1	PROTOCADHERIN FAT 1;
1273	e7pv-A	02:01:00	03:01:00	73	723	4	PDB	HUMAN:AF-O00548-F1	DELTA-LIKE PROTEIN 1;
1274	e85b-A	02:01:00	03:06:00	67	631	12	PDB	HUMAN:AF-P04844-F1	DOLICHYL-DIPHOSPHOOLIGOSACCHARIDE--PROTEIN
1275	fdjq-A	02:01:00	03:08:00	84	447	13	PDB	HUMAN:AF-Q15562-F1	TRANSCRIPTIONAL ENHANCER FACTOR TEF-4;
1276	fedj-A	02:01:00	04:06:00	62	362	2	PDB	HUMAN:AF-Q9P035-F1	VERY-LONG-CHAIN (3R)-3-HYDROXYACYL-COA DEHYDRATAS
1277	e30h-A	02:01:00	03:03:00	78	435	4	PDB	HUMAN:AF-Q99594-F1	TRANSCRIPTIONAL ENHANCER FACTOR TEF-5;
1278	ffve-A	02:01:00	03:04:00	62	205	13	PDB	HUMAN:AF-P04792-F1	HEAT SHOCK PROTEIN BETA-1;
1279	fcsj-A	02:01:00	03:04:00	72	1189	1	PDB	HUMAN:AF-Q92835-F1	PHOSPHATIDYLINOSITOL 3,4,5-TRISPHOSPHATE 5-PHOSPH
1280	e498-A	02:01:00	04:03:00	78	753	6	PDB	HUMAN:AF-P58215-F1	LYSYL OXIDASE HOMOLOG 3;
1281	e7l6-A	02:01:00	04:06:00	85	623	5	PDB	HUMAN:AF-Q53TS8-F1	C2 CALCIUM-DEPENDENT DOMAIN-CONTAINING PROTEIN 6;
1282	fd5j-A	02:01:00	03:04:00	49	994	6	PDB	HUMAN:AF-Q53EL9-F1	SEIZURE PROTEIN 6 HOMOLOG;
1283	e3kz-A	02:01:00	03:01:00	66	771	6	PDB	HUMAN:AF-Q9HCN3-F1	POST-GPI ATTACHMENT TO PROTEINS FACTOR 6;
1284	e29b-A	02:00:00	04:06:00	80	363	14	PDB	HUMAN:AF-O75818-F1	RIBONUCLEASE P PROTEIN SUBUNIT P40;
1285	fbd0-A	02:00:00	03:09:00	84	659	4	PDB	HUMAN:AF-Q8TAP6-F1	CENTROSOMAL PROTEIN OF 76 KDA;
1286	e7v0-A	02:00:00	03:05:00	62	398	3	PDB	HUMAN:AF-Q96G97-F1	SEIPIN;
1287	e9ok-A	02:00:00	03:07:00	52	1400	13	PDB	HUMAN:AF-Q7Z408-F5	CUB AND SUSHI DOMAIN-CONTAINING PROTEIN 2;
1288	fbl6-A	02:00:00	02:09:00	74	418	18	PDB	HUMAN:AF-P53677-F1	AP-3 COMPLEX SUBUNIT MU-2;
1289	ffa4-A	02:00:00	04:00:00	72	1400	8	PDB	HUMAN:AF-O75592-F5	E3 UBIQUITIN-PROTEIN LIGASE MYCBP2;
1290	fdpu-A	02:00:00	03:00:00	56	1181	13	PDB	HUMAN:AF-P17301-F1	INTEGRIN ALPHA-2;
1291	fetg-A	02:00:00	03:05:00	78	569	4	PDB	HUMAN:AF-Q7L9B9-F1	ENDONUCLEASE/EXONUCLEASE/PHOSPHATASE FAMILY DOMAI
1292	e0fz-A	02:00:00	03:06:00	70	769	9	PDB	HUMAN:AF-P26012-F1	INTEGRIN BETA-8;
1293	fbb1-A	02:00:00	03:08:00	73	392	8	PDB	HUMAN:AF-Q6IQ16-F1	SPECKLE-TYPE POZ PROTEIN-LIKE;
