# Supplementary material for: Computational and Functional Analysis of Structural Features in the ZAKα Kinase
Source: Cells. 2023 Mar 22;12(6):969. doi: 10.3390/cells12060969 (PMC10047201; doi:10.3390/cells12060969)
Supplement: Supplementary file 1 [file cells-12-00969-s001.zip › Table S2.xlsx]

## Sheet: Table S2
Github code: https://github.com/Valdemar-BI-Johansen/MAP3K20_PAE.git								JSON file: https://alphafold.ebi.ac.uk/
Residue NO	Residue NO
	0	1	3	5	7	9	12	15	20	20	23	25	26	28	25	27	29	29	29	29	30	29	29	29	28	27	27	28	29	27	29	29	29	29	26	28	28	28	28	28	29	25	28	26	28	28	26	26	23
	2	0	1	3	6	8	11	13	18	19	22	24	25	27	24	24	28	28	28	28	28	28	28	28	27	25	25	26	27	25	28	28	27	28	25	27	27	27	26	27	27	25	26	25	25	26	24	25	22
	3	2	0	1	3	6	8	12	14	16	19	21	24	26	22	24	27	27	28	28	28	28	28	27	26	26	24	26	27	25	27	28	26	27	23	26	25	24	25	26	26	24	25	24	24	25	22	24	20
	5	4	2	0	1	4	6	8	12	14	17	19	23	23	21	23	25	25	25	26	27	25	26	26	25	23	22	24	25	23	25	25	25	25	22	24	22	23	23	24	25	22	23	22	22	24	20	23	19
	7	6	5	2	0	1	4	6	9	12	14	17	21	22	19	20	23	23	23	25	25	24	25	25	25	23	22	23	25	21	24	24	22	22	18	22	20	20	22	21	23	18	21	19	20	22	20	23	20
	9	9	7	4	2	0	1	3	7	8	12	14	16	16	15	16	18	19	20	22	21	19	21	19	21	20	22	20	19	17	18	19	18	18	15	18	14	16	19	17	20	14	18	14	19	19	17	20	18
	11	9	9	6	4	2	0	1	4	6	8	12	12	14	11	11	15	15	16	17	16	15	17	15	17	16	16	16	17	13	16	15	13	14	9	14	11	11	16	12	15	10	14	11	14	14	12	15	14
	13	10	9	8	6	4	1	0	1	3	4	5	8	7	6	7	10	10	11	12	11	10	10	10	11	11	11	10	11	9	10	12	10	9	6	7	5	6	7	7	10	8	10	8	10	9	9	11	9
	15	12	10	8	6	5	2	1	0	1	1	2	2	2	2	2	4	3	5	5	5	5	5	6	7	7	6	4	5	3	4	4	3	4	3	3	3	3	4	4	4	3	3	3	3	3	3	4	4
	16	12	10	8	6	6	3	2	1	0	1	1	1	2	1	2	2	2	3	3	3	4	4	4	5	5	4	3	3	2	2	2	2	2	2	2	2	2	3	2	2	2	2	2	2	2	3	3	3
	15	13	10	8	6	5	3	2	1	1	0	1	1	1	1	1	1	1	2	2	2	3	3	3	4	5	4	3	2	2	2	2	1	1	1	1	1	2	2	2	2	1	2	1	2	2	2	2	3
	16	12	11	9	6	5	3	2	1	1	1	0	1	1	1	1	1	2	2	2	2	3	3	4	4	5	4	3	2	2	2	2	1	2	1	1	1	2	2	2	2	2	2	2	2	2	2	2	3
	17	13	11	10	6	5	4	2	2	1	1	1	0	1	1	1	1	1	2	2	2	3	3	3	5	5	4	3	2	2	2	2	1	1	1	1	1	2	2	2	2	2	2	1	2	2	2	3	3
	18	14	12	12	8	6	4	3	2	2	1	1	1	0	1	1	1	2	2	3	3	3	4	4	5	5	5	3	3	3	2	2	2	1	1	1	1	2	2	2	2	2	2	2	2	2	2	3	3
	18	15	12	11	7	5	4	2	2	1	1	1	1	1	0	1	1	1	1	2	2	3	3	4	5	5	4	3	2	2	2	1	1	1	1	1	1	1	1	1	1	1	1	1	2	2	2	3	3
	18	15	11	10	7	5	4	2	2	1	1	1	1	1	1	0	1	1	1	2	2	2	3	3	4	4	4	3	2	2	1	1	1	1	1	1	1	1	1	1	1	1	1	1	2	2	2	2	3
	16	13	10	10	7	5	4	3	2	2	1	1	1	1	1	1	0	1	1	2	2	2	3	3	4	4	4	3	2	2	1	1	1	1	1	1	1	1	1	1	1	1	1	1	2	2	2	3	3
	17	14	12	11	8	6	4	3	2	2	2	2	1	1	1	1	1	0	1	1	2	2	2	3	5	4	4	3	2	1	1	1	1	1	1	1	2	2	2	2	1	1	1	1	2	2	2	3	3
	16	13	10	10	8	6	5	4	4	3	2	2	2	2	2	2	1	1	0	2	2	3	3	4	5	5	5	3	3	2	2	1	1	1	2	2	2	2	2	2	2	2	2	2	2	3	3	4	4
	17	15	13	12	10	9	8	7	8	8	8	7	6	5	7	5	3	2	1	0	1	2	3	4	5	5	6	4	3	2	2	1	3	3	5	4	6	5	4	5	4	5	4	3	3	4	5	6	7
	20	16	15	13	11	10	8	7	8	6	6	6	5	5	6	5	4	2	2	1	0	1	2	3	4	5	4	4	3	1	1	2	3	4	5	6	7	6	6	5	4	4	3	3	3	3	4	4	5
	19	17	15	14	13	12	12	9	10	10	9	8	7	8	9	6	5	4	4	3	1	0	1	3	4	7	6	5	3	3	1	4	6	7	7	10	10	10	10	7	7	7	5	4	7	5	7	7	8
	21	19	18	16	17	14	14	12	14	13	13	13	9	11	11	10	10	7	6	4	3	1	0	2	4	5	5	5	6	4	4	4	6	10	11	10	13	12	11	11	7	8	8	6	7	6	7	8	10
	23	22	20	20	21	19	20	18	19	20	18	19	13	18	18	13	15	12	10	8	6	4	2	0	1	3	6	6	6	5	6	8	13	14	17	16	21	18	18	16	12	11	12	8	9	7	9	10	12
	23	22	20	20	21	19	19	20	20	20	19	18	16	18	17	13	15	10	11	8	7	5	3	2	0	2	3	4	4	5	7	9	11	14	18	16	18	19	17	18	13	12	10	8	7	7	8	9	10
	22	21	19	19	18	16	16	15	15	16	15	17	16	18	17	14	14	12	10	10	8	7	5	3	1	0	1	2	5	5	8	10	11	14	16	15	15	16	15	16	15	11	11	9	8	7	7	10	10
	21	21	19	18	17	16	15	14	13	12	12	15	12	15	15	10	13	10	10	10	7	8	6	5	3	1	0	1	4	7	8	11	9	13	13	14	16	15	15	13	14	10	11	7	5	5	6	9	11
	20	18	16	16	14	12	13	11	12	12	10	11	9	11	11	8	7	6	6	6	4	4	4	5	4	2	1	0	1	3	4	5	8	8	9	9	12	11	9	8	8	7	5	4	3	4	4	5	7
	19	15	13	13	10	9	7	5	5	6	5	5	5	5	4	4	4	4	3	3	2	2	3	4	3	3	3	1	0	1	2	3	3	4	4	5	6	5	5	4	3	3	2	2	2	2	3	3	4
	18	15	12	11	8	6	5	3	3	3	2	2	2	3	2	2	2	1	2	2	2	2	2	3	3	3	3	1	1	0	1	1	1	2	2	2	3	3	2	2	2	1	1	1	1	1	2	2	3
	17	14	12	12	8	6	4	3	2	2	2	2	2	2	2	1	1	1	1	1	1	2	2	3	3	3	3	1	1	1	0	1	1	1	1	2	2	2	2	2	1	1	1	1	1	1	2	2	3
	16	12	10	9	6	5	4	3	2	2	2	2	2	2	1	1	1	1	2	1	1	2	2	3	4	4	3	2	1	1	1	0	1	1	1	1	1	2	1	1	1	1	1	1	1	2	2	2	3
	17	14	12	11	8	5	4	3	2	2	1	1	1	1	1	1	1	1	1	2	2	2	2	3	4	4	3	2	2	1	1	1	0	1	1	1	1	1	1	1	1	1	1	1	1	2	2	3	3
	16	13	11	10	7	5	4	2	2	2	1	1	1	1	1	1	1	1	1	2	2	2	2	3	4	4	3	2	2	1	1	1	1	0	1	1	1	1	1	1	1	1	1	1	1	2	2	3	3
	16	14	11	10	7	5	3	2	2	1	1	1	1	1	1	1	1	1	1	2	2	2	2	3	4	4	3	2	2	1	1	1	1	1	0	1	1	1	1	1	1	1	1	1	2	2	2	2	3
	16	13	11	11	7	6	4	3	2	2	1	1	1	1	1	1	1	1	1	2	2	2	3	4	4	5	4	3	2	2	1	1	1	1	1	0	1	1	1	1	1	1	1	1	2	2	2	3	3
	17	14	11	12	8	6	4	3	2	2	2	1	2	1	1	1	1	2	2	2	3	3	4	4	5	5	5	4	3	2	2	2	1	1	1	1	0	1	1	1	2	2	2	2	3	2	3	4	4
	17	15	12	11	8	6	4	3	2	2	2	2	2	2	1	1	1	2	2	3	3	3	4	5	6	6	5	4	4	2	2	2	2	1	1	1	1	0	1	1	1	2	2	2	2	3	3	4	4
	15	13	11	10	8	7	5	4	3	2	3	2	2	2	1	2	2	2	2	3	3	3	4	4	6	6	5	4	3	2	2	2	1	1	1	1	1	1	0	1	1	1	2	2	3	3	4	5	5
	18	15	12	11	9	6	5	3	3	3	2	2	2	2	2	2	1	2	2	2	2	2	3	4	5	5	4	3	3	2	2	1	1	1	1	1	1	1	1	0	1	1	1	2	2	3	3	4	4
	16	13	11	10	7	6	4	3	2	2	2	2	2	2	2	1	1	1	1	2	2	2	3	3	4	4	4	2	2	2	1	1	1	1	1	1	1	1	1	1	0	1	1	1	1	2	2	3	3
	17	13	11	9	6	6	3	3	2	2	1	2	1	2	1	1	1	1	1	2	2	2	2	3	4	3	3	2	2	1	1	1	1	1	1	1	1	1	1	1	1	0	1	1	1	1	2	2	3
	18	15	12	10	7	5	3	2	2	2	1	2	1	2	1	1	1	1	1	2	2	2	3	3	4	4	3	2	1	1	1	1	1	1	1	1	2	2	1	1	1	1	0	1	1	1	1	2	2
	17	14	11	10	6	6	3	2	2	2	1	2	1	2	1	1	1	1	1	2	2	2	2	3	4	3	3	2	1	1	1	1	1	1	1	2	2	2	2	1	1	1	1	0	1	1	1	2	2
	18	15	12	9	7	6	4	3	2	2	2	2	2	2	2	2	2	1	2	2	2	3	3	4	5	4	3	2	1	1	1	1	1	2	2	2	2	2	2	2	2	1	1	1	0	1	1	2	2
	18	15	12	11	8	7	4	3	3	3	3	3	2	3	3	2	3	2	3	3	3	3	3	4	5	5	4	3	2	1	2	2	2	3	3	3	4	3	3	3	2	2	1	1	1	0	1	1	2
	19	16	14	13	11	9	7	6	4	4	4	4	3	5	4	4	3	3	3	3	4	4	4	5	6	5	4	3	3	3	3	3	3	3	4	5	5	5	5	4	4	4	3	2	2	1	0	1	2
	18	16	13	13	9	9	6	5	6	5	5	5	5	6	7	5	6	4	6	5	4	5	4	5	6	6	4	3	3	3	3	5	4	7	7	8	8	8	6	7	6	5	3	3	2	1	1	0	1
	16	15	13	14	11	10	9	6	9	7	8	11	9	11	11	10	12	8	12	10	7	8	7	8	8	9	8	6	5	7	7	9	10	12	10	13	13	12	11	13	11	9	8	6	5	3	2	1	0
	19	18	16	14	13	11	12	10	12	11	12	11	12	15	15	14	16	17	16	16	17	14	14	13	14	13	10	11	11	13	13	16	16	15	18	17	16	16	16	16	17	12	13	12	11	8	4	3	1
	19	18	16	16	13	14	12	10	11	10	12	13	11	15	15	15	15	17	17	17	20	20	19	18	17	14	11	15	12	13	13	19	18	16	16	16	17	17	17	18	17	13	15	12	12	12	6	8	5
	15	14	11	10	10	8	6	5	6	7	7	8	8	10	10	7	8	9	7	8	9	7	8	9	9	9	7	7	6	6	7	7	7	7	8	9	9	9	7	9	7	7	5	6	6	5	5	5	4
	16	14	12	10	9	7	5	4	3	4	4	5	5	5	5	5	6	5	5	5	5	7	7	6	8	7	6	6	5	6	4	5	5	5	5	5	5	5	5	5	6	4	5	3	2	4	3	4	4
	16	14	11	10	7	6	4	3	4	3	4	4	4	5	5	5	5	5	4	5	5	5	5	5	6	6	5	4	4	4	4	5	4	5	5	6	6	5	5	5	5	4	4	3	3	3	3	3	3
	14	13	11	9	7	7	4	3	4	4	4	4	4	4	5	5	4	4	4	4	4	5	5	5	6	6	5	4	3	3	4	4	4	4	5	5	5	5	5	4	4	4	3	3	3	3	3	3	3
	14	12	9	9	7	6	4	3	3	3	3	4	4	4	4	4	4	4	4	4	4	4	5	5	6	6	5	4	3	4	4	3	5	3	5	4	4	4	4	4	3	4	3	3	2	3	3	3	3
	15	12	11	9	7	6	4	3	2	3	3	3	3	4	3	4	4	4	4	4	4	5	5	6	6	6	5	4	3	3	4	3	4	4	4	4	4	4	3	3	4	4	3	3	3	3	4	3	4
	15	13	10	10	7	8	4	4	3	3	3	4	4	5	5	4	4	4	4	4	4	4	4	5	5	5	5	3	3	3	4	4	4	4	4	5	5	4	4	4	4	3	2	3	2	3	3	3	4
	15	13	11	10	8	7	4	4	3	3	4	4	4	5	5	4	5	4	5	5	4	5	6	6	7	6	6	4	4	4	4	4	5	5	5	5	5	5	5	5	4	4	3	3	3	3	3	4	4
	15	12	9	9	7	6	4	3	3	3	3	3	3	4	4	3	4	4	4	4	4	4	4	5	5	6	5	4	3	3	3	3	3	3	3	4	4	3	3	3	3	3	2	3	3	3	3	4	4
	16	13	10	10	7	6	5	3	3	3	3	4	4	4	4	4	4	4	4	4	4	4	5	5	6	6	5	4	4	3	4	3	4	3	4	4	4	4	4	4	3	3	3	3	3	3	4	4	4
	16	13	9	9	6	6	4	3	2	2	2	3	3	3	3	3	3	3	3	3	3	3	4	5	5	6	5	3	3	3	3	3	2	2	3	3	3	2	2	2	2	2	2	2	2	3	3	4	4
	16	13	10	8	7	6	5	3	3	3	3	3	3	4	3	3	3	3	3	3	3	3	4	5	6	6	5	4	3	3	3	3	3	3	3	3	3	3	3	3	2	2	2	3	3	3	3	4	4
	18	14	11	9	7	6	5	3	2	2	2	3	3	3	3	3	3	3	3	3	3	3	3	4	5	5	5	3	3	2	2	2	2	2	3	3	3	3	2	2	2	2	2	2	2	3	3	3	4
	17	13	10	8	6	6	4	3	2	2	2	2	2	2	2	2	2	2	2	3	3	3	3	4	5	5	4	3	3	2	2	2	2	2	2	2	2	2	2	2	2	2	2	2	2	2	3	3	4
	16	14	10	9	6	6	3	2	2	2	2	2	2	2	2	2	2	3	3	3	3	3	4	4	4	6	4	3	2	2	2	2	2	2	2	2	2	2	2	2	2	2	1	2	2	2	2	3	3
	16	12	9	8	6	5	3	2	2	2	2	2	2	2	2	2	2	2	2	3	3	3	3	4	4	5	4	3	2	2	2	2	2	2	2	2	2	2	2	2	2	1	1	2	2	2	2	3	3
	16	12	10	8	6	6	3	2	1	1	1	2	2	2	2	2	2	2	2	2	2	3	3	4	4	5	4	3	2	2	2	2	2	2	2	2	2	2	2	2	2	1	1	1	2	2	2	3	3
	16	13	10	9	6	5	3	2	1	1	1	1	2	2	2	1	2	2	2	2	2	2	3	4	4	4	4	2	2	2	2	2	1	2	1	2	2	2	2	2	1	1	1	1	1	2	2	2	3
	16	12	10	9	7	6	3	2	2	1	1	1	2	2	2	2	2	2	3	3	3	3	4	4	5	5	4	3	2	2	2	2	2	2	2	2	2	2	2	2	2	1	1	1	1	2	2	3	3
	15	12	10	9	6	6	3	3	1	1	1	1	1	2	2	2	2	2	2	3	3	3	3	4	5	5	4	3	2	2	2	2	2	2	2	2	2	2	2	2	2	2	2	1	1	1	2	2	3
	16	13	11	10	6	5	3	2	1	1	1	1	1	2	1	1	2	2	2	2	2	3	3	3	4	5	4	3	2	2	2	2	2	2	1	2	2	2	2	2	2	1	1	1	1	1	2	2	2
	15	14	11	11	7	6	4	3	2	1	1	2	2	2	2	2	2	2	3	3	3	4	4	4	5	5	4	3	3	3	2	2	2	2	2	2	2	2	3	2	2	2	2	2	2	2	2	2	3
	17	12	10	10	7	6	4	3	2	2	2	2	2	2	3	3	3	3	3	4	4	4	4	4	6	6	6	4	3	3	3	3	3	3	2	3	3	3	3	3	3	3	3	2	2	2	2	2	3
	17	14	12	12	7	7	4	3	3	2	2	2	3	3	3	3	4	4	4	5	4	4	5	5	6	6	5	4	4	4	4	4	4	4	4	4	3	4	4	5	5	4	4	3	3	3	3	3	3
	18	14	12	12	9	7	5	5	3	3	3	3	2	3	3	3	4	3	4	4	4	4	4	5	6	6	6	4	3	3	3	4	3	4	4	4	5	5	4	4	4	4	4	2	2	2	3	3	4
	18	15	12	12	8	7	5	3	3	3	2	2	2	2	3	3	3	3	3	3	4	4	4	5	6	6	6	4	3	3	3	3	3	3	3	3	4	3	4	4	4	3	2	2	2	2	2	3	3
	16	14	11	11	8	6	4	3	2	2	2	2	2	2	2	2	2	2	2	3	3	3	4	4	4	4	4	3	2	2	2	2	2	2	2	3	3	3	3	3	3	2	2	1	1	1	2	2	3
	18	15	13	12	8	8	4	3	2	2	2	2	2	3	2	2	3	2	3	3	3	3	4	5	6	5	5	3	2	2	2	2	2	2	2	4	3	3	3	3	3	2	1	1	1	1	2	2	3
	16	13	10	9	6	6	3	2	1	1	1	1	1	2	2	2	2	2	2	2	2	2	3	4	5	4	4	2	2	1	1	1	1	2	1	2	2	2	2	2	1	1	1	1	1	1	1	2	2
	16	13	9	9	5	5	3	2	1	1	1	1	1	2	1	1	1	1	2	2	2	2	2	3	4	4	3	2	2	1	1	1	1	1	1	1	2	2	2	1	1	1	1	1	1	1	1	2	2
	16	12	9	8	5	5	3	2	2	1	1	1	1	2	2	1	2	1	2	2	2	2	3	3	4	4	4	2	2	1	1	1	1	1	1	2	2	2	2	1	1	1	1	1	1	1	2	2	2
	16	13	10	9	7	6	4	3	2	2	2	2	2	2	2	2	2	2	2	2	2	2	3	4	4	5	4	3	2	2	1	1	1	2	2	2	2	2	2	2	1	1	1	1	1	2	2	3	3
	16	13	10	10	6	5	4	3	2	2	2	2	2	2	2	2	2	2	2	2	2	2	3	3	4	4	4	3	2	2	1	1	1	1	1	2	2	2	2	1	1	1	1	1	2	2	2	3	3
	16	14	11	10	8	6	5	3	3	3	3	3	3	3	3	2	3	2	2	3	3	4	4	5	5	6	6	3	3	2	2	2	2	2	2	3	3	3	2	2	2	1	1	2	2	3	3	4	4
	16	13	11	10	8	7	6	4	4	4	4	4	5	4	5	4	4	4	4	5	4	4	5	5	6	7	6	5	5	3	4	3	3	4	3	4	4	3	4	3	3	2	3	3	3	5	5	5	6
	16	12	10	9	7	6	5	4	4	3	4	3	3	4	3	3	3	3	3	3	3	3	3	5	5	6	6	4	3	2	2	2	2	2	3	3	3	3	3	2	2	2	2	2	3	3	4	4	5
	16	13	11	10	8	7	6	5	4	4	5	4	4	4	4	4	4	4	4	4	4	4	4	5	5	6	6	4	4	3	3	2	3	3	4	4	4	4	3	3	3	3	2	3	3	4	4	4	5
	16	13	11	10	7	6	5	4	3	4	4	3	4	3	3	3	3	3	3	3	3	3	4	5	5	5	5	4	3	2	3	2	3	3	3	3	3	3	3	3	2	2	2	2	3	3	4	4	5
	15	12	10	9	6	5	4	3	3	3	3	3	3	3	3	3	3	3	3	3	3	3	3	4	4	5	5	3	3	2	3	2	2	3	2	3	3	3	3	2	2	2	2	2	2	3	3	4	4
	16	13	10	9	7	5	4	3	3	3	3	3	3	3	3	3	3	3	3	3	3	3	3	4	4	5	5	3	3	2	3	2	3	3	3	3	3	3	3	3	2	2	2	2	2	3	3	4	4
	15	12	9	8	6	5	4	4	3	4	3	4	4	4	4	3	3	3	3	3	3	3	3	4	4	5	5	3	3	3	3	3	3	3	3	4	4	3	3	3	3	2	2	3	3	3	3	4	4
	15	13	10	9	7	5	5	4	3	3	3	3	3	3	3	3	3	3	3	3	3	3	3	4	5	5	6	3	3	2	3	2	3	3	3	3	4	3	3	3	3	2	2	2	2	3	3	3	4
	15	14	11	10	8	6	5	4	4	4	3	4	4	4	4	3	4	3	3	3	3	3	4	5	5	6	6	4	3	3	3	3	3	3	3	4	4	3	3	3	3	2	2	3	3	3	3	4	5
	15	14	10	9	8	7	6	5	5	5	5	5	5	5	5	5	5	4	4	4	4	4	5	5	6	7	6	4	4	4	4	4	4	4	4	5	5	5	5	4	4	3	3	3	3	4	4	5	5
	16	14	11	10	9	8	7	6	6	6	6	6	6	6	6	5	5	5	5	4	4	4	5	5	7	7	7	5	5	4	4	4	5	4	5	5	6	5	5	4	4	4	4	4	4	4	5	5	6
	17	15	13	12	11	9	9	8	7	8	8	8	7	6	7	6	6	6	5	5	5	5	6	6	7	8	8	6	5	5	5	5	5	5	7	6	7	7	6	6	6	5	5	5	6	6	6	7	8
	18	16	12	11	10	9	8	6	6	6	6	6	7	7	7	5	5	5	5	4	4	5	5	6	7	8	7	6	5	5	5	5	5	5	5	6	6	5	5	4	4	5	5	5	5	5	5	6	7
	18	15	12	12	10	9	7	7	6	6	6	6	6	6	6	5	5	5	5	4	4	5	6	6	7	8	8	6	5	4	4	4	5	4	5	5	6	5	5	5	4	4	5	4	5	5	5	6	7
	17	15	12	11	10	8	8	7	6	7	6	7	6	6	6	6	5	5	5	5	4	5	5	5	7	7	7	6	5	5	4	5	5	5	5	6	6	6	5	5	5	5	5	5	5	5	6	6	7
	19	17	15	13	12	11	12	10	11	11	10	11	10	11	9	9	9	8	6	6	7	7	7	8	9	10	10	9	8	7	8	6	7	7	9	9	10	8	8	7	7	7	8	8	8	9	9	10	11
	17	15	12	11	9	8	7	6	6	6	6	6	6	6	6	6	5	5	5	4	4	4	5	6	6	7	7	6	5	5	4	4	4	4	5	5	6	5	5	4	4	4	4	4	5	5	6	6	7
	15	13	11	9	8	7	6	5	5	5	5	5	5	5	5	5	4	4	4	4	4	4	5	5	6	7	7	5	5	4	4	4	4	4	4	4	5	4	4	4	4	4	4	4	4	5	5	6	6
	17	14	11	9	8	6	6	4	4	5	4	5	5	5	5	4	4	4	4	4	4	4	4	5	5	6	6	5	4	4	4	4	4	4	4	4	5	4	4	4	3	3	3	4	4	4	5	5	5
	15	13	10	9	7	6	5	4	4	4	4	4	4	5	4	4	4	4	4	4	4	4	4	5	5	6	5	4	4	3	4	3	3	3	3	4	4	4	3	3	3	3	3	3	3	4	4	5	5
	16	13	10	9	7	6	5	4	4	4	4	4	4	4	4	4	4	4	4	3	3	4	4	5	5	6	6	4	4	3	3	3	3	3	3	4	4	4	3	3	3	3	3	3	3	3	4	4	5
	16	13	10	8	6	5	4	3	3	3	3	4	3	4	3	3	3	3	3	3	3	3	4	4	5	6	5	4	3	3	3	3	3	3	3	4	4	3	3	3	3	3	3	3	3	3	4	4	4
	15	13	10	8	6	5	4	4	3	3	3	3	3	4	4	4	3	3	3	3	3	3	4	4	5	5	5	4	3	3	3	3	3	3	3	3	4	3	3	3	3	3	3	3	3	3	4	4	4
	17	13	10	9	6	5	4	3	3	3	3	3	3	3	3	3	3	3	3	3	3	3	3	4	5	6	6	4	3	3	3	3	3	3	3	3	3	3	3	3	2	2	2	2	2	3	3	4	4
	16	12	9	8	6	5	4	3	3	3	3	3	3	3	3	3	3	3	3	3	3	3	4	4	5	5	5	4	3	3	3	2	3	3	3	3	3	3	3	3	2	2	2	2	2	3	3	3	4
	15	12	9	8	6	5	4	3	3	3	3	3	3	3	3	3	3	3	3	3	3	3	3	4	4	5	5	3	3	3	3	2	2	3	3	3	3	3	3	3	2	2	2	2	2	3	3	4	4
	16	12	9	8	6	5	4	3	3	3	3	3	3	3	3	3	3	3	3	3	3	3	3	4	5	5	5	3	3	3	3	2	3	2	3	3	3	3	2	2	2	2	2	2	2	3	3	4	4
	16	13	9	8	6	5	3	2	2	2	2	3	3	3	3	3	3	3	3	3	3	3	3	4	5	5	5	3	3	2	2	2	2	2	2	3	3	3	3	2	2	2	2	2	2	2	3	3	3
	14	12	9	7	5	4	4	3	2	2	3	3	3	3	3	3	3	3	3	3	3	3	4	4	5	5	5	4	3	3	2	2	2	2	2	3	3	3	2	2	2	2	2	2	2	3	3	3	4
	15	12	9	8	5	4	3	3	2	3	3	3	3	3	3	3	3	3	3	3	3	3	3	4	4	5	5	3	3	2	2	2	2	2	3	3	3	3	3	2	2	2	2	2	2	3	3	3	4
	17	13	9	7	5	5	3	3	2	2	2	3	3	3	3	3	3	3	3	3	3	3	3	4	5	5	5	3	3	2	2	2	2	2	2	3	3	3	2	2	2	2	2	2	2	3	3	3	3
	17	14	10	9	6	5	4	3	2	2	3	3	3	3	3	3	3	3	3	3	3	3	4	5	6	6	5	4	3	3	3	3	3	3	3	3	3	3	3	2	2	2	2	2	3	3	3	3	4
	17	14	9	8	5	4	3	3	2	2	3	2	3	3	3	3	3	3	3	3	3	3	4	4	5	6	4	3	3	2	2	2	2	2	2	3	3	3	2	2	2	2	2	2	2	2	3	3	4
	17	14	10	9	6	4	3	3	2	2	3	3	3	3	3	3	3	3	3	3	3	3	3	4	4	5	4	3	3	2	3	2	3	3	3	3	3	3	3	2	2	2	2	2	2	3	3	3	3
	16	13	10	8	6	5	3	2	2	2	2	2	3	3	3	3	3	3	3	3	3	3	3	4	5	5	5	3	3	3	2	2	2	3	3	3	3	3	3	2	2	2	2	2	2	3	3	3	3
	16	13	11	8	6	5	4	3	2	3	3	3	3	3	3	3	3	3	3	3	3	3	4	4	5	6	5	4	3	3	3	2	3	3	3	3	3	3	3	3	2	2	2	2	3	3	3	4	4
	16	13	9	8	6	5	4	3	3	3	3	3	3	3	3	3	3	3	3	3	3	3	3	4	4	5	4	3	3	2	3	3	3	3	3	3	3	3	3	3	2	2	2	2	2	3	3	4	4
	15	14	10	9	7	6	5	4	4	4	4	4	5	5	5	5	5	5	5	5	4	4	5	6	6	6	6	5	4	4	4	4	5	4	4	5	4	5	4	4	4	4	3	4	4	4	4	5	5
	15	13	11	9	7	6	4	3	3	3	3	4	4	4	4	4	4	4	5	5	5	5	5	6	7	7	6	6	5	4	4	4	4	4	4	4	4	4	4	4	3	3	3	3	4	4	4	5	5
	16	13	10	9	7	7	4	3	3	3	4	4	4	4	4	4	5	5	5	5	5	5	6	6	7	7	7	5	5	4	5	4	5	4	4	5	4	4	4	4	4	4	4	4	3	4	4	5	5
	15	12	11	10	8	7	5	4	4	4	4	4	5	5	5	5	5	5	5	6	6	5	7	7	8	8	7	6	6	5	5	4	5	5	4	5	5	4	5	4	4	4	4	4	4	4	4	5	5
	15	13	11	10	8	8	5	4	4	4	5	5	5	6	6	6	6	6	7	7	6	6	7	7	8	7	7	6	6	6	6	6	6	6	5	6	6	5	6	6	6	6	5	5	5	5	5	6	5
	16	14	12	10	8	7	5	4	4	4	4	4	5	5	5	5	5	5	5	5	5	4	5	5	6	6	5	5	4	4	4	4	4	4	4	5	5	5	4	4	4	4	4	4	3	4	4	4	5
	15	13	10	9	7	7	4	3	3	3	4	4	4	4	4	4	4	4	4	4	4	4	5	5	6	7	5	5	4	3	4	4	4	4	4	4	4	4	4	4	4	3	3	3	3	4	4	4	5
	14	14	11	8	6	6	4	3	3	3	3	4	4	4	4	4	4	4	4	4	4	4	4	5	5	5	4	4	3	3	3	3	3	3	4	4	4	4	4	3	3	3	3	3	3	3	3	4	4
	17	14	11	8	7	6	4	3	3	3	3	3	3	3	3	3	3	3	3	3	3	4	4	4	5	4	4	3	3	3	3	3	3	3	3	4	4	3	3	3	3	3	2	2	2	3	3	4	4
	16	15	10	9	7	6	5	4	4	4	4	4	4	5	4	4	5	5	5	4	4	4	5	5	6	5	5	4	4	4	4	4	4	4	4	5	5	4	4	4	4	3	3	3	3	4	4	4	5
	16	15	11	10	7	6	5	4	4	4	4	5	4	5	6	4	5	4	4	4	4	4	5	6	8	7	6	4	4	3	4	4	4	5	4	5	5	5	4	4	3	4	3	4	4	4	4	5	5
	16	14	10	8	6	5	4	3	3	3	3	3	3	3	3	3	3	3	3	3	3	4	4	5	5	6	5	4	3	3	3	3	3	3	3	3	3	3	3	3	3	2	2	2	3	3	3	4	4
	16	13	10	10	7	6	4	4	4	4	4	4	4	4	4	4	4	4	4	3	4	3	4	4	5	6	6	4	3	3	3	3	3	3	3	4	4	4	3	3	3	3	3	3	3	3	3	4	4
	15	12	10	8	6	5	4	3	3	3	3	3	3	3	3	3	3	3	3	3	3	3	4	4	5	5	5	4	3	3	3	3	3	3	3	3	3	3	3	3	2	2	2	2	3	3	3	4	4
	16	13	9	9	6	5	4	3	3	3	3	3	3	3	3	3	3	3	3	3	4	3	4	4	5	5	5	3	3	3	3	3	3	3	3	3	3	3	3	3	3	2	2	2	2	3	3	4	4
	18	15	11	10	7	6	4	3	3	3	3	3	3	3	3	3	3	3	3	3	3	3	4	5	5	6	5	3	3	2	2	2	3	3	3	3	3	3	3	3	2	2	2	2	3	3	3	4	4
	16	13	10	8	6	5	4	3	2	3	3	3	3	3	3	3	2	3	2	3	3	3	3	4	4	5	4	3	3	2	2	2	2	2	2	3	3	3	2	2	2	2	2	2	2	3	3	3	4
	16	13	10	9	7	5	4	3	3	3	3	3	3	3	3	3	3	3	3	3	3	3	4	5	5	5	4	3	3	2	2	2	2	2	3	3	3	3	2	2	2	2	2	2	2	3	3	3	4
	16	13	10	8	7	6	4	3	3	3	3	3	3	3	3	3	3	3	2	3	3	3	3	4	5	5	5	3	3	2	2	2	2	2	2	3	3	3	2	2	2	2	2	2	2	3	3	3	4
	16	13	10	10	8	7	6	4	4	4	4	4	4	4	4	3	3	3	3	3	3	3	4	5	5	6	6	4	4	3	3	3	3	3	3	3	4	3	3	3	2	2	2	3	3	3	4	4	5
	16	14	12	10	8	8	7	5	5	5	5	5	5	5	5	4	4	4	4	4	4	4	5	7	6	7	6	5	4	3	3	3	3	4	3	4	5	4	3	4	3	3	3	3	4	4	4	5	5
	17	14	11	12	8	8	6	6	5	5	5	5	5	5	5	5	4	4	4	4	5	4	5	7	8	8	8	6	5	4	4	3	4	3	4	4	4	4	3	3	3	3	3	4	5	4	5	6	7
	16	14	11	10	8	7	6	5	5	4	5	4	5	5	5	5	4	4	4	4	4	5	5	6	7	7	7	6	4	4	4	3	4	3	4	4	4	4	3	3	3	3	3	4	4	4	5	5	6
	17	14	11	10	7	6	4	3	3	3	3	3	3	4	3	3	3	3	3	3	3	3	4	4	5	6	6	4	3	3	3	3	3	3	3	3	3	3	3	3	2	2	2	3	3	3	3	4	4
	16	13	10	9	6	5	4	3	3	3	3	3	3	3	3	3	3	2	3	3	3	3	4	4	5	6	5	3	3	2	2	2	2	2	2	3	3	3	2	2	2	2	2	2	2	3	3	3	4
	18	13	11	8	7	6	4	3	3	3	3	3	3	3	3	3	3	3	3	3	3	3	4	5	5	6	4	3	3	2	2	2	2	2	3	3	3	3	3	2	2	2	2	2	2	3	3	4	4
	17	14	10	9	6	5	4	3	2	2	2	2	3	3	3	3	2	2	2	3	3	3	3	4	4	5	4	3	3	2	2	2	2	2	2	3	3	3	2	2	2	2	2	2	2	2	3	3	4
	17	15	12	11	9	8	6	4	4	4	4	4	4	4	5	4	4	4	4	4	4	4	5	5	7	6	5	4	3	3	3	3	3	4	4	4	4	5	4	4	3	3	2	3	2	3	3	4	4
	18	16	14	12	10	9	8	5	5	5	6	7	6	7	7	5	6	6	6	6	6	6	7	10	10	9	7	7	5	5	4	5	5	6	7	6	7	7	6	6	5	5	5	5	4	5	4	5	5
	19	16	14	13	11	10	8	7	5	6	8	6	7	6	6	8	6	7	6	6	6	6	6	8	8	8	7	6	4	3	6	5	8	6	8	6	6	7	6	6	6	5	3	4	4	4	5	6	5
	17	15	13	13	12	9	7	7	7	7	9	7	8	9	9	8	8	7	7	9	7	7	9	9	10	9	8	7	6	7	7	6	9	8	8	8	9	8	8	8	7	7	6	6	4	5	6	5	6
	16	15	12	11	10	10	9	7	8	8	9	8	9	8	9	10	8	9	8	7	7	8	8	8	9	8	8	6	6	7	8	8	10	7	9	8	8	10	7	9	8	8	6	8	5	5	5	6	6
	18	16	14	14	11	9	9	7	8	7	10	7	8	8	9	9	8	8	8	7	7	8	8	7	9	8	7	6	5	7	8	8	8	8	10	9	10	9	9	10	9	12	8	7	5	5	6	5	7
	16	16	15	14	11	9	9	9	11	11	12	13	13	11	13	12	11	12	11	10	11	10	9	9	9	8	8	7	7	10	11	9	14	11	13	11	13	12	11	12	10	13	10	11	7	8	7	7	9
	18	18	15	14	14	12	11	9	9	10	15	14	14	14	15	14	14	13	14	14	14	12	14	13	12	10	10	8	12	12	12	12	14	13	15	13	15	14	13	14	15	16	15	15	8	10	8	9	8
	18	18	17	16	17	14	14	11	15	16	14	19	17	20	20	19	20	19	20	22	18	17	18	17	16	16	14	14	17	18	17	18	21	20	17	20	18	16	18	17	18	15	17	16	14	14	14	12	12
	17	20	20	20	20	18	19	16	18	20	20	22	23	24	22	23	23	23	23	22	20	20	20	18	20	18	16	19	17	19	21	21	23	22	22	23	23	21	22	21	21	20	17	17	20	17	20	18	18
	16	21	21	19	21	19	19	18	19	22	22	23	23	25	24	23	25	23	24	24	23	22	21	20	17	16	16	16	19	17	20	22	23	25	24	25	25	25	25	25	24	22	20	21	18	17	17	18	19
	19	20	20	19	20	19	20	22	21	26	25	25	25	25	25	26	25	25	24	24	25	24	24	19	19	17	17	18	18	18	23	24	26	24	26	25	25	25	25	26	26	24	24	22	20	20	20	18	19
	20	22	22	20	23	22	22	23	25	27	26	27	26	28	28	26	28	25	26	25	25	23	24	22	20	18	18	18	21	22	24	24	25	28	27	28	27	27	27	28	28	25	24	23	22	22	21	21	21
	18	19	20	18	21	19	21	21	23	24	24	25	26	26	25	26	26	25	24	24	23	21	23	20	19	15	15	17	20	22	22	23	25	26	25	25	25	25	25	25	26	24	22	21	21	21	20	20	19
	18	20	20	19	21	19	21	20	24	24	23	25	24	26	26	25	26	24	25	25	23	21	21	19	18	14	14	17	20	20	23	24	24	27	26	26	26	26	26	26	26	24	22	22	19	21	18	18	18
	21	22	22	20	22	20	23	22	24	24	24	24	24	26	25	25	26	25	26	25	23	22	21	20	19	14	15	18	20	21	23	24	24	26	25	26	26	25	26	25	25	24	23	22	19	19	17	17	19
	22	22	21	22	22	22	21	23	24	24	24	24	23	23	25	24	25	24	24	25	23	22	20	18	16	14	14	17	19	21	23	24	24	26	25	25	25	25	25	26	25	25	23	24	20	20	17	18	17
	23	23	23	23	24	23	24	24	25	25	25	24	23	25	26	25	26	22	24	21	21	20	18	18	16	14	14	18	19	20	20	22	23	26	25	25	25	26	26	26	25	26	22	23	20	21	20	19	19
	22	22	22	20	21	20	20	22	22	23	23	23	24	24	25	22	24	21	22	21	21	17	17	17	15	13	14	17	16	16	20	17	22	23	22	24	24	23	23	21	21	21	17	19	17	19	16	17	18
	21	19	17	16	15	15	14	14	15	14	14	16	14	15	16	13	15	13	14	11	11	10	12	11	11	8	10	9	8	11	12	10	12	13	15	15	18	16	15	15	14	12	12	10	11	10	10	10	12
	17	14	12	11	9	8	7	6	6	6	6	6	7	6	6	6	6	6	5	5	6	5	7	7	7	6	6	5	5	5	5	5	5	6	6	6	6	6	6	6	5	5	5	4	5	5	5	5	6
	16	13	10	10	8	7	6	5	5	5	5	5	6	5	5	5	5	5	5	4	4	4	5	5	6	6	6	5	4	4	4	4	4	5	5	5	5	5	5	5	4	4	4	4	4	4	5	5	6
	17	13	11	10	7	6	5	4	4	4	4	4	4	4	4	4	4	4	4	4	3	4	4	5	5	5	5	4	3	3	3	3	3	3	4	4	4	4	4	3	3	3	3	3	3	3	4	4	5
	15	13	10	9	7	7	5	5	4	5	4	5	5	5	5	4	5	4	4	4	4	4	4	5	5	6	5	4	4	3	4	3	4	4	4	5	5	5	4	4	3	3	3	3	3	4	4	5	5
	17	14	11	10	7	6	4	4	4	4	4	4	4	4	4	4	4	4	4	4	4	4	4	5	6	6	6	4	3	3	3	3	3	4	4	4	4	4	4	4	3	3	3	3	3	3	4	4	5
	14	12	9	8	7	6	5	4	4	4	4	5	5	5	4	4	5	4	4	4	4	4	4	5	6	6	6	5	4	4	4	3	4	4	4	5	5	5	5	4	4	3	3	4	3	4	4	4	5
	15	13	10	9	7	6	5	4	4	5	5	5	5	5	5	5	5	5	5	5	4	5	5	6	7	6	6	5	4	4	4	4	4	4	4	5	5	5	5	5	4	4	4	4	4	4	4	4	5
	15	14	10	9	7	6	5	4	4	4	5	5	5	5	5	5	5	5	5	4	4	5	5	6	7	6	6	5	4	4	4	4	4	4	5	5	5	5	5	5	4	4	4	4	4	4	4	4	5
	15	13	10	9	8	6	5	4	4	5	5	5	5	5	5	5	5	5	5	5	4	4	5	6	7	6	6	5	4	4	4	4	4	4	4	5	5	5	5	4	4	4	4	4	4	4	4	5	5
	14	13	10	10	8	7	6	5	5	6	6	6	6	6	6	6	6	6	5	5	5	5	6	6	6	7	7	6	5	5	5	5	5	5	5	6	6	6	6	6	5	5	5	5	4	5	5	5	6
	16	14	10	11	9	8	7	6	6	7	7	7	7	7	7	7	7	7	7	7	6	6	7	8	9	8	8	7	6	5	5	6	7	6	7	7	8	7	7	7	6	6	6	6	5	5	6	7	7
	15	13	11	10	9	8	7	6	6	6	7	7	7	7	7	7	7	7	7	7	6	7	7	7	8	7	7	7	6	6	6	6	7	7	7	8	8	8	7	8	6	6	6	6	6	6	6	6	6
	16	15	12	11	9	8	7	6	6	7	7	7	8	8	8	7	8	8	8	8	7	7	8	8	8	8	7	7	7	6	7	7	7	7	7	8	8	7	8	7	7	6	6	6	6	6	5	6	7
	18	17	14	13	10	9	8	6	7	8	7	8	8	8	8	9	8	9	8	8	7	8	7	8	9	9	9	7	7	7	7	7	7	7	8	8	8	8	8	7	7	7	6	6	6	6	7	7	8
	16	15	13	11	8	8	6	6	5	7	6	6	7	7	6	6	7	7	6	7	6	6	7	7	9	8	8	7	6	5	6	5	6	6	6	7	6	6	6	6	5	6	5	6	5	6	6	6	6
	16	15	12	10	7	6	5	4	4	5	5	5	5	5	5	5	5	5	5	5	5	4	5	6	6	6	7	5	4	4	4	4	5	5	5	5	5	5	5	5	4	4	4	4	4	4	5	5	6
	16	14	11	8	7	6	5	4	4	4	4	4	5	5	5	5	5	4	4	4	4	4	5	5	6	6	5	4	4	4	4	4	4	4	4	5	5	5	4	4	4	4	3	4	4	4	4	5	5
	16	14	10	8	6	5	4	3	3	3	4	4	4	4	4	4	4	4	4	3	4	4	4	5	6	5	4	4	3	3	3	3	3	4	4	4	4	4	4	3	3	3	3	3	3	3	4	4	5
	18	15	11	9	6	5	4	3	3	3	3	3	3	4	4	4	3	3	3	3	3	3	4	5	6	5	5	4	3	3	3	3	3	3	3	4	4	4	3	3	3	3	3	3	3	3	3	4	5
	14	13	9	7	5	5	3	3	3	3	3	3	3	3	3	3	3	3	3	3	3	3	4	4	5	6	6	3	3	3	3	3	3	3	3	3	3	3	3	3	3	2	2	2	2	3	3	3	4
	15	12	9	8	6	5	4	3	3	3	3	3	3	3	3	3	3	3	3	3	3	3	4	4	5	5	5	3	3	3	3	3	3	3	3	3	3	3	3	3	3	2	2	2	2	3	3	3	4
	15	13	9	8	6	5	3	3	3	3	3	3	3	4	3	3	3	3	3	3	3	3	4	5	5	5	5	4	3	3	3	3	3	3	3	3	3	3	3	3	2	2	2	3	3	3	3	4	5
	16	13	9	8	5	5	3	3	3	3	3	3	3	3	3	3	3	3	3	3	3	3	4	4	5	6	5	3	3	3	2	2	2	3	3	3	3	3	3	3	2	2	2	2	2	3	3	3	4
	14	12	8	7	6	5	4	3	3	3	3	3	3	4	3	3	3	3	3	3	3	3	4	5	6	7	6	4	3	3	3	3	3	3	3	3	3	3	3	3	3	3	2	3	3	3	3	4	4
	14	12	8	8	5	4	3	3	3	3	3	3	3	3	3	3	3	3	3	3	3	3	4	4	5	5	5	4	3	3	3	2	2	3	3	3	3	3	3	3	2	2	2	2	2	3	3	3	4
	15	11	8	8	5	5	4	3	3	3	3	3	3	3	3	3	3	3	3	3	3	3	4	4	5	5	5	4	3	3	3	2	3	3	3	3	3	3	3	3	2	2	2	2	2	3	3	3	4
	14	11	8	7	5	4	3	3	3	3	3	3	3	3	3	3	3	3	3	3	3	3	3	4	4	5	5	3	3	2	2	2	2	3	3	3	3	3	3	2	2	2	2	2	2	3	3	3	3
	14	12	9	8	5	4	4	3	3	3	3	3	3	3	3	3	3	3	3	3	3	3	3	4	5	5	5	3	3	3	3	2	2	3	3	3	3	3	3	3	2	2	2	2	2	3	3	3	3
	14	12	8	7	6	5	4	3	3	3	3	3	4	4	3	3	3	3	3	3	3	3	4	4	5	5	5	4	3	3	3	3	3	3	3	3	3	3	3	3	2	2	2	3	3	3	3	4	4
	14	12	9	8	6	5	4	4	3	3	3	3	3	4	4	3	3	3	3	3	3	3	4	4	5	5	5	4	3	3	3	3	3	3	3	3	4	3	3	3	3	2	2	3	2	3	3	4	4
	14	12	9	8	6	5	4	3	3	3	3	3	3	4	3	3	3	3	3	3	3	3	4	4	5	5	5	4	3	3	3	3	3	3	3	3	4	3	3	3	3	2	2	3	3	3	3	4	4
	14	12	9	8	6	5	5	4	4	4	4	4	4	4	4	4	4	4	3	3	3	3	4	4	6	6	6	4	3	3	3	3	3	3	4	4	4	4	4	3	3	3	3	3	3	3	4	4	4
	15	13	10	9	7	6	5	4	4	4	5	4	4	4	5	4	4	4	4	3	3	3	4	5	6	6	6	5	4	4	3	3	3	3	4	4	4	4	4	4	3	3	3	3	4	4	4	5	5
	15	13	9	9	7	6	5	5	4	4	5	5	5	5	5	5	4	4	4	4	4	4	4	5	6	6	6	4	4	3	3	4	4	4	4	5	5	4	4	4	4	3	3	4	4	4	4	4	5
	15	12	9	9	7	6	5	5	4	4	4	4	5	4	4	4	4	4	4	4	4	4	4	5	5	6	6	5	4	3	3	3	3	4	4	4	4	4	4	4	3	3	3	3	3	4	4	4	5
	16	13	10	9	7	6	5	5	4	5	4	5	5	4	5	4	4	4	4	4	4	3	4	5	6	6	6	4	4	4	3	3	3	4	4	4	4	4	4	4	3	3	3	3	3	4	4	4	5
	15	13	10	9	8	7	6	5	5	5	5	5	5	5	5	5	5	5	4	4	4	4	5	5	7	6	6	5	4	4	4	4	4	4	5	5	5	5	5	4	4	4	4	4	4	4	4	5	5
	15	14	11	10	9	8	7	6	6	6	6	6	7	6	6	6	5	6	5	5	5	5	6	7	8	8	7	6	5	5	5	5	5	5	6	6	6	6	6	5	5	5	5	5	5	5	5	6	6
	17	15	12	11	10	9	8	8	7	8	7	8	8	8	8	7	6	7	6	5	5	5	6	7	9	8	8	6	6	5	5	5	6	6	7	7	8	7	7	6	6	5	5	5	6	5	6	7	7
	16	14	11	10	9	8	7	6	6	7	7	7	7	6	7	6	6	6	5	5	5	5	6	6	7	7	6	5	5	5	5	5	6	5	6	6	6	7	6	6	5	5	5	5	5	5	5	6	6
	15	13	10	10	9	8	7	7	6	6	7	7	7	7	7	7	6	7	6	6	6	5	6	8	9	7	7	6	6	5	6	5	6	6	6	7	7	8	7	6	6	6	6	5	5	5	5	6	6
	17	14	12	11	9	9	7	7	7	7	8	8	8	8	8	8	7	7	7	6	7	6	8	9	9	7	8	8	6	6	6	6	7	7	8	8	8	8	7	7	7	7	7	6	6	6	6	6	6
	17	14	12	11	9	8	7	7	6	6	6	6	7	7	6	6	6	7	5	6	5	5	6	7	8	6	6	6	5	5	5	5	6	6	6	7	7	7	6	7	6	5	5	5	5	5	5	6	6
	16	13	10	10	8	7	6	6	6	6	6	6	6	6	6	6	6	5	5	5	5	5	5	6	7	8	6	5	5	5	5	4	5	5	6	6	6	7	6	6	5	5	5	5	4	5	5	5	6
	17	14	11	10	8	7	5	5	5	5	5	5	5	5	5	5	5	4	4	4	4	4	5	6	7	6	6	5	4	4	4	4	4	5	5	5	5	5	5	5	4	4	4	4	4	4	4	5	5
	15	13	10	10	8	7	6	5	5	5	5	5	5	6	5	5	5	5	4	4	4	4	4	6	7	6	6	5	4	4	4	4	4	4	5	5	5	5	5	5	4	4	4	4	4	4	4	5	5
	14	12	9	9	7	6	5	5	5	5	5	5	5	5	5	5	5	5	4	4	4	5	5	5	6	6	5	4	4	4	4	4	4	4	5	5	6	6	5	5	4	4	4	4	3	4	4	4	5
	14	12	9	9	7	6	5	5	5	5	5	5	5	5	5	5	5	5	5	4	4	5	5	6	7	6	6	5	4	4	4	4	4	4	5	5	5	5	5	5	4	4	4	4	4	4	4	5	5
	15	13	10	9	7	6	5	5	5	5	5	5	5	5	5	5	5	4	5	4	4	5	5	6	7	7	6	5	4	4	4	4	4	4	5	5	5	5	5	5	4	4	3	4	4	4	4	5	5
	14	13	10	10	8	7	6	5	5	5	5	5	5	5	5	5	5	5	5	5	5	5	5	6	6	7	5	5	5	4	4	4	5	5	5	5	6	6	5	5	4	4	4	4	4	4	4	5	5
	14	12	10	9	8	7	7	6	6	6	6	6	6	7	7	6	7	6	6	5	6	6	6	7	7	6	6	6	6	5	5	6	6	6	6	7	7	7	7	6	6	6	5	5	5	5	5	6	6
	13	12	9	9	8	7	7	6	7	7	7	7	7	7	7	7	7	7	6	6	6	6	7	8	8	8	7	7	6	6	6	6	6	6	7	7	7	7	7	7	6	6	6	6	6	6	6	6	6
	14	13	11	9	8	7	7	6	6	6	6	6	6	6	6	6	6	6	5	6	6	5	6	7	7	7	7	6	6	5	5	5	5	5	6	6	6	6	6	6	5	5	5	5	5	5	6	6	6
	14	13	10	9	8	7	6	6	5	6	6	6	6	6	6	6	6	6	5	5	5	6	6	6	7	6	7	6	5	5	5	5	5	5	5	6	6	6	6	5	5	5	5	5	5	5	6	6	6
	15	13	10	9	8	7	6	5	5	5	5	5	5	5	6	5	5	5	5	4	4	5	5	5	5	6	6	5	5	4	4	4	4	5	5	5	5	5	5	5	4	4	4	4	4	4	5	5	5
	14	13	9	8	7	6	5	4	4	4	5	5	4	5	5	5	4	4	4	5	4	4	5	5	6	6	5	5	4	4	4	4	4	4	5	4	5	5	4	4	4	4	4	3	4	4	4	5	5
	14	12	9	8	7	6	6	5	5	5	5	5	5	5	5	5	5	4	4	4	4	4	4	4	5	5	5	4	4	4	4	4	4	4	4	5	5	5	5	4	4	4	4	4	4	4	4	4	5
	15	13	10	9	7	6	6	5	4	5	4	4	5	5	5	4	4	4	4	4	4	4	4	5	5	6	5	4	4	4	4	4	4	4	4	5	5	5	4	4	4	4	3	4	3	4	4	5	5
	15	13	10	9	8	7	6	5	5	5	5	5	5	5	5	5	5	4	4	4	4	4	5	5	5	6	5	5	4	4	4	4	4	4	4	5	5	5	5	4	4	4	4	4	4	4	4	5	5
	15	13	11	10	8	8	8	7	7	7	7	7	7	7	7	7	7	6	6	6	6	6	5	6	6	7	6	6	6	6	5	5	6	6	7	7	7	7	7	7	6	6	5	6	5	6	6	6	6
	15	13	11	10	8	8	7	6	7	7	7	6	7	7	7	7	6	6	6	6	6	6	6	6	7	7	7	6	6	5	5	5	5	5	6	6	7	6	6	5	5	5	5	5	5	6	6	6	7
	15	13	10	9	8	7	6	5	5	5	6	5	5	5	5	5	5	5	5	5	5	5	5	6	6	7	6	6	5	5	5	4	5	4	5	5	5	5	5	5	4	4	4	5	4	5	5	6	6
	15	12	10	9	8	7	6	5	5	5	5	5	6	5	6	5	5	5	4	5	5	4	5	5	5	6	5	5	4	4	4	4	4	4	5	5	5	5	5	5	4	4	4	4	4	4	5	5	6
	14	12	10	8	7	6	6	5	5	5	5	5	6	6	5	5	5	5	5	5	5	5	4	6	5	6	5	5	5	4	5	4	5	5	5	5	6	5	5	5	4	4	4	4	4	5	5	5	6
	14	12	10	9	7	6	5	4	5	5	5	5	5	5	5	5	5	4	4	4	4	5	4	5	5	5	5	5	4	4	4	4	4	4	4	5	5	5	5	4	4	4	3	4	3	4	4	5	5
	14	12	9	8	6	5	4	4	4	4	4	4	4	4	4	4	4	4	4	4	4	4	4	4	5	5	5	4	4	3	3	3	3	3	4	4	4	4	4	3	3	3	3	3	3	4	4	4	4
	14	13	10	8	7	6	5	4	4	4	4	4	5	5	4	4	4	4	4	4	4	4	4	5	5	5	5	4	4	3	4	3	4	4	4	4	4	4	4	4	3	3	3	3	3	4	4	5	5
	13	11	9	8	7	5	5	4	4	4	4	5	5	5	5	4	4	4	4	4	4	4	4	5	5	6	5	5	4	4	4	4	4	4	4	4	5	4	4	4	4	3	3	4	3	4	4	5	5
	14	11	8	7	6	5	4	3	3	3	3	4	4	4	4	4	3	3	3	3	3	3	3	4	4	4	4	4	3	3	3	3	3	3	3	4	4	4	4	3	3	3	2	3	2	3	3	4	4
	15	12	9	7	6	5	4	3	3	4	3	4	4	4	4	4	4	4	3	4	4	3	4	4	5	5	5	4	4	3	3	3	3	3	3	4	4	3	3	3	3	3	3	3	3	3	3	4	4
	13	11	8	8	6	5	5	4	4	4	4	4	5	4	4	4	4	4	4	4	4	4	4	4	5	5	5	4	4	3	4	3	4	4	4	4	5	4	4	4	3	3	3	3	3	4	4	4	5
	13	10	8	7	6	5	5	4	4	4	4	4	4	4	4	4	4	4	4	4	4	4	4	5	5	5	5	4	4	3	3	3	4	3	4	4	4	4	4	4	3	3	3	3	3	4	4	4	4
	13	11	8	8	6	5	4	3	3	3	4	3	3	4	4	4	3	3	4	4	3	4	4	5	5	6	5	4	3	3	3	3	3	3	3	4	4	4	4	3	3	3	3	3	3	3	3	4	4
	13	12	9	9	7	5	5	4	4	4	4	4	4	4	4	4	4	4	4	4	4	4	5	5	6	6	5	4	4	4	4	3	4	4	4	4	4	4	4	4	3	3	3	3	3	4	4	5	5
	12	11	9	7	6	5	5	4	4	4	4	5	5	5	5	5	5	5	4	4	4	4	5	6	6	6	6	5	5	4	4	4	4	4	5	5	5	5	4	4	4	4	4	4	4	4	4	5	5
	14	12	10	9	7	7	6	5	5	6	5	6	6	6	6	6	6	6	6	6	5	5	6	6	7	6	6	6	6	5	5	5	5	5	5	6	6	6	6	5	5	5	5	5	5	5	5	5	6
	12	11	9	8	7	6	5	5	5	5	5	6	6	6	6	6	5	6	6	6	6	5	6	6	7	7	7	6	5	4	5	5	5	5	5	6	6	5	6	5	5	4	4	5	4	5	5	5	5
	14	13	10	8	7	6	5	5	5	5	5	5	5	6	6	5	5	5	5	5	5	5	5	6	6	7	6	6	5	5	5	5	5	5	5	5	5	5	5	5	5	5	4	5	4	5	5	5	6
	14	11	10	8	7	6	6	5	5	5	6	5	6	6	6	6	6	6	6	6	6	6	6	7	7	7	6	6	6	5	5	5	5	5	5	6	6	6	6	5	5	5	5	5	5	5	5	5	5
	13	11	9	9	7	7	5	5	5	5	5	6	6	6	6	6	6	6	5	5	5	5	5	6	6	7	7	5	5	5	5	5	5	5	5	6	6	5	5	5	5	5	5	5	5	5	5	5	6
	15	12	9	8	6	5	4	4	4	4	4	4	4	4	4	4	4	4	4	4	4	4	5	5	5	6	5	5	4	4	4	4	4	4	4	4	4	4	4	4	4	3	3	4	3	4	4	5	5
	13	11	9	7	6	5	4	4	4	4	4	4	4	4	4	4	4	4	4	4	4	4	4	5	6	6	6	4	4	4	4	4	4	4	4	4	4	4	4	4	4	3	3	3	3	4	4	4	4
	15	13	10	7	6	5	4	4	3	4	4	4	4	4	4	4	4	4	4	4	4	4	4	4	5	5	5	4	4	3	3	3	3	3	3	4	4	4	4	3	3	3	3	3	3	3	4	4	4
	17	15	10	8	6	5	4	3	3	3	3	3	4	4	3	3	3	3	3	4	4	3	4	5	5	5	5	4	4	3	3	3	3	3	3	3	3	3	3	3	3	3	2	3	3	3	3	4	4
	16	13	10	8	6	5	4	4	3	4	4	4	4	4	4	4	4	4	4	4	4	4	4	5	5	5	5	4	4	3	4	4	4	4	4	4	4	4	4	3	3	3	3	3	3	4	4	4	4
	15	12	8	8	6	5	4	3	3	3	3	4	4	4	4	4	4	4	4	4	4	4	4	5	5	5	5	4	4	3	3	3	3	3	3	4	3	4	3	3	3	3	3	3	3	3	3	4	4
	14	12	9	8	6	5	4	3	3	3	3	3	3	4	3	3	3	3	3	3	3	3	4	4	4	5	4	4	3	3	3	3	3	3	3	3	3	3	3	3	3	3	2	3	3	3	3	4	4
	16	14	10	9	6	5	4	3	3	3	3	3	4	4	4	4	4	3	4	4	4	3	4	4	5	5	5	4	4	3	3	3	3	3	3	4	4	3	3	3	3	3	3	3	3	3	3	4	4
	14	12	8	8	6	5	4	3	3	4	4	4	4	5	4	4	4	4	4	4	4	4	4	5	5	5	5	4	4	3	4	4	4	4	4	4	4	4	4	4	3	3	3	3	3	4	4	4	5
	14	12	9	8	6	5	4	3	3	3	3	3	4	4	4	4	4	4	4	4	4	4	4	4	5	5	5	4	4	3	3	3	3	3	3	4	4	3	3	3	3	3	3	3	3	3	3	4	4
	14	13	9	9	6	5	4	4	3	4	4	4	4	4	4	4	4	4	4	4	4	4	4	4	5	6	5	4	4	3	3	3	3	3	3	4	4	3	3	3	3	3	3	3	3	4	4	4	4
	14	13	10	9	7	6	5	4	5	5	5	5	5	5	5	5	5	5	5	5	5	5	5	5	5	6	6	5	5	4	4	4	4	4	4	5	5	5	4	4	4	4	4	4	4	4	4	5	5
	14	12	9	9	7	6	5	4	4	5	5	5	6	5	5	5	5	5	5	5	5	5	5	5	6	6	6	5	5	5	4	4	4	4	4	5	5	4	4	4	4	4	4	4	4	4	5	5	5
	14	13	10	8	7	5	5	4	4	4	4	4	5	5	5	5	4	5	5	4	5	5	5	5	6	6	6	5	5	4	4	4	4	4	4	5	4	4	4	4	4	4	4	4	4	4	4	5	5
	15	14	11	10	9	7	7	6	6	6	6	6	7	7	7	6	6	6	6	6	6	6	6	6	7	8	7	6	6	6	5	6	6	6	6	6	6	6	6	5	5	5	5	5	5	6	6	7	7
	15	14	11	11	9	8	8	6	6	6	6	6	7	7	7	6	7	6	6	6	6	6	6	7	7	8	8	7	6	6	6	6	6	5	6	7	6	6	6	6	5	5	5	6	5	6	6	7	7
	14	13	11	10	9	7	7	6	6	6	6	6	7	7	7	7	7	7	6	6	6	6	6	7	7	8	8	7	6	6	6	5	6	6	6	7	7	6	6	5	5	5	5	6	6	6	6	7	7
	15	14	13	12	10	10	10	8	8	8	8	8	9	9	9	9	8	8	8	8	8	8	8	9	9	9	9	9	9	8	8	8	8	7	8	8	8	8	8	8	8	8	8	8	8	8	8	8	9
	15	14	12	11	9	9	8	8	8	8	8	8	9	9	8	8	8	8	7	7	7	6	6	8	8	9	8	8	8	7	8	6	7	8	8	8	8	8	7	7	6	7	7	7	7	7	8	8	8
	15	14	11	10	9	8	7	6	6	5	6	6	6	6	6	6	5	5	5	5	5	5	5	6	6	7	7	6	5	5	5	4	5	5	5	6	6	5	5	5	4	4	4	5	5	5	6	6	6
	16	14	11	10	9	8	7	6	6	6	6	6	6	6	6	6	5	6	5	5	5	5	5	6	6	7	7	6	5	5	5	5	5	5	5	5	5	5	5	5	5	5	5	5	5	5	6	6	7
	16	13	11	10	8	8	7	6	6	6	6	6	7	7	7	7	6	6	5	6	6	5	6	7	7	8	7	6	6	5	6	6	5	5	6	6	6	5	5	5	5	5	5	5	5	6	6	7	7
	15	13	10	9	8	7	7	6	5	5	6	6	6	6	6	6	6	5	5	5	5	5	5	6	5	6	6	5	5	4	5	4	5	5	5	6	6	5	5	5	5	4	4	4	4	5	5	6	6
	16	14	11	10	8	7	6	5	5	5	5	5	5	5	5	5	4	4	4	4	4	4	4	5	5	6	6	5	4	4	4	4	4	4	4	5	5	4	4	4	4	4	3	4	4	4	5	6	6
	17	14	11	10	8	8	6	5	5	5	5	5	5	6	5	5	5	5	5	4	4	4	5	6	6	7	6	5	5	4	4	4	4	4	5	5	5	5	4	4	4	4	4	4	4	4	5	5	6
	15	12	11	10	8	8	7	6	6	6	6	6	6	6	6	6	5	6	5	5	5	5	5	6	6	7	6	6	6	5	5	4	5	5	5	5	6	5	5	5	5	5	4	5	5	5	6	6	6
	15	13	10	9	8	7	6	5	4	4	4	4	5	5	5	4	4	4	4	4	4	4	4	5	5	6	5	5	4	4	4	4	4	4	4	4	5	4	4	4	3	3	3	3	3	4	4	5	5
	17	15	11	11	8	7	6	5	5	5	5	5	5	5	5	5	4	4	4	4	4	4	5	5	6	6	6	5	4	4	4	4	4	4	5	4	5	5	4	4	4	4	3	4	4	4	5	6	6
	18	14	12	11	9	9	8	6	6	6	6	6	7	6	6	6	5	5	5	5	5	5	5	7	7	8	7	6	6	5	5	5	5	5	6	5	6	5	5	5	5	5	4	5	5	5	6	6	7
	17	14	12	11	9	9	8	7	7	7	7	7	8	7	7	7	6	7	6	6	6	6	6	7	8	8	8	7	7	6	6	6	6	6	6	7	7	6	6	6	6	6	6	6	6	6	7	7	7
	17	15	12	11	9	8	7	6	6	6	6	6	6	6	6	6	5	5	5	5	5	5	5	6	7	7	7	6	5	5	5	5	5	5	5	5	6	5	5	5	5	5	5	5	5	5	6	6	6
	18	15	13	11	10	10	8	7	7	7	7	7	7	7	7	6	6	6	6	6	6	5	6	7	7	8	7	6	6	6	5	5	5	6	6	6	7	6	6	5	5	5	5	5	6	5	6	7	7
	17	14	12	12	10	10	9	8	8	8	8	8	8	8	8	8	7	7	6	7	7	6	7	8	7	8	8	7	7	6	7	6	7	6	8	7	8	7	7	7	6	7	6	7	7	7	8	8	8
	17	14	11	11	9	8	7	6	6	6	6	6	6	6	6	6	5	5	5	5	5	5	5	6	6	6	5	5	5	4	5	4	5	5	5	5	6	5	5	5	4	5	5	4	4	5	5	6	6
	18	15	12	11	9	9	8	6	6	6	6	6	6	6	6	6	5	5	5	5	5	5	5	6	6	7	7	6	5	5	5	5	5	5	6	6	6	6	6	5	5	5	5	5	5	5	5	6	6
	17	14	12	11	9	9	8	7	7	7	7	7	7	7	7	7	6	6	5	6	6	5	6	7	7	7	7	6	6	6	5	5	6	5	6	6	7	7	6	6	5	5	5	6	6	6	6	7	7
	15	13	11	10	8	8	7	6	6	6	6	6	6	6	6	6	5	5	5	5	5	5	5	6	6	6	6	5	5	4	5	4	5	5	6	6	6	6	5	5	5	5	4	5	4	5	5	6	6
	17	14	11	10	9	8	6	5	5	5	5	5	5	5	5	5	5	4	4	4	4	5	5	5	6	6	6	5	4	4	4	4	4	4	4	5	5	5	5	5	4	4	4	4	4	4	5	5	5
	17	14	12	11	9	8	7	6	6	6	5	6	6	6	6	5	5	5	5	5	5	4	5	6	6	7	6	5	5	4	5	5	5	5	5	5	6	5	5	5	5	4	4	4	4	5	5	5	6
	16	13	11	10	8	8	7	6	6	6	6	6	6	6	6	6	6	6	5	5	5	5	5	6	7	7	6	6	5	5	5	4	5	5	6	6	6	6	5	6	5	5	5	5	5	5	6	6	6
	16	14	11	10	9	9	7	6	7	6	6	6	6	6	6	6	6	5	5	5	5	5	5	6	6	6	6	5	5	5	5	4	5	5	6	6	6	6	6	6	5	5	5	5	4	5	5	5	6
	17	15	12	11	9	9	7	6	6	6	7	6	7	6	6	6	6	6	5	5	5	5	5	6	6	6	6	6	5	5	5	5	5	5	6	6	6	6	6	6	5	5	5	5	5	5	6	6	6
	17	14	12	10	9	9	8	6	7	7	7	7	7	7	7	6	5	6	5	5	5	5	5	6	6	7	6	6	5	5	5	5	5	5	6	6	7	6	6	6	5	5	5	5	5	5	6	6	7
	16	14	11	10	9	8	8	7	7	7	7	7	7	7	7	7	7	7	6	6	6	6	6	8	7	8	6	7	6	6	6	5	6	6	7	7	7	7	7	6	6	6	5	6	5	6	6	7	7
	16	15	12	12	10	10	9	8	7	7	7	7	7	7	7	8	6	7	6	6	6	6	6	7	7	7	6	7	6	6	6	6	6	6	6	7	7	7	6	6	6	6	6	6	5	6	6	7	7
	17	15	12	12	10	10	8	8	7	7	8	7	8	8	7	7	7	7	7	7	7	6	7	8	7	7	7	7	7	6	7	6	7	7	7	7	8	8	7	7	6	6	6	6	6	7	7	7	7
	18	15	14	13	11	11	10	9	9	10	10	10	10	10	10	9	9	9	8	8	8	7	7	8	8	9	8	9	8	7	9	7	9	9	9	9	10	10	9	9	8	8	8	9	8	9	8	10	10
	18	17	14	14	14	12	12	11	11	12	12	12	11	11	12	12	11	11	10	10	10	9	9	11	10	11	9	10	10	10	10	10	11	10	11	12	12	12	11	11	10	10	10	10	10	11	10	11	11
	19	17	16	15	15	14	14	13	12	12	12	12	13	12	12	12	10	12	10	10	10	10	10	11	11	10	10	11	11	10	11	10	11	11	11	11	12	12	11	12	11	11	11	11	10	11	10	11	12
	19	16	15	15	14	13	12	12	12	12	12	13	12	12	13	11	11	11	10	10	10	9	10	11	10	10	10	10	10	10	11	10	10	11	11	12	12	12	12	11	10	10	10	11	10	10	10	11	12
	21	18	16	16	16	16	15	15	15	15	15	16	14	14	15	14	14	13	14	12	13	12	11	13	13	13	11	14	14	12	13	12	13	13	14	14	15	15	14	14	13	13	13	13	12	13	13	14	14
	20	19	17	17	17	17	17	16	15	15	15	14	14	13	15	15	13	14	13	13	13	13	13	14	13	13	12	13	13	12	13	13	15	13	14	14	15	16	13	15	13	13	14	14	12	13	13	13	14
	20	20	17	17	17	16	16	15	15	15	15	15	16	15	16	16	13	15	14	13	14	13	14	15	15	13	13	15	14	14	15	13	14	14	15	14	15	16	15	15	15	15	14	15	13	13	14	14	14
	21	20	17	19	17	16	15	16	15	15	16	16	14	15	15	15	15	13	14	13	13	13	13	13	12	14	13	14	13	13	15	13	14	14	15	15	16	16	15	15	14	14	14	14	14	13	13	14	14
	21	19	17	17	18	16	17	16	15	16	17	16	15	16	16	16	15	14	14	12	13	13	12	15	13	14	12	13	14	12	14	13	15	15	16	16	16	18	15	17	15	14	14	14	12	14	13	14	14
	21	20	18	18	18	17	17	15	16	16	15	16	15	15	16	15	13	15	13	12	14	12	14	15	16	14	13	14	15	12	13	13	14	13	14	14	16	16	15	16	13	14	14	14	13	13	13	13	14
	22	20	18	18	17	16	15	15	15	14	15	15	15	15	15	13	14	14	14	13	15	12	13	14	15	14	12	13	13	11	14	12	13	14	15	15	16	16	15	15	15	13	13	13	13	13	12	13	13
	21	19	18	19	17	17	17	16	16	17	17	17	15	16	17	15	16	15	15	12	14	13	13	14	13	12	13	14	13	13	14	13	15	15	17	16	17	18	17	18	16	15	15	15	13	13	14	14	14
	21	20	18	18	18	17	19	16	17	16	18	17	15	16	17	17	16	15	15	13	14	16	15	16	14	14	12	15	15	14	15	13	15	15	16	17	17	19	16	18	15	15	15	15	12	14	13	15	14
	22	21	19	20	21	18	20	16	18	18	18	17	17	18	20	17	16	16	16	14	16	14	16	16	17	14	16	15	15	14	15	14	15	17	18	17	19	20	18	18	16	16	15	16	14	15	14	14	15
	22	20	19	19	18	18	17	17	17	17	17	19	16	17	18	16	16	15	16	14	15	15	15	14	15	13	14	15	12	13	14	15	15	17	18	16	18	19	18	19	17	15	16	15	15	13	14	14	14
	23	22	20	20	20	20	19	19	18	19	19	20	16	17	18	19	18	17	18	13	14	17	15	15	16	13	13	14	14	15	16	16	18	18	20	18	18	20	17	20	18	17	16	17	13	14	14	15	15
	23	22	20	20	22	20	21	17	19	18	17	19	16	17	20	18	16	16	17	13	16	15	17	16	16	14	14	16	15	15	15	15	15	15	18	17	20	20	18	20	16	16	15	16	14	15	14	15	15
	24	22	20	21	21	20	19	19	19	19	19	19	18	19	21	18	18	18	20	15	17	18	18	19	17	14	16	16	16	15	16	16	17	19	19	19	21	21	19	20	18	18	16	17	16	17	16	15	15
	24	22	21	22	21	21	19	20	19	20	20	21	18	19	20	21	19	18	19	14	15	19	18	16	18	14	17	18	14	18	18	17	19	19	20	20	20	20	19	20	20	19	19	19	17	16	17	16	16
	26	23	22	24	22	22	21	20	20	19	22	21	18	19	21	21	19	18	19	15	16	20	19	17	18	16	19	17	16	19	18	17	20	19	20	21	21	22	19	22	19	19	19	19	18	16	17	16	16
	25	23	21	22	23	22	22	19	22	20	21	20	19	20	22	20	20	18	20	16	18	19	19	18	18	15	19	18	17	17	18	18	18	21	20	20	21	22	21	22	20	20	18	19	16	18	17	17	18
	25	24	22	23	21	21	21	21	20	21	21	22	21	22	21	22	20	21	21	18	20	21	21	19	20	17	19	19	18	20	21	19	20	20	21	20	21	22	20	21	21	19	22	20	21	20	20	19	18
	26	25	23	24	24	24	23	22	22	22	23	22	21	20	22	23	21	21	21	17	18	22	22	18	21	16	20	19	18	23	22	20	22	21	23	22	23	23	21	23	22	22	23	22	22	18	20	18	17
	27	26	24	25	25	25	24	21	22	22	22	23	19	20	22	22	19	19	20	18	19	20	22	21	22	18	18	19	18	20	19	19	20	19	22	21	23	23	22	22	22	20	20	19	20	19	20	19	19
	27	26	25	26	24	25	25	22	24	23	24	24	22	22	23	22	23	21	22	19	21	23	21	20	21	18	21	19	20	21	20	21	20	23	22	23	24	26	23	24	23	22	22	22	20	21	20	19	20
	25	25	24	25	24	23	23	23	22	23	23	24	22	23	23	25	24	23	23	20	20	25	24	20	22	18	20	21	20	24	23	22	23	22	23	23	23	24	22	23	24	23	25	23	24	22	22	19	20
	27	26	25	26	24	23	24	22	22	23	24	23	21	21	23	24	22	21	22	20	20	23	23	20	23	19	21	20	20	22	22	21	22	21	23	23	23	23	21	23	22	22	24	22	23	21	23	19	20
	28	27	25	26	26	26	25	23	24	24	25	24	22	22	25	24	24	22	25	21	21	23	23	20	23	19	22	21	21	23	21	23	22	23	23	25	25	25	22	24	23	23	24	23	24	22	22	21	21
	26	26	26	26	25	26	25	25	25	26	26	26	24	24	25	26	24	24	24	21	23	25	24	20	22	19	22	21	22	25	23	23	24	23	25	24	25	25	24	25	24	24	26	25	25	23	24	20	22
	28	27	27	27	27	26	26	26	26	26	27	26	25	25	26	26	25	26	25	23	22	26	26	23	24	21	22	22	23	26	24	25	25	24	26	26	26	27	24	26	27	25	27	25	27	23	25	24	23
	28	28	27	27	27	27	27	27	26	27	28	28	26	27	27	28	25	26	26	24	23	26	26	25	25	23	25	24	25	27	25	25	26	25	27	26	27	27	26	26	26	26	27	26	27	25	26	24	25
	29	29	28	29	29	29	29	29	29	29	30	29	28	28	29	29	29	28	29	27	27	29	28	26	27	26	28	27	27	29	28	29	29	29	29	29	29	29	28	29	29	29	29	29	29	28	28	27	28
	29	29	29	29	29	29	29	30	29	29	30	29	29	29	29	30	29	29	29	28	28	29	30	28	29	27	29	28	29	30	29	29	29	29	29	29	29	29	28	29	29	29	30	29	30	29	29	29	28
	30	30	30	30	30	30	29	30	30	30	30	30	30	30	30	30	30	30	30	29	29	30	30	28	29	27	29	29	29	30	30	30	29	29	30	30	30	30	29	29	30	30	30	30	30	30	30	29	30
	30	30	30	30	30	30	30	31	31	31	31	31	30	31	30	30	30	30	30	30	29	31	30	30	30	29	29	29	30	30	30	30	30	30	30	30	30	31	30	31	30	30	31	30	30	30	30	30	30
	30	30	30	30	30	30	30	30	30	30	31	30	30	30	30	31	30	31	31	30	30	31	31	30	30	29	30	30	30	31	31	30	30	30	30	30	30	31	30	30	30	31	31	30	31	30	30	30	30
	30	31	31	31	31	31	31	31	31	31	31	31	30	31	31	31	31	31	31	31	30	31	31	30	30	30	30	31	31	31	31	31	31	31	31	31	31	31	31	31	31	31	31	31	31	31	31	30	31
	31	31	31	31	31	31	31	31	31	31	31	31	31	31	31	31	31	31	31	31	31	31	31	31	30	30	30	31	31	31	31	31	31	31	31	31	31	31	31	31	31	31	31	31	31	31	31	30	30
	31	31	31	31	31	31	31	31	31	31	31	31	31	31	31	31	31	31	31	31	30	31	31	30	30	29	30	30	30	31	31	31	31	31	31	31	31	31	31	31	31	31	31	31	30	30	30	30	30
	30	31	31	30	31	31	31	31	31	31	31	31	30	31	31	31	31	31	31	31	30	31	30	30	30	29	30	30	30	31	31	31	31	31	31	31	31	30	31	31	31	31	31	31	31	31	30	29	30
	30	30	30	30	30	30	30	30	30	30	31	30	30	30	30	30	30	30	30	30	29	30	30	30	30	29	30	30	30	30	30	29	30	30	30	30	30	30	30	31	30	30	30	30	30	29	30	29	29
	30	30	30	30	30	30	30	31	31	31	31	30	30	30	31	30	30	30	30	30	29	30	30	30	30	28	29	30	29	30	30	30	30	30	30	31	31	31	30	30	30	31	30	30	30	30	29	28	29
	30	30	30	30	30	30	30	30	30	30	31	30	30	30	30	30	30	30	30	30	29	31	30	29	29	27	29	29	29	30	30	30	30	30	30	30	30	30	30	30	30	30	30	30	30	30	30	28	30
	30	30	30	30	30	30	30	30	31	31	31	30	30	30	30	30	30	30	30	30	29	30	30	30	30	28	29	30	29	30	30	30	30	30	30	31	30	30	30	30	30	30	30	30	30	29	30	29	29
	29	29	29	29	29	30	29	30	30	30	30	30	30	30	30	30	30	30	30	29	29	30	30	29	29	27	29	29	29	30	30	29	30	29	30	30	30	30	29	29	30	30	30	30	30	29	30	28	29
	30	30	29	30	30	30	30	29	30	30	30	30	30	30	30	30	29	29	29	29	29	29	29	29	28	28	28	29	28	29	28	28	29	29	29	29	29	29	29	29	30	29	29	29	29	28	29	29	29
	29	29	29	29	29	29	29	29	29	29	30	29	29	30	30	29	29	29	29	29	27	28	28	27	26	26	27	28	28	28	29	28	29	29	29	29	29	29	29	29	29	28	28	29	29	28	28	27	29
	30	30	29	30	30	30	30	30	30	30	30	30	29	30	30	29	30	29	30	29	27	29	29	27	28	27	28	29	28	29	29	29	29	29	30	30	29	30	29	30	30	29	29	29	29	29	29	28	29
	29	29	29	29	28	29	28	28	29	29	29	28	29	28	29	29	28	29	29	29	29	29	29	29	29	28	29	29	29	29	28	27	29	27	28	28	28	29	27	28	28	29	29	28	29	27	29	29	29
	30	30	29	29	29	30	29	30	30	30	30	29	30	30	30	30	29	30	29	30	29	29	29	29	28	28	29	30	29	29	30	28	30	29	29	29	30	29	28	29	29	29	30	30	30	30	30	29	30
	30	30	30	29	30	29	30	29	29	29	29	29	29	29	29	29	28	28	29	28	28	28	28	27	27	27	29	27	27	28	29	28	28	28	28	29	29	29	29	29	28	28	29	29	29	28	29	28	29
	29	29	29	29	29	30	29	29	30	30	30	30	30	29	30	30	29	30	30	29	28	29	29	28	28	25	28	29	28	29	29	28	29	29	29	29	30	29	29	30	29	30	29	29	29	29	29	28	29
	29	29	29	29	28	29	28	28	30	29	30	29	29	29	29	29	29	30	29	29	29	29	29	29	29	28	29	29	29	30	29	28	29	28	28	29	29	29	28	29	29	29	29	28	29	29	29	30	29
	30	29	29	29	29	29	30	30	30	30	30	30	30	30	30	30	30	29	30	29	28	29	28	28	27	25	26	28	28	29	30	29	29	29	29	30	30	30	29	29	30	29	29	29	29	29	29	27	29
	30	30	30	30	30	30	30	30	30	30	30	30	29	30	30	29	30	29	29	29	28	29	28	27	27	25	26	27	27	28	29	29	29	29	28	30	30	30	29	29	30	29	29	29	29	29	28	27	28
	30	29	29	29	29	30	29	30	30	30	31	30	30	30	30	30	30	30	30	30	28	30	29	29	28	26	28	29	29	30	30	30	30	30	30	30	30	30	30	30	30	30	30	30	30	30	29	28	29
	30	29	30	29	30	30	30	30	30	30	30	30	30	30	30	30	30	30	30	30	30	30	30	29	28	28	29	30	29	30	30	30	30	30	30	30	30	30	30	30	30	30	30	30	30	30	30	29	29
	30	30	30	30	30	30	30	30	30	31	30	30	31	30	30	30	30	31	30	30	30	30	29	29	28	26	28	29	29	30	30	30	30	30	30	30	30	30	30	30	30	30	30	30	30	30	29	29	30
	30	30	30	30	31	30	31	31	31	31	31	31	30	31	31	30	31	30	31	30	30	30	29	29	28	27	28	29	29	30	30	30	30	31	30	31	31	31	31	31	31	31	30	31	30	30	30	29	29
	30	30	30	30	30	30	30	31	31	31	31	31	31	31	31	31	31	31	31	30	30	31	30	30	29	28	30	30	30	31	30	30	30	30	30	31	31	31	31	31	31	31	31	31	30	31	30	29	30
	31	31	31	30	31	31	31	31	31	31	31	31	31	31	31	31	31	31	31	31	30	31	31	30	30	29	30	30	30	31	31	31	31	31	31	31	31	31	31	31	31	31	31	31	31	31	31	30	31
	31	31	30	31	31	31	31	31	31	31	31	31	31	31	31	31	31	30	31	30	30	31	30	30	30	28	30	30	30	31	30	31	31	31	31	31	31	31	31	31	31	31	31	31	31	31	30	30	30
	31	30	30	30	31	31	31	31	31	31	31	31	31	31	31	31	31	31	31	31	31	31	31	30	30	29	30	31	31	31	31	31	31	31	31	31	31	31	31	31	31	31	31	31	31	31	31	30	31
	30	30	30	30	30	31	31	31	31	31	31	30	31	31	31	31	31	31	31	31	30	31	31	30	30	29	30	31	31	31	31	31	31	31	31	31	31	31	31	31	31	31	31	31	31	31	31	30	31
	30	30	30	29	30	30	30	30	31	31	31	31	31	31	31	31	31	31	31	31	30	30	31	30	30	29	30	30	31	31	31	30	31	30	31	30	31	30	31	30	31	31	31	31	31	31	31	30	30
	30	30	30	30	30	30	30	31	31	31	31	31	31	31	31	31	31	31	31	31	30	31	30	29	30	28	29	30	30	30	31	30	31	30	30	30	30	31	30	31	31	31	30	31	30	30	30	29	30
	30	30	30	30	30	31	30	30	30	30	31	31	31	31	30	30	30	31	31	30	29	30	30	29	29	27	29	29	30	30	31	30	30	30	30	30	30	30	30	30	30	30	30	31	30	30	30	30	30
	29	29	29	29	30	30	30	30	30	31	30	30	31	30	30	31	30	31	30	30	30	30	30	30	30	28	30	30	30	30	31	30	30	30	30	30	30	30	30	30	30	30	31	31	31	31	31	30	30
	30	30	30	30	29	30	29	30	30	30	30	30	30	30	30	30	30	30	30	30	30	30	30	30	30	29	29	30	30	30	30	29	30	29	30	30	30	30	29	30	30	30	30	30	31	30	30	30	30
	30	30	30	30	30	31	30	30	31	30	31	30	30	31	30	30	30	30	30	30	29	30	30	28	29	26	28	29	29	30	30	30	30	30	30	30	30	30	30	30	30	30	30	30	30	29	30	28	30
	29	29	29	30	30	30	30	30	30	30	30	30	30	30	30	30	30	30	30	30	30	30	30	30	29	28	29	30	30	30	30	30	30	30	30	30	30	30	30	30	30	30	30	30	30	30	30	29	30
	29	29	29	28	29	29	29	29	29	29	30	29	30	30	30	30	29	30	29	30	30	29	30	30	30	29	29	30	30	30	30	29	30	29	29	29	29	29	28	29	29	29	30	30	30	30	30	29	30
	29	30	30	29	29	30	29	29	29	29	30	28	29	29	29	29	28	29	29	29	28	29	29	29	29	28	29	29	29	29	29	28	29	28	28	28	28	29	27	28	29	29	29	28	29	27	29	28	29
	30	29	29	29	30	30	30	30	30	30	30	30	30	30	30	30	30	30	30	29	28	29	29	28	29	26	28	29	28	29	29	29	29	30	30	30	30	30	29	30	30	30	30	29	30	28	29	27	29
	29	29	28	28	28	29	28	29	30	30	30	29	30	29	29	30	29	30	29	29	29	29	29	29	29	27	29	29	29	29	29	29	29	29	29	29	29	29	29	29	30	29	29	30	30	30	30	29	29
	29	29	28	29	29	29	28	29	29	29	30	28	29	29	30	29	29	30	29	29	29	30	30	30	29	29	29	30	30	29	29	29	29	28	29	29	28	29	27	29	29	29	30	29	30	29	30	29	29
	29	29	29	29	29	29	29	29	29	29	30	29	29	29	29	30	28	29	29	28	28	29	29	28	28	27	29	29	27	28	28	28	28	28	29	29	28	29	28	29	29	28	29	29	29	28	30	27	28
	30	30	30	30	30	30	29	29	30	30	30	29	30	30	30	30	29	30	30	30	29	29	30	29	29	28	29	30	29	29	29	29	29	29	29	30	30	30	29	29	30	30	30	29	30	29	30	29	30
	30	29	30	30	30	30	30	30	30	30	30	29	30	30	30	29	29	29	29	29	28	29	30	29	30	29	30	30	28	29	29	29	29	29	30	29	30	30	29	30	30	30	30	29	30	28	30	28	30
	31	30	30	30	31	31	30	31	31	31	31	30	30	31	31	31	30	30	31	30	29	30	30	29	30	27	30	30	28	30	30	30	30	30	30	30	30	30	30	30	30	31	30	30	29	29	30	28	29
	30	30	30	30	30	30	30	30	30	30	30	30	29	29	30	30	29	28	30	29	28	30	30	29	29	27	29	29	27	29	29	29	29	29	30	30	30	30	29	30	30	30	30	29	29	28	29	27	29
	29	29	29	29	29	29	28	29	29	29	30	29	29	29	29	29	28	29	28	28	29	29	29	29	29	28	29	29	28	29	28	27	28	27	28	28	28	28	27	28	28	29	29	29	29	28	29	28	29
	30	30	30	30	29	30	30	30	30	30	30	30	30	30	30	30	30	30	30	30	30	30	30	30	29	28	29	29	29	30	30	29	30	29	30	30	30	30	29	30	30	30	30	30	30	29	30	29	30
	30	29	30	29	29	30	29	30	30	30	30	29	30	30	30	30	29	29	30	29	29	30	30	28	30	27	29	29	28	30	30	29	30	29	29	30	29	30	29	30	30	30	30	30	30	29	29	28	29
	30	30	30	29	29	29	29	29	30	29	30	29	28	29	30	30	29	29	30	29	28	30	30	29	29	29	28	28	29	30	29	29	29	29	29	29	29	30	29	30	30	29	30	29	30	28	30	28	29
	29	29	30	29	29	30	29	30	30	30	30	29	30	30	30	30	29	30	30	30	30	30	30	30	30	29	29	30	30	30	30	29	30	29	29	29	29	30	28	29	30	30	30	30	30	30	30	28	30
	29	29	29	29	30	30	30	30	30	30	30	30	30	30	30	30	30	30	30	30	29	30	30	29	30	28	29	29	29	30	30	29	30	29	30	30	30	30	29	30	30	30	30	30	30	29	29	27	29
	29	29	29	29	30	30	29	29	30	30	30	30	29	30	30	29	29	29	29	29	29	29	29	29	29	27	26	28	28	29	28	28	29	28	29	29	29	30	29	29	30	29	29	29	29	28	29	27	29
	29	28	29	29	28	29	28	29	29	29	29	29	29	29	29	29	28	29	29	28	28	29	29	29	28	27	28	29	28	29	28	28	28	28	28	29	28	29	28	29	29	29	28	28	29	28	28	26	28
	30	29	29	29	29	30	29	29	29	29	30	28	29	29	29	29	29	29	29	29	28	30	29	29	29	28	29	29	28	30	28	28	29	28	29	28	28	29	27	28	29	29	28	29	30	28	29	27	29
	30	29	30	29	29	30	29	29	29	30	30	29	29	30	30	29	29	29	30	30	28	29	30	29	29	28	28	30	29	29	29	29	30	28	29	29	29	29	28	29	30	29	29	29	30	29	29	28	29
	29	28	29	28	29	29	29	29	29	29	29	29	30	30	30	29	29	30	29	29	29	29	29	29	29	27	28	29	29	29	29	29	29	29	29	30	29	29	28	30	29	29	29	29	29	29	29	28	29
	29	29	28	29	28	29	28	29	29	29	29	28	29	29	29	29	28	29	28	28	28	29	28	29	28	28	27	28	28	28	28	28	28	27	28	28	28	28	28	28	29	28	28	28	29	27	28	27	28
	30	29	29	29	29	30	28	29	30	30	30	29	30	30	30	30	29	30	30	30	29	29	30	30	30	28	29	30	29	30	29	28	30	29	30	29	29	30	28	30	30	30	30	30	30	29	30	27	30
	29	29	29	29	29	29	29	30	29	30	30	29	30	29	30	29	29	30	29	29	30	29	30	30	29	28	30	30	30	30	29	29	29	29	29	29	29	29	29	29	29	29	29	30	30	30	30	30	30
	30	30	30	30	30	30	30	30	31	31	31	30	30	30	31	30	30	30	30	30	30	30	30	30	30	29	29	30	30	30	30	30	30	30	30	30	30	30	30	30	30	30	30	30	30	30	30	29	30
	29	28	29	29	29	29	28	30	29	29	29	29	30	29	30	29	29	30	29	29	29	29	30	29	29	28	29	29	29	29	29	29	29	29	29	29	29	29	29	29	30	29	30	29	30	29	30	28	29
	30	29	29	29	29	30	29	29	29	30	30	30	30	30	30	29	30	30	29	30	29	29	30	29	29	28	28	29	30	29	29	29	29	29	29	29	29	30	29	29	30	29	30	29	30	29	29	27	29
	30	29	30	29	30	30	30	30	30	30	30	30	30	30	30	30	30	30	30	30	30	30	29	28	28	26	28	29	29	30	30	29	30	30	30	30	30	30	30	30	30	30	30	30	29	30	30	28	29
	30	30	29	29	30	30	30	30	30	30	30	30	30	30	30	30	30	30	30	30	29	30	29	29	28	27	28	29	29	29	30	29	29	30	29	29	30	30	30	30	30	30	30	30	29	29	28	27	28
	30	30	30	30	30	31	30	30	30	31	31	30	31	31	30	30	30	30	31	30	29	30	30	29	29	28	29	30	30	30	30	30	30	30	30	31	30	30	30	30	30	30	30	30	30	30	30	29	30
	30	29	30	29	29	29	29	29	29	29	30	29	29	30	30	29	29	29	29	29	29	29	29	29	28	28	29	29	29	29	28	28	29	28	29	29	29	29	28	29	29	29	29	29	29	28	28	29	29
	30	29	29	29	30	29	29	29	29	30	29	30	29	30	30	29	30	29	29	29	28	29	29	28	28	27	28	28	28	28	29	28	29	29	28	29	30	29	29	29	29	28	29	29	29	29	28	27	28
	30	30	30	29	29	30	30	29	30	30	30	30	30	30	29	29	30	30	30	30	29	30	29	28	27	26	26	28	30	29	30	29	29	30	29	30	30	30	29	30	29	29	29	29	29	30	29	28	29
	30	30	30	30	29	30	29	30	30	30	30	29	30	30	30	30	29	29	29	29	29	29	30	29	29	28	28	29	29	30	29	28	29	29	29	29	29	29	29	29	29	29	29	29	30	29	29	29	30
	30	29	30	29	30	30	29	29	30	30	30	29	29	30	30	30	30	30	30	30	30	29	30	29	29	28	28	29	30	30	30	29	29	29	29	30	29	30	29	29	29	30	29	29	29	29	29	28	29
	29	29	29	29	30	29	30	29	29	30	30	30	29	30	30	29	29	29	30	29	29	29	29	28	28	26	28	28	29	28	29	29	29	29	28	29	30	30	30	29	29	29	29	29	29	29	29	27	28
	30	30	30	30	30	31	30	30	31	31	31	30	30	30	30	30	30	30	31	30	30	30	29	29	28	27	28	29	29	29	30	30	30	30	30	30	30	30	30	30	30	30	30	30	30	30	30	29	30
	30	29	29	29	29	30	29	29	29	29	30	29	28	28	29	29	28	29	28	29	28	28	30	29	29	28	29	29	28	29	28	28	29	28	28	29	29	29	28	29	29	29	29	29	30	28	29	29	29
	30	30	30	29	30	30	30	30	30	30	31	30	30	30	30	30	30	29	30	30	29	30	29	29	28	27	27	29	29	30	30	29	30	29	29	30	30	30	30	30	30	30	30	30	29	28	30	28	29
	30	30	30	30	30	30	30	30	30	30	31	31	30	31	31	30	31	30	30	30	30	30	30	30	28	27	28	29	29	30	31	30	30	30	30	31	30	30	30	30	30	30	30	30	30	30	29	27	29
	30	30	30	30	30	30	30	30	30	30	31	30	30	30	30	30	30	30	30	30	29	30	30	29	29	27	28	29	29	29	30	29	30	30	30	30	30	30	29	30	30	30	30	30	30	29	29	29	29
	30	30	30	30	30	30	29	30	30	30	30	29	28	29	30	29	29	28	29	29	29	29	30	29	30	28	29	30	28	30	28	28	29	29	29	30	30	30	29	29	30	29	30	29	29	28	29	28	29
	30	30	30	30	31	30	30	31	31	31	31	31	30	31	31	30	31	30	31	31	30	30	30	30	29	28	29	30	30	30	30	30	30	31	30	31	31	31	30	31	30	30	30	30	30	29	30	28	30
	31	31	31	30	31	31	31	31	31	30	31	31	30	31	31	30	30	30	31	31	30	30	30	30	30	28	29	29	29	30	30	30	30	31	30	31	31	30	30	30	30	30	30	30	29	29	29	29	29
	31	30	30	30	30	30	30	30	31	30	30	30	29	29	30	30	29	30	30	29	29	30	30	30	30	28	30	30	29	30	29	29	30	30	30	30	30	30	29	30	30	30	30	30	31	29	30	29	29
	30	30	30	30	30	30	30	30	31	30	31	30	29	30	30	30	30	29	30	30	29	30	30	30	30	28	30	30	29	30	29	30	30	30	30	30	31	31	31	30	31	30	29	30	30	30	30	27	29
	30	31	31	30	31	30	31	30	31	30	31	31	30	31	31	30	30	30	31	30	30	31	30	30	30	28	30	30	29	30	30	30	30	31	30	31	31	31	31	30	30	30	30	30	29	29	29	28	30
	31	31	31	30	31	31	31	31	31	31	31	31	30	30	30	31	30	30	30	30	29	30	30	29	30	28	29	30	30	30	30	30	30	30	30	31	31	31	31	31	30	30	30	30	30	29	30	29	30
	30	31	30	30	31	30	30	30	31	30	30	30	29	30	30	30	30	29	30	29	29	30	30	30	30	29	30	30	29	30	29	30	30	30	30	30	31	31	30	31	30	30	30	29	30	28	29	27	29
	31	31	31	31	31	31	31	31	31	31	31	31	31	31	31	31	31	30	31	31	30	31	31	31	31	30	30	31	30	31	31	30	31	31	31	31	31	31	31	31	31	31	31	30	31	30	31	30	31
	31	31	31	31	31	31	31	31	31	31	31	31	30	31	31	30	31	30	31	31	30	31	31	31	31	30	30	30	29	30	30	30	30	31	31	31	31	31	31	31	31	31	30	29	30	30	30	30	31
	31	31	31	31	31	31	31	31	31	31	31	31	30	31	31	30	30	30	31	30	30	31	31	31	31	30	30	31	30	30	30	30	30	30	31	31	31	31	31	31	31	31	30	30	30	30	31	30	31
	31	31	31	31	31	31	31	31	31	31	31	31	30	31	30	30	30	29	30	30	30	31	31	31	31	30	30	31	30	30	30	30	30	30	31	31	31	31	31	31	31	30	30	30	30	31	30	29	30
	31	31	31	31	31	31	31	31	31	31	31	31	30	31	31	30	31	29	29	30	30	31	30	31	31	30	30	31	30	30	30	30	29	31	31	31	31	31	31	31	31	31	31	31	31	31	30	30	31
	30	30	30	30	30	30	30	30	31	30	31	31	30	31	30	29	30	29	30	29	30	31	30	31	30	29	30	30	30	30	30	30	30	29	30	30	31	31	30	31	30	31	31	31	30	31	30	30	30
	31	31	31	31	31	31	31	31	31	31	31	31	30	30	31	31	30	29	30	30	30	30	31	31	30	30	30	30	30	31	30	30	31	30	31	31	31	31	31	31	31	31	31	31	30	30	31	30	31
	31	31	31	31	31	31	31	31	31	31	31	31	30	31	31	31	29	30	30	29	30	30	31	31	31	30	30	30	31	31	29	30	29	30	31	31	31	31	31	31	30	31	30	31	31	30	31	30	31
	31	31	31	31	31	31	31	31	31	31	31	31	31	31	31	31	30	30	30	30	30	31	31	31	31	30	30	31	30	31	30	30	31	30	31	31	31	31	31	31	31	31	31	31	31	31	31	31	31
	30	31	31	31	31	31	31	31	31	31	31	31	30	31	31	30	30	30	30	30	30	30	31	31	30	30	31	31	30	30	30	30	30	30	30	31	31	31	31	31	30	31	31	31	31	31	31	30	31
	31	31	31	31	31	31	31	31	31	31	31	31	31	31	31	31	30	30	30	31	30	31	31	31	31	30	31	31	31	31	31	30	31	31	31	31	31	31	31	31	31	31	31	31	31	31	31	31	31
	30	31	31	31	31	31	31	31	31	31	31	31	31	31	31	31	30	30	30	30	30	31	30	31	30	30	30	31	31	31	30	30	30	30	31	31	31	31	31	31	31	31	31	31	31	31	31	31	31
	30	30	30	31	31	31	31	31	31	31	31	31	31	31	31	31	31	30	31	30	30	31	31	31	31	30	30	31	31	31	31	30	31	30	31	31	31	31	31	31	31	31	31	31	31	31	31	30	31
	31	31	31	31	31	31	31	31	31	31	31	31	31	31	31	31	31	31	31	31	30	31	30	31	30	30	30	31	31	31	31	30	31	30	31	31	31	31	31	31	31	31	31	31	31	31	31	31	31
	30	30	30	30	31	31	31	31	31	31	31	31	31	31	31	31	31	30	30	31	30	30	30	30	30	29	29	31	30	31	30	30	31	30	31	31	31	31	31	31	31	31	31	31	31	31	30	30	30
	30	30	30	31	31	31	31	31	31	31	31	31	31	31	31	31	31	31	31	31	30	31	31	31	30	30	30	31	30	31	31	31	31	31	31	31	31	31	31	31	31	31	31	31	31	31	31	30	30
	30	30	30	30	31	30	30	31	31	31	31	31	31	31	31	31	31	31	31	31	30	30	30	30	29	29	29	30	30	31	30	30	31	30	31	31	31	31	31	31	31	31	31	31	31	30	30	30	30
	30	30	30	30	31	31	31	31	31	31	31	31	31	31	31	31	31	31	31	31	30	31	31	30	30	29	30	31	30	31	31	30	31	31	31	31	31	31	31	31	31	31	31	31	31	31	30	30	30
	30	30	31	30	31	30	31	30	31	31	31	31	30	31	31	31	31	31	31	31	30	30	30	31	30	29	29	30	30	30	31	31	31	31	31	31	31	31	31	31	31	31	31	31	30	30	30	29	30
	29	30	30	30	31	31	31	30	31	31	31	31	30	31	31	30	31	30	31	31	30	30	30	30	29	28	29	30	30	30	30	30	31	31	31	31	31	31	31	31	31	31	31	31	30	30	30	28	29
	30	31	31	30	31	31	31	31	31	31	31	31	30	31	31	31	31	30	31	31	30	30	31	30	30	29	30	30	30	30	30	31	31	31	31	31	31	31	31	31	31	31	30	31	30	30	30	29	30
	30	30	29	30	30	30	30	30	31	30	31	30	30	30	31	30	31	30	30	30	30	30	30	29	29	28	29	29	29	29	30	30	30	30	30	31	30	31	31	30	30	30	30	30	29	29	30	28	28
	30	31	30	30	31	31	31	31	31	31	31	31	30	31	31	31	31	30	31	31	30	30	30	30	30	29	29	30	30	30	30	31	31	31	31	31	31	31	31	31	31	31	30	31	30	30	30	30	30
	30	30	30	30	30	30	31	30	31	31	31	31	30	30	31	30	30	30	31	30	30	30	30	29	29	27	29	30	29	30	30	30	30	31	30	31	31	31	31	31	31	31	30	30	30	30	30	29	30
	30	30	30	30	30	30	30	31	31	31	31	31	30	31	31	31	30	30	31	30	30	30	30	30	29	29	29	30	30	30	30	31	31	31	30	31	30	31	30	31	31	31	30	31	30	30	30	30	30
	30	30	30	30	31	30	30	30	31	30	31	31	30	31	31	30	30	30	31	30	30	31	30	30	29	29	29	30	29	30	31	30	30	31	30	30	30	31	30	31	31	30	30	30	30	30	30	29	30
	30	30	30	30	31	30	30	30	31	31	31	31	30	31	31	31	30	30	31	30	30	30	30	29	29	29	29	30	29	30	30	30	31	30	30	31	31	31	30	31	31	31	31	31	30	30	30	29	30
	29	30	30	30	30	30	30	30	31	31	31	31	30	31	31	30	31	30	30	30	30	30	30	30	29	29	29	29	29	29	30	30	30	30	30	31	31	30	30	30	31	30	29	30	29	29	29	29	29
	29	30	30	30	30	30	30	30	31	30	31	30	30	30	30	30	31	30	31	30	29	30	30	29	29	29	29	30	29	29	30	30	30	30	30	30	30	31	30	30	30	30	30	30	30	29	30	29	29
	29	30	29	30	30	30	30	30	31	31	31	31	30	31	31	30	30	30	30	30	29	30	30	29	29	29	28	29	30	29	30	30	30	31	30	30	30	30	30	31	30	30	30	30	30	29	30	29	29
	28	29	29	29	30	30	30	30	30	30	30	30	30	30	30	30	30	30	30	30	29	30	29	29	29	28	29	29	29	29	30	29	30	30	29	30	30	30	30	30	30	30	30	29	29	29	30	29	29
	27	29	29	29	30	30	30	30	30	30	30	30	30	30	30	30	30	30	30	30	30	30	29	29	29	28	28	29	29	28	30	30	30	30	30	31	30	30	30	30	30	30	30	29	29	29	29	30	29
	28	29	29	30	30	30	30	30	31	30	31	31	30	30	30	30	30	30	30	30	30	30	29	29	28	28	29	29	29	29	30	30	30	30	30	30	30	30	30	30	30	30	30	30	29	30	29	29	30
	28	29	29	30	30	30	30	30	30	31	31	31	30	30	30	31	30	30	30	30	29	30	29	29	28	28	29	29	29	30	30	30	30	30	30	30	30	30	30	31	31	30	30	30	30	29	29	29	29
	27	28	28	29	29	30	30	30	30	30	31	30	30	30	30	30	30	30	30	30	30	30	29	29	29	28	28	29	30	30	30	30	30	30	30	30	30	30	30	30	30	30	30	30	30	30	30	30	30
	28	29	28	29	29	29	30	30	30	30	31	30	30	31	30	30	30	30	31	30	30	30	29	29	28	27	29	29	30	30	31	31	30	31	31	30	30	30	30	30	31	30	30	30	30	30	29	29	29
	28	29	28	29	30	29	30	30	30	31	31	30	30	30	30	30	30	30	30	30	29	30	29	29	28	28	29	29	29	29	30	30	30	30	30	30	30	31	30	31	30	30	30	30	29	30	29	29	30
	27	29	28	29	30	29	30	30	30	30	30	30	30	30	30	30	30	30	30	30	29	30	29	29	27	27	27	29	29	30	30	30	30	30	30	30	30	30	30	30	30	30	30	30	30	30	29	28	29
	28	29	29	29	30	30	30	30	30	30	30	30	30	30	30	30	30	30	30	30	29	30	29	29	28	28	27	29	29	29	30	30	30	30	30	30	30	30	30	30	30	30	30	30	29	29	29	29	29
	28	29	29	30	30	30	30	30	31	30	31	30	30	30	30	30	30	30	30	30	30	30	30	30	29	29	29	30	29	30	30	30	30	31	30	30	30	31	30	31	31	31	30	30	30	30	30	28	30
	29	30	30	31	31	31	30	31	31	31	31	31	31	31	31	31	30	30	30	30	30	30	30	30	29	29	30	30	30	30	31	31	30	31	30	31	30	31	30	31	31	31	31	31	30	30	30	30	30
	29	30	29	30	30	30	30	30	30	30	30	30	30	30	30	30	30	30	30	29	29	30	30	29	29	29	30	30	29	30	30	30	30	30	30	30	30	31	30	31	30	31	30	30	30	29	30	29	29
	30	30	30	31	31	31	31	31	31	31	31	31	31	30	31	31	31	31	31	30	30	31	30	30	29	29	30	30	30	30	31	30	30	31	30	31	31	31	31	31	31	31	30	31	30	30	30	30	30
	30	30	29	29	30	30	30	30	30	30	30	30	30	30	30	30	30	30	30	30	30	30	30	29	29	29	29	29	29	30	30	30	30	30	30	30	30	30	30	30	31	31	30	30	30	29	30	28	29
	30	30	30	30	30	31	30	31	31	30	31	30	30	30	31	30	30	30	30	30	30	30	30	29	29	29	30	29	29	30	30	30	30	30	30	30	30	31	30	31	31	30	30	30	30	29	30	30	30
	30	29	30	30	30	30	30	30	30	30	31	30	30	30	31	30	30	30	30	30	29	30	30	29	29	28	29	29	29	30	30	30	31	30	30	30	30	31	30	31	31	31	30	30	30	30	29	29	29
	30	30	30	30	30	30	30	30	31	30	30	30	30	30	31	30	30	30	30	30	30	30	29	30	29	28	28	29	30	29	30	30	30	30	30	30	30	30	30	31	30	30	30	30	30	30	30	29	29
	30	30	30	30	30	30	30	30	31	31	31	31	30	31	31	30	31	30	31	30	30	31	30	30	29	29	28	30	30	30	30	31	31	31	30	31	31	31	31	31	31	31	30	30	30	30	30	29	29
	30	30	30	30	31	30	31	30	31	31	31	31	30	31	31	31	31	30	31	31	30	30	30	30	29	28	28	30	30	29	31	30	31	31	30	31	31	31	31	31	31	31	30	31	30	30	30	29	30
	30	30	30	30	31	31	31	31	31	31	31	31	31	31	31	31	31	31	31	31	30	31	30	30	29	28	29	30	30	30	31	31	31	31	31	31	31	31	31	31	31	31	31	31	30	30	30	30	30
	30	30	30	30	31	31	31	31	31	31	31	31	31	31	31	31	31	31	31	31	31	31	30	30	29	29	29	30	30	30	31	31	31	31	31	31	31	31	31	31	31	31	31	31	30	31	30	30	30
	30	30	30	30	31	30	30	31	31	31	31	31	31	31	31	31	30	30	31	31	30	30	30	30	30	29	29	30	30	30	31	30	31	31	31	31	30	31	30	31	31	31	30	31	30	30	30	30	30
	30	30	30	30	30	30	30	30	30	30	31	30	30	30	30	30	30	30	30	30	30	30	30	29	29	28	29	30	29	30	30	30	30	30	30	30	30	30	30	30	30	30	30	30	30	29	30	29	28
	30	30	30	30	30	30	31	30	31	31	31	31	30	31	31	30	31	30	31	30	30	30	30	29	29	28	29	30	29	30	30	30	31	31	31	31	31	31	31	31	31	31	30	30	29	30	29	29	30
	30	30	30	30	30	30	30	30	31	30	31	30	30	30	31	30	31	30	30	30	30	30	30	30	29	28	29	29	29	30	30	30	30	30	31	31	30	31	30	30	30	30	30	30	30	29	29	30	30
	30	30	29	30	30	30	30	30	30	30	30	30	30	30	30	30	30	30	30	30	30	30	30	29	29	28	29	30	29	30	31	30	30	30	30	30	30	30	30	30	30	30	30	30	30	30	30	30	30
	30	29	29	29	29	30	30	30	30	30	31	30	29	30	31	30	30	29	31	30	29	30	30	29	29	28	28	29	30	29	30	30	30	30	30	30	30	31	30	31	31	30	30	30	29	29	29	29	29
	30	30	30	30	30	30	30	30	31	30	31	30	30	30	30	30	30	30	30	30	30	30	30	30	29	28	29	30	30	30	30	30	30	30	30	31	31	31	30	31	31	30	30	30	30	30	30	29	29
	30	30	30	30	30	30	30	30	30	31	31	30	30	30	30	30	30	30	30	30	30	30	30	29	29	28	29	30	30	30	30	30	30	30	30	31	30	31	30	31	30	31	30	30	30	30	29	28	30
	30	30	30	30	31	31	31	31	31	31	31	31	31	31	31	31	30	31	31	30	30	31	30	30	30	29	30	30	30	30	31	30	31	30	31	31	30	31	30	31	31	31	31	31	31	30	30	30	30
	30	30	30	30	30	31	30	31	31	30	31	30	30	30	30	30	30	30	30	30	29	30	30	29	29	28	29	29	29	30	30	30	30	30	30	30	30	31	30	31	31	31	30	31	31	30	30	29	29
	29	30	30	30	30	30	30	30	31	31	31	30	30	30	31	30	30	30	31	30	30	30	30	30	30	28	30	30	29	30	30	30	30	30	30	30	30	31	30	31	31	31	31	31	30	30	30	29	30
	30	30	30	30	30	30	30	30	30	30	30	30	30	30	30	30	30	30	30	30	30	30	30	29	29	29	29	29	29	30	30	30	30	30	30	30	30	30	30	30	30	30	30	30	30	29	30	30	29
	30	30	30	30	30	30	30	30	31	31	31	30	30	30	31	30	30	30	30	30	30	30	30	29	29	29	29	30	29	30	30	30	30	30	30	30	30	31	30	31	31	30	30	30	29	29	29	28	29
	30	30	30	30	30	30	30	30	31	31	30	31	30	30	31	30	30	30	30	30	30	30	30	29	29	29	29	30	29	30	30	30	30	30	30	30	30	30	30	31	31	30	30	30	30	30	30	29	30
	29	30	30	30	30	30	30	31	30	30	31	30	30	30	31	30	30	30	31	30	30	30	30	30	29	29	29	30	29	30	30	30	30	30	30	31	30	31	30	31	31	31	31	30	30	30	30	29	30
	30	30	30	30	30	30	30	30	30	31	31	31	30	31	30	30	30	30	30	31	30	30	30	30	28	28	29	30	30	30	30	30	30	31	30	30	30	30	30	31	31	30	30	30	30	30	29	30	30
	30	30	30	30	30	30	30	30	30	31	31	30	31	31	30	31	30	31	31	31	30	30	30	30	29	28	29	30	30	30	31	30	30	30	31	30	31	31	31	31	31	31	31	30	30	30	30	29	29
	30	30	30	30	30	30	30	31	31	31	31	31	31	31	31	31	31	31	31	31	30	31	30	30	29	28	29	30	30	30	31	31	31	31	31	31	31	31	31	31	31	31	31	31	30	30	30	30	30
	30	30	29	30	30	30	31	31	31	31	31	31	31	31	31	31	31	31	31	31	30	30	30	30	29	28	29	30	30	30	31	31	31	31	31	31	31	31	31	31	31	31	31	31	30	30	30	30	30
	30	30	30	30	31	30	31	31	31	31	31	31	31	30	31	31	30	31	31	31	30	31	30	30	29	28	29	30	30	31	31	31	31	31	31	31	30	31	31	31	31	31	31	31	30	31	30	30	31
	29	29	29	30	30	30	30	30	31	31	31	31	31	31	31	31	31	31	31	31	30	31	30	30	29	29	29	30	30	30	30	31	31	31	31	31	31	31	31	31	31	31	31	31	30	30	30	29	30
	30	30	30	30	30	30	30	30	30	30	30	30	30	31	30	30	30	30	30	30	30	30	30	30	29	29	30	30	30	30	30	30	30	30	30	30	30	31	30	31	31	31	30	30	30	30	30	29	30
	30	30	30	30	30	30	31	30	31	31	31	31	31	31	31	30	31	31	31	30	30	30	30	30	29	29	29	30	30	30	31	31	31	31	31	31	31	31	31	31	31	31	31	31	30	30	30	29	30
	29	30	30	30	30	30	30	30	31	30	31	31	30	30	30	30	30	30	30	30	29	30	30	30	29	29	30	29	29	30	30	30	30	31	30	30	30	31	30	31	30	31	30	30	30	30	30	29	30
	29	29	30	30	30	30	30	30	30	31	31	31	31	30	31	30	30	30	30	30	30	30	30	29	29	29	29	30	30	30	30	30	30	30	31	30	31	31	30	30	30	31	31	30	30	30	30	29	30
	29	30	30	30	31	30	31	30	31	31	31	31	30	31	31	30	30	30	30	30	30	30	29	30	29	28	29	30	29	30	30	30	30	30	30	30	30	31	30	31	30	30	30	30	30	30	30	29	30
	30	30	30	30	31	30	30	30	31	30	31	31	30	30	31	30	31	30	31	30	30	30	30	30	30	30	30	30	29	30	30	30	30	31	30	31	31	31	31	31	30	30	30	30	30	30	30	30	30
	30	30	30	30	30	30	30	30	31	30	31	31	30	30	31	30	30	30	30	30	30	30	30	30	29	29	29	29	30	30	30	30	30	31	30	31	31	31	31	31	30	30	30	30	30	30	30	30	30
	30	30	30	30	30	30	30	30	31	30	31	30	30	30	31	30	30	30	30	30	30	30	30	30	29	28	30	29	29	30	30	30	30	30	31	31	30	31	30	31	31	31	31	30	30	29	30	29	29
	29	30	30	30	30	30	31	30	31	30	31	31	30	31	31	30	30	30	30	30	30	30	30	29	29	28	29	29	29	29	30	30	30	31	30	30	30	31	30	31	30	30	29	30	30	30	30	30	30
	30	30	30	30	30	30	30	30	31	31	31	31	30	30	30	30	30	30	30	30	29	30	29	29	28	28	28	29	29	30	30	30	30	30	30	30	30	31	30	31	31	31	30	30	30	29	29	29	30
	28	29	29	29	30	29	30	30	30	30	30	30	30	30	30	29	30	29	29	29	29	29	28	28	27	27	27	29	28	28	30	30	29	30	30	30	30	30	29	30	30	30	29	30	29	30	28	29	29
	28	29	29	29	30	30	30	30	30	30	30	30	30	30	29	30	29	30	30	30	29	30	29	29	29	28	29	29	29	30	30	30	29	30	30	29	29	30	29	30	30	30	30	30	30	30	29	30	30
	29	30	29	30	30	30	30	30	30	30	30	30	30	30	30	30	29	30	30	30	29	30	30	29	29	27	29	29	29	30	30	30	30	30	30	30	30	30	30	31	30	30	30	30	30	30	29	29	29
	28	29	28	29	30	30	29	30	30	30	30	30	30	29	30	29	30	30	30	29	29	29	29	29	28	28	29	29	28	29	29	30	30	30	30	30	30	30	30	30	30	30	30	30	29	28	29	29	29
	29	30	29	29	29	29	29	30	30	30	30	29	30	29	30	30	29	30	29	29	29	29	28	29	28	28	29	29	29	29	30	29	29	30	30	29	29	29	29	30	30	30	30	29	29	29	30	29	29
	29	29	29	30	30	30	29	30	30	30	30	30	30	30	30	30	30	30	30	30	29	30	29	29	28	29	29	30	29	30	30	30	30	30	30	30	30	30	30	30	31	30	30	30	30	30	30	29	30
	29	30	29	30	30	30	30	31	31	31	31	31	30	30	31	31	30	30	31	30	30	30	30	30	29	29	29	30	29	30	30	31	31	31	30	31	31	31	30	31	31	31	31	30	30	30	30	30	30
	28	29	29	29	29	29	29	30	30	30	30	30	30	30	29	30	30	30	30	30	29	30	29	29	28	28	29	29	29	30	30	30	30	30	30	30	30	30	30	30	30	30	30	30	30	30	30	28	30
	30	30	30	30	30	30	30	31	31	31	31	31	31	31	30	31	31	31	30	30	30	30	29	30	29	28	29	30	30	30	30	30	30	30	31	31	30	30	30	31	31	31	30	31	30	30	30	29	30
	30	29	29	30	30	30	30	31	31	31	31	31	31	31	31	31	31	31	31	31	30	31	30	30	29	29	30	30	30	30	31	30	31	31	31	31	31	31	30	31	31	31	31	31	30	30	30	30	30
	30	30	30	30	30	30	31	31	31	31	31	31	31	31	31	31	31	31	31	31	30	30	30	30	29	29	29	30	30	30	31	31	31	31	31	31	31	31	31	31	31	31	31	31	30	30	30	30	31
	30	30	30	30	30	31	30	31	31	31	31	31	31	30	31	30	30	30	31	30	30	30	30	30	29	29	30	31	30	31	31	30	31	30	31	31	30	31	30	31	31	31	31	31	30	30	30	29	30
	30	30	30	30	30	31	30	30	31	31	31	30	30	30	31	31	30	30	31	30	30	30	30	30	29	29	29	30	30	30	30	30	31	30	30	30	30	31	30	31	31	30	31	31	30	30	30	30	30
	30	30	30	30	30	31	30	30	31	31	31	31	30	30	31	30	30	30	30	30	30	30	30	29	29	28	29	30	30	30	30	30	30	30	30	30	30	30	30	30	31	31	31	31	30	30	30	29	30
	30	30	30	30	31	31	31	31	31	31	31	30	31	31	31	31	31	30	31	30	30	30	30	30	30	30	30	30	30	30	31	30	31	31	30	31	31	31	30	31	31	31	30	31	31	30	30	30	30
	30	30	30	30	30	30	30	31	31	31	31	31	30	30	31	30	30	30	30	30	30	30	30	29	30	28	30	30	30	31	30	30	30	30	30	30	30	31	30	30	30	30	31	30	30	30	30	29	30
	30	30	30	30	30	30	30	31	31	30	31	30	30	30	31	30	30	30	31	30	30	31	30	30	29	28	29	30	30	30	30	30	31	31	30	30	30	31	30	31	31	30	30	31	30	30	30	28	29
	29	30	30	30	30	30	30	30	31	31	31	31	30	30	31	30	30	30	30	30	30	30	30	30	29	29	30	30	30	31	31	30	30	30	31	30	30	31	30	31	31	31	31	31	30	30	30	29	30
	30	29	30	30	30	30	30	30	30	30	31	30	30	30	30	30	30	30	30	30	29	30	29	29	29	27	28	29	29	30	30	30	30	30	30	30	30	31	30	31	31	31	30	30	30	29	30	28	29
	30	30	30	30	30	30	30	30	30	30	31	30	30	30	30	30	30	30	30	30	30	30	29	30	29	29	28	29	30	30	30	30	30	30	30	30	30	30	30	30	30	30	30	30	30	30	29	29	29
	29	29	29	29	30	29	30	30	30	30	31	31	30	30	31	31	30	30	30	30	30	30	29	29	29	27	28	30	29	30	30	30	30	30	30	30	30	30	30	31	30	31	30	30	30	30	30	29	30
	29	29	29	29	29	29	30	30	30	30	31	30	30	30	30	31	30	29	30	30	30	30	28	29	28	28	28	29	29	29	30	30	30	30	30	30	30	30	30	30	30	30	30	30	30	29	29	28	28
	30	30	30	30	30	30	30	30	31	31	31	31	30	30	31	31	30	30	31	30	30	30	30	30	30	29	29	30	30	30	30	30	31	31	31	31	31	31	31	31	31	31	31	31	30	30	30	29	30
	29	29	29	29	30	30	30	30	30	30	31	30	30	30	30	30	30	30	30	30	30	30	29	29	29	28	29	30	30	30	30	30	30	30	30	30	30	31	30	31	30	31	30	30	30	29	30	29	29
	29	29	29	30	30	30	30	30	31	31	31	30	30	30	31	30	30	30	31	30	30	30	30	30	29	29	29	30	30	30	30	30	30	30	30	30	30	31	30	31	31	30	30	31	30	30	30	28	30
	30	30	30	30	30	30	30	31	31	31	31	30	30	30	30	30	30	30	30	30	30	30	30	30	30	29	30	30	30	31	30	30	30	30	30	31	30	31	30	31	31	31	31	31	31	30	30	29	30
	29	30	30	30	30	30	31	31	31	31	31	31	31	31	31	31	31	31	31	31	31	30	30	30	29	29	30	30	30	31	31	30	31	30	31	31	31	31	31	31	31	31	31	31	30	30	30	29	30
	30	30	30	30	31	31	31	31	31	31	31	31	31	31	31	31	31	31	31	30	30	31	30	31	30	30	30	31	30	30	31	31	31	31	31	31	31	31	30	31	31	31	31	31	31	31	31	30	30
	30	30	30	30	30	31	30	31	31	31	31	30	30	30	31	30	30	30	31	30	30	30	30	30	30	29	30	30	30	31	30	30	31	30	31	30	31	31	30	31	31	31	31	30	31	30	31	29	30
	29	30	30	30	30	30	31	31	31	31	31	31	30	31	31	31	31	30	31	30	30	30	30	30	29	29	29	30	30	30	31	30	31	31	30	31	31	31	31	31	31	31	31	31	30	30	30	29	30
	30	30	30	30	30	31	31	31	31	31	31	31	31	31	31	30	31	30	31	30	30	30	30	30	29	29	29	30	30	30	31	30	30	31	31	31	31	31	30	31	31	31	30	30	30	30	30	30	30
	29	30	29	29	30	30	30	30	31	31	31	30	30	31	31	30	30	30	31	30	30	30	30	30	30	29	29	30	30	30	31	30	31	30	30	30	31	31	30	30	31	31	31	31	30	30	30	29	30
	30	30	30	30	30	30	31	30	31	31	31	31	31	31	31	30	31	30	31	31	30	30	30	30	29	28	29	30	30	30	31	30	30	31	30	31	31	31	30	31	31	30	30	31	30	30	30	30	30
	30	30	30	30	30	30	31	31	31	31	31	31	31	31	31	31	31	30	31	30	30	31	30	30	29	29	29	30	30	30	31	30	31	31	31	31	31	31	31	31	31	31	31	30	30	30	30	29	30
	29	30	30	30	30	30	30	30	31	31	31	31	30	31	31	30	31	30	31	30	30	30	30	30	29	29	29	30	30	30	30	30	30	30	30	31	30	31	30	31	31	31	30	30	30	30	30	30	30
	29	29	29	29	30	30	30	30	31	31	31	31	30	31	30	30	30	30	30	30	29	30	30	29	29	28	29	30	30	30	30	30	30	30	31	31	31	31	31	31	31	31	31	30	30	30	30	29	30
	29	30	29	30	30	30	30	30	31	30	31	31	30	30	30	30	30	30	31	30	30	30	30	30	29	29	29	30	30	30	30	30	31	30	30	30	31	31	30	30	30	31	30	30	30	30	30	30	30
	28	29	28	29	30	30	30	30	31	31	30	30	30	30	30	30	30	30	31	30	29	30	29	30	28	28	29	30	30	30	30	30	30	30	30	30	30	30	30	31	31	31	30	30	30	30	30	29	30
	29	30	29	29	30	30	30	30	31	30	31	31	30	31	30	30	30	30	30	30	30	30	29	29	28	27	28	29	29	30	30	30	30	31	30	31	30	30	30	31	30	31	30	30	30	30	30	30	30
	28	29	29	30	30	30	30	30	31	31	31	31	30	31	31	31	31	30	31	30	30	30	29	30	28	28	29	30	30	30	31	31	31	31	31	31	31	31	30	31	31	31	30	31	30	30	30	29	30
	30	30	30	30	31	30	31	31	31	31	31	31	30	31	31	31	31	31	31	31	30	31	30	31	30	30	30	30	31	30	31	31	31	31	31	31	31	31	31	31	31	31	31	31	31	31	30	30	30
	29	30	30	30	30	30	30	30	31	31	31	31	31	31	31	31	31	30	31	30	30	31	30	30	29	28	30	30	30	30	31	31	31	31	31	31	31	31	31	31	31	31	31	31	30	30	30	30	30
	30	30	30	30	30	30	30	30	31	31	31	31	30	31	31	31	31	30	31	31	30	30	30	30	29	28	29	30	30	30	31	31	31	31	31	31	31	31	31	31	31	31	31	31	30	30	30	30	30
	30	30	30	30	31	31	31	31	31	31	31	31	31	31	31	31	31	31	31	31	30	31	30	30	29	29	30	30	30	30	31	30	31	31	31	31	31	31	30	31	31	31	30	31	30	31	30	30	30
	29	29	29	30	30	30	30	30	31	31	31	31	30	31	31	31	30	30	31	30	29	30	30	29	29	28	29	30	29	30	30	30	31	31	31	31	30	31	31	31	31	31	31	31	30	30	30	29	30
	30	30	30	30	31	30	30	31	31	31	31	31	31	31	31	30	30	30	31	30	30	30	30	30	29	29	30	30	30	30	31	30	31	30	31	31	31	31	30	31	31	31	30	30	30	30	30	29	30
	30	30	30	30	30	30	30	31	31	31	31	31	31	31	31	31	31	30	31	30	30	30	30	30	29	28	29	30	30	30	31	30	31	31	31	31	30	31	30	31	31	31	31	31	30	30	30	29	30
	30	30	30	30	31	30	31	31	31	31	31	31	31	31	31	31	31	30	31	31	30	30	30	30	30	29	29	30	30	30	30	30	30	30	30	31	31	31	31	31	31	30	30	30	30	30	30	29	30
	29	29	30	30	30	30	30	30	31	31	31	30	30	30	31	31	31	30	31	30	30	30	30	30	29	29	29	30	30	30	30	30	31	30	31	31	30	31	30	31	31	31	31	31	30	30	30	29	30
	29	30	30	30	30	30	30	30	31	31	31	30	30	31	30	30	30	30	30	30	29	30	29	29	28	28	28	29	29	29	30	29	30	30	30	31	30	31	30	30	30	30	30	30	30	30	30	28	29
	30	30	30	30	30	31	31	31	31	31	31	31	30	31	31	31	31	30	31	31	31	31	30	30	30	29	29	30	30	30	31	30	31	31	31	31	31	31	31	31	31	31	30	31	30	30	30	30	30
	29	30	29	30	30	30	30	30	31	31	31	30	30	30	31	30	30	30	30	30	30	30	30	29	29	28	29	30	29	30	30	30	30	30	30	30	30	31	30	30	30	31	30	30	30	30	30	28	29
	30	30	30	30	31	30	31	30	31	31	31	31	30	31	31	31	31	30	31	31	31	31	30	30	30	30	29	30	30	30	30	30	31	31	31	31	31	31	31	31	31	31	30	31	30	30	30	29	30
	30	30	30	30	30	31	31	30	31	31	31	31	30	31	31	31	30	30	31	30	30	30	30	30	29	29	29	30	30	30	30	30	31	30	31	31	31	31	31	31	31	31	31	31	30	30	30	30	30
	30	31	31	31	31	31	31	31	31	31	31	31	31	31	31	31	31	31	31	31	31	31	30	30	29	30	30	30	30	31	31	31	31	31	31	31	31	31	31	31	31	31	31	31	31	31	31	30	31
	31	31	31	31	31	31	31	31	31	31	31	31	31	31	31	31	31	31	31	31	31	31	31	31	30	29	30	31	31	31	31	31	31	31	31	31	31	31	31	31	31	31	31	31	31	31	31	30	31
	31	31	31	31	31	31	31	31	31	31	31	31	31	31	31	31	31	31	31	31	31	31	31	31	30	30	30	31	31	31	31	31	31	31	31	31	31	31	31	31	31	31	31	31	31	31	31	30	31
	31	31	31	31	31	31	31	31	31	31	31	31	31	31	31	31	31	31	31	31	31	31	31	31	31	30	30	31	31	31	31	31	31	31	31	31	31	31	31	31	31	31	31	31	31	31	31	31	31
	31	31	31	31	31	31	31	31	31	31	31	31	31	31	31	31	31	31	31	31	31	31	31	31	31	31	31	31	31	31	31	31	31	31	31	31	31	31	31	31	31	31	31	31	31	31	31	31	31
	31	31	31	31	31	31	31	31	31	31	31	31	31	31	31	31	31	31	31	31	31	31	31	31	31	31	31	31	31	31	31	31	31	31	31	31	31	31	31	31	31	31	31	31	31	31	31	31	31
	31	31	31	31	31	31	31	31	31	31	31	31	31	31	31	31	31	31	31	31	31	31	31	31	31	31	31	31	31	31	31	31	31	31	31	31	31	31	31	31	31	31	31	31	31	31	31	31	31
	31	31	31	31	31	31	31	31	31	31	31	31	31	31	31	31	31	31	31	31	31	31	31	31	31	31	31	31	31	31	31	31	31	31	31	31	31	31	31	31	31	31	31	31	31	31	31	31	31
	31	31	31	31	31	31	31	31	31	31	31	31	31	31	31	31	31	31	31	31	31	31	31	31	31	31	31	31	31	31	31	31	31	31	31	31	31	31	31	31	31	31	31	31	31	31	31	31	31
	31	31	31	31	31	31	31	31	31	31	31	31	31	31	31	31	31	31	31	31	31	31	31	31	31	31	31	31	31	31	31	31	31	31	31	31	31	31	31	31	31	31	31	31	31	31	31	31	31
	31	31	31	31	31	31	31	31	31	31	31	31	31	31	31	31	31	31	31	31	31	31	31	31	31	30	31	31	31	31	31	31	31	31	31	31	31	31	31	31	31	31	31	31	31	31	31	31	31
	31	31	31	31	31	31	31	31	31	31	31	31	31	31	31	31	31	31	31	31	31	31	31	31	31	31	31	31	31	31	31	31	31	31	31	31	31	31	31	31	31	31	31	31	31	31	31	31	31
	31	31	31	31	31	31	31	31	31	31	31	31	31	31	31	31	31	31	31	31	31	31	31	31	31	31	31	31	31	31	31	31	31	31	31	31	31	31	31	31	31	31	31	31	31	31	31	31	31
	31	31	31	31	31	31	31	31	31	31	31	31	31	31	31	31	31	31	31	31	31	31	31	31	31	31	31	31	31	31	31	31	31	31	31	31	31	31	31	31	31	31	31	31	31	31	31	31	31
	31	31	31	31	31	31	31	31	31	31	31	31	31	31	31	31	31	31	31	31	31	31	31	31	31	30	31	31	31	31	31	31	31	31	31	31	31	31	31	31	31	31	31	31	31	31	31	31	31
	31	31	31	31	31	31	31	31	31	31	31	31	31	31	31	31	31	31	31	31	31	31	31	31	31	31	30	31	31	31	31	31	31	31	31	31	31	31	31	31	31	31	31	31	31	31	31	31	31
	31	31	31	31	31	31	31	31	31	31	31	31	31	31	31	31	31	31	31	31	31	31	31	31	31	30	31	31	31	31	31	31	31	31	31	31	31	31	31	31	31	31	31	31	31	31	31	31	31
	31	31	31	31	31	31	31	30	31	31	31	31	31	31	31	31	31	31	31	31	31	30	31	31	31	30	30	31	30	31	31	31	31	31	31	31	31	31	31	31	31	31	31	31	31	31	31	30	31
	31	31	31	31	31	31	31	31	31	31	31	31	31	31	31	31	31	31	31	31	31	31	31	31	31	30	30	31	31	31	31	31	31	31	31	31	31	31	31	31	31	31	31	31	31	31	31	31	31
	31	31	31	31	31	31	31	31	31	31	31	31	31	31	31	31	31	31	31	31	31	31	31	31	31	31	31	31	31	31	31	31	31	31	31	31	31	31	31	31	31	31	31	31	31	31	31	30	31
	30	30	30	30	30	30	30	30	31	31	31	31	30	31	31	31	30	30	31	31	30	30	30	30	30	29	29	30	30	30	30	30	31	30	30	31	31	31	30	31	31	31	31	30	31	30	30	29	30
	30	30	30	30	30	30	30	30	30	31	31	30	30	30	30	30	30	30	30	30	30	30	30	30	30	29	29	30	30	30	29	30	30	30	30	30	30	30	30	30	30	30	30	30	30	29	30	29	30
	30	30	31	30	30	30	30	30	30	31	31	30	30	30	30	30	30	30	30	30	30	30	31	30	30	29	29	30	30	30	30	29	30	30	30	30	30	30	30	30	30	30	30	30	30	30	30	29	30
	30	30	31	30	31	30	31	30	31	31	31	31	30	31	31	30	30	30	31	30	30	31	30	30	30	29	30	30	30	30	30	30	30	30	30	31	31	31	30	31	30	31	30	30	30	30	30	27	30
	30	30	30	30	30	30	30	30	30	30	30	30	29	30	30	29	30	29	30	30	30	30	30	30	30	29	29	30	29	30	29	29	30	30	30	30	30	30	30	30	30	30	30	30	30	29	30	29	30
	30	30	30	30	30	30	30	30	30	30	31	30	30	30	30	30	30	31	31	31	30	30	30	30	30	29	29	30	30	30	30	30	30	30	30	31	30	30	30	31	31	30	30	30	30	30	30	29	30
	30	30	31	30	31	31	31	30	31	31	31	31	30	30	31	31	30	30	31	30	30	30	30	30	30	29	29	30	30	30	30	30	31	31	31	31	31	31	31	31	31	31	30	31	30	30	30	29	30
	30	30	30	29	30	30	30	30	30	30	30	30	30	30	30	30	30	30	30	30	29	30	31	30	30	29	29	29	29	30	29	30	30	30	30	30	30	30	30	30	30	30	30	30	30	29	30	29	29
	30	30	30	30	30	30	30	30	31	30	31	31	30	30	30	30	30	30	31	30	30	30	30	30	30	28	29	30	30	30	30	30	30	30	30	31	30	30	30	30	30	30	31	30	30	30	30	29	30
	30	30	31	30	30	30	30	31	31	31	31	31	31	31	30	30	31	30	31	30	30	30	30	30	29	29	28	30	30	30	30	30	31	31	30	31	31	31	31	31	31	31	30	30	30	30	30	29	30
	29	30	30	29	30	29	30	30	30	30	31	30	30	30	31	30	30	30	30	30	29	30	30	30	30	28	29	30	29	30	30	30	31	30	30	31	31	30	30	30	30	30	30	30	30	30	30	28	29
	29	29	29	29	30	30	30	30	30	30	30	30	30	30	30	30	30	30	30	30	30	29	30	30	30	29	29	30	29	30	29	30	30	30	30	30	30	30	30	30	30	30	30	30	30	29	30	29	30
	30	30	30	30	30	30	30	30	31	31	31	31	31	31	31	30	31	31	31	31	30	30	30	30	30	29	29	30	30	30	30	30	31	30	31	31	31	31	31	31	31	31	31	31	31	30	30	30	31
	30	30	30	30	31	30	30	31	31	31	31	31	31	31	30	31	30	31	31	31	30	30	30	30	30	30	30	30	30	30	30	30	30	30	30	31	31	31	31	31	30	31	30	31	30	30	30	30	30
	31	30	30	30	30	30	30	31	31	31	31	31	30	30	31	30	31	30	31	30	30	30	30	30	30	30	30	31	30	30	30	30	31	30	31	31	31	31	31	31	31	31	31	31	31	30	30	30	30
	30	30	30	30	30	30	30	30	31	31	31	31	30	31	31	30	30	30	31	30	31	30	30	30	30	30	30	31	30	31	30	30	31	30	31	31	31	31	31	31	30	31	31	31	30	30	31	30	31
	31	31	31	31	31	31	31	31	31	31	31	31	31	31	31	31	31	31	31	31	31	31	30	30	30	30	30	31	30	31	31	30	31	31	30	31	31	31	31	31	31	31	31	31	31	31	31	31	31
	31	31	31	31	30	31	31	31	31	31	31	31	31	31	31	30	30	30	31	31	30	31	30	30	30	30	29	31	30	30	30	30	30	30	30	31	31	31	31	31	31	30	31	31	31	31	30	30	31
	31	30	30	30	30	31	30	31	31	31	31	31	31	31	31	30	31	31	31	31	31	31	30	31	30	30	30	31	31	31	31	30	31	30	31	31	31	31	31	31	31	31	31	31	31	31	31	30	31
	31	31	31	31	31	31	31	31	31	31	31	31	31	31	31	31	31	31	31	31	31	31	31	31	30	30	30	31	31	31	31	30	31	31	31	31	31	31	31	31	31	31	31	31	31	31	31	31	31
	31	31	31	31	31	31	31	31	31	31	31	31	31	31	31	31	31	31	31	31	31	31	31	31	31	30	30	31	31	31	31	31	31	31	31	31	31	31	31	31	31	31	31	31	31	31	31	31	31
	31	31	31	31	31	31	31	31	31	31	31	31	31	31	31	31	31	31	31	31	31	31	31	31	31	30	31	31	31	31	31	31	31	31	31	31	31	31	31	31	31	31	31	31	31	31	31	31	31
	31	31	31	31	31	31	31	31	31	31	31	31	31	31	31	31	31	31	31	31	31	31	31	31	31	30	31	31	31	31	31	31	31	31	31	31	31	31	31	31	31	31	31	31	31	31	31	31	31
	31	31	31	31	31	31	31	31	31	31	31	31	31	31	31	31	31	31	31	31	31	31	31	31	31	30	31	31	31	31	31	31	31	31	31	31	31	31	31	31	31	31	31	31	31	31	31	31	31
	31	31	31	31	31	31	31	31	31	31	31	31	31	31	31	31	31	31	31	31	31	31	31	31	31	31	31	31	31	31	31	31	31	31	31	31	31	31	31	31	31	31	31	31	31	31	31	31	31
	31	31	31	31	31	31	31	31	31	31	31	31	31	31	31	31	31	31	31	31	31	31	31	31	31	30	31	31	31	31	31	31	31	31	31	31	31	31	31	31	31	31	31	31	31	31	31	31	31
	31	31	31	31	31	31	31	31	31	31	31	31	31	31	31	31	31	31	31	31	31	31	31	31	31	31	31	31	31	31	31	31	31	31	31	31	31	31	31	31	31	31	31	31	31	31	31	31	31
	31	31	31	31	31	31	31	31	31	31	31	31	31	31	31	31	31	31	31	31	31	31	31	31	31	31	30	31	31	31	31	31	31	31	31	31	31	31	31	31	31	31	31	31	31	31	31	31	31
	31	31	30	31	31	31	31	31	31	31	31	31	31	31	31	31	31	31	31	31	31	31	31	31	31	30	30	31	31	31	31	31	31	31	31	31	31	31	31	31	31	31	31	31	31	31	31	31	31
	31	31	31	31	31	31	31	31	31	31	31	31	31	31	31	31	31	31	31	31	31	31	31	31	31	31	30	31	31	31	31	31	31	31	31	31	31	31	31	31	31	31	31	31	31	31	31	31	31
	31	31	31	31	31	31	31	31	31	31	31	31	31	31	31	31	31	31	31	31	31	31	31	31	31	31	30	31	31	31	31	31	31	31	31	31	31	31	31	31	31	31	31	31	31	31	31	31	31
	31	30	30	30	30	30	30	31	31	31	31	31	31	31	31	31	31	31	31	31	31	31	31	31	31	30	30	31	31	31	31	31	31	31	31	31	31	31	31	31	31	31	31	31	31	31	31	31	31
	31	31	30	30	30	30	31	31	31	31	31	31	31	31	31	31	31	31	31	31	31	31	30	31	30	30	30	31	31	31	31	31	31	31	31	31	31	31	31	31	31	31	31	31	31	31	31	31	31
	31	31	31	31	31	31	31	31	31	31	31	31	31	31	31	31	31	31	31	31	31	31	31	31	31	30	30	31	31	31	31	31	31	31	31	31	31	31	31	31	31	31	31	31	31	31	31	31	31
	31	31	30	30	31	31	31	31	31	31	31	31	31	31	31	31	31	31	31	31	30	30	30	30	30	30	30	31	30	30	31	30	31	31	31	31	31	31	31	31	31	31	31	31	30	31	31	30	31
	31	31	30	31	30	31	31	31	31	31	31	31	31	31	31	31	31	31	31	31	31	30	30	30	30	30	29	31	30	30	31	30	31	31	31	31	31	31	31	31	31	31	30	31	31	31	31	31	31
	30	31	30	30	30	30	30	31	31	31	31	31	31	31	31	31	31	31	31	31	31	31	30	31	30	30	29	31	31	30	30	30	31	31	31	31	31	31	31	31	31	30	31	30	31	31	31	31	31
	31	31	30	31	31	31	31	31	31	31	31	31	31	31	31	31	31	31	31	31	30	30	30	30	30	29	29	30	30	30	30	29	31	30	31	31	31	31	31	31	30	30	30	30	30	30	31	31	31
	31	31	30	31	31	31	31	31	31	31	31	31	31	31	31	30	31	30	31	31	30	30	30	30	30	29	29	30	30	30	30	30	31	30	30	31	31	31	30	30	31	30	30	30	30	31	31	31	31
	30	30	30	30	31	31	30	30	31	31	31	31	30	31	31	30	30	30	30	30	30	30	30	30	30	29	28	30	30	30	30	29	30	30	30	30	30	31	30	30	30	29	30	30	30	30	30	31	31
	31	31	31	31	31	31	31	31	31	31	31	31	31	31	31	31	31	31	30	30	30	29	30	30	30	30	30	30	30	29	30	29	30	30	30	31	31	31	31	31	30	30	30	30	30	31	31	31	31
	30	31	30	31	31	31	31	31	31	31	30	31	31	31	31	30	31	30	31	30	30	30	30	30	30	29	29	30	30	29	30	30	31	30	30	31	31	31	31	30	30	30	30	30	31	31	30	31	31
	31	31	30	31	31	31	31	31	31	31	31	31	31	31	31	30	30	31	31	30	30	30	30	30	30	30	29	31	30	30	30	30	31	30	30	31	31	31	31	30	31	30	30	30	31	30	31	31	31
	31	31	30	31	31	31	31	31	31	31	31	31	31	31	31	30	31	31	31	30	30	30	30	30	30	30	30	30	30	29	29	30	30	30	30	31	31	31	30	31	30	30	30	30	30	30	31	31	31
	31	31	30	31	31	31	31	31	31	31	31	31	31	31	31	30	30	30	31	30	30	29	30	30	30	30	29	30	30	30	30	30	30	30	30	31	31	31	30	31	31	30	30	30	30	30	31	31	31
	31	31	30	31	31	31	31	31	31	31	31	31	31	31	31	31	31	31	31	30	30	29	30	30	30	30	30	30	30	30	30	30	31	30	31	31	31	31	31	31	31	30	30	30	30	30	31	31	31
	30	31	30	30	30	30	31	31	31	31	31	31	30	31	31	30	31	30	31	31	30	30	30	30	30	30	30	30	30	31	30	30	30	30	30	31	31	31	31	30	30	30	30	30	30	30	31	30	31
	31	31	30	31	31	31	31	31	31	31	31	31	31	31	31	31	31	31	31	30	30	30	30	30	30	30	30	30	30	31	30	30	31	31	31	31	31	31	31	31	31	30	31	31	31	31	31	31	31
	31	31	30	31	31	31	31	31	31	31	31	31	31	31	31	31	31	31	31	31	30	30	30	30	30	30	31	31	30	31	31	30	31	31	31	31	31	31	31	31	31	31	31	31	31	31	31	31	31
	31	31	30	31	31	31	31	31	31	31	31	31	31	31	31	31	31	31	30	30	30	30	30	30	29	29	30	30	30	30	30	30	31	31	31	31	31	31	31	31	31	31	31	31	31	31	31	30	31
	31	31	30	31	31	31	31	31	31	31	31	31	31	31	31	31	31	31	31	30	30	31	30	30	30	30	30	31	30	31	31	31	31	31	31	31	31	31	31	31	31	31	31	31	31	31	31	31	31
	31	31	30	31	31	30	31	31	31	31	31	31	30	31	31	31	31	30	31	30	30	30	30	30	30	29	30	30	30	31	30	31	31	31	31	31	31	31	31	31	31	31	31	31	31	31	31	30	31
	30	30	30	31	31	31	31	31	31	31	31	31	31	31	31	31	31	31	31	31	30	31	30	30	30	30	30	31	30	31	30	31	31	31	31	31	31	31	31	31	31	31	31	31	31	31	31	31	31
	31	31	30	31	31	31	31	31	31	31	31	31	30	31	31	31	31	30	31	31	30	31	30	30	30	30	30	31	30	31	31	31	31	31	31	31	31	31	31	31	31	31	31	31	31	31	31	31	31
	31	31	30	31	31	31	31	31	31	31	31	31	31	31	31	31	31	31	31	31	30	30	30	30	30	30	29	31	30	31	30	31	31	31	31	31	31	31	31	31	31	31	31	31	31	31	31	31	31
	30	30	30	31	31	31	31	31	31	31	31	31	30	31	31	31	31	31	31	31	31	31	31	30	30	30	30	31	30	31	31	31	31	31	31	31	31	31	31	31	31	31	31	31	31	31	31	31	31
	31	31	30	31	31	31	31	31	31	31	31	31	31	31	31	31	31	31	31	31	30	31	30	30	30	30	30	31	31	31	31	31	31	31	31	31	31	31	31	31	31	31	31	31	31	31	31	31	31
	30	31	30	31	31	31	31	31	31	31	31	31	31	31	31	31	31	31	31	31	30	31	30	30	30	29	30	30	30	30	30	31	31	31	31	31	31	31	31	31	31	31	31	31	31	31	31	30	31
	30	30	30	31	31	31	31	31	31	31	31	31	31	31	31	31	31	31	31	31	31	31	31	30	30	30	30	31	31	31	31	31	31	31	31	31	31	31	31	31	31	31	31	31	31	31	31	31	31
	30	31	30	31	31	31	31	31	31	31	31	31	31	31	31	31	31	31	31	31	30	31	30	30	30	30	30	31	30	31	30	31	31	31	31	31	31	31	31	31	31	31	31	31	31	31	31	30	31
	30	31	30	31	31	31	31	31	31	31	31	31	31	31	31	31	31	31	31	31	30	31	30	30	30	30	30	30	31	31	31	31	31	31	31	31	31	31	31	31	31	31	31	31	31	31	31	31	31
	30	31	30	31	31	31	31	31	31	31	31	31	30	31	31	31	31	31	31	31	30	31	30	30	30	30	29	30	30	30	30	31	31	31	31	31	31	31	31	31	31	31	31	31	31	31	31	30	31
	30	30	30	31	31	31	31	31	31	31	31	31	31	31	31	31	31	31	31	31	30	31	30	30	30	29	29	30	30	31	30	31	31	31	31	31	31	31	31	31	31	31	31	31	30	31	31	30	31
	30	31	30	31	31	31	31	31	31	31	31	31	30	31	31	31	31	30	31	31	30	31	30	30	30	29	30	31	30	31	31	31	31	31	31	31	31	31	31	31	31	31	31	31	31	31	31	30	30
	30	31	31	31	31	31	31	31	31	31	31	31	31	31	31	31	31	30	31	31	30	31	30	30	30	29	29	30	30	30	30	31	31	31	31	31	31	31	31	31	31	31	31	31	30	31	30	30	31
	30	30	30	31	30	31	31	31	31	31	31	31	31	31	31	31	31	31	31	31	31	31	30	30	30	29	28	30	30	30	30	31	31	31	31	31	31	31	31	31	31	31	31	31	31	31	30	30	30
	29	31	30	31	31	31	31	31	31	30	31	31	30	31	31	30	31	30	31	30	30	30	30	30	30	29	29	30	30	30	30	31	31	31	31	31	30	31	31	31	31	31	31	31	30	31	30	30	30
	30	30	30	30	30	30	30	31	31	30	31	31	31	31	31	31	31	31	31	30	30	30	30	30	29	26	29	30	30	30	31	31	31	31	31	31	31	31	31	31	31	31	30	30	30	30	30	30	30
	29	30	29	30	30	30	30	30	31	30	31	31	30	30	31	30	30	30	30	30	30	30	30	29	29	28	28	29	29	30	30	30	30	31	31	30	30	31	30	31	30	31	31	30	30	30	30	30	30
	29	30	29	30	30	30	30	31	30	30	31	30	30	30	30	30	30	30	31	30	30	30	30	29	29	26	29	29	30	30	30	30	31	31	31	30	30	31	30	31	31	31	30	30	30	30	30	30	30
	29	30	30	30	30	30	29	30	30	30	31	30	30	30	30	30	30	30	30	30	30	30	30	30	29	27	29	30	30	30	30	30	31	30	30	30	30	30	30	31	30	30	30	30	30	30	30	30	30
	29	30	30	30	30	31	31	30	31	30	30	31	30	31	30	30	30	30	31	30	30	30	30	30	29	27	29	30	30	30	30	30	30	31	30	30	30	31	30	31	31	30	30	30	30	30	30	30	30
	29	29	29	30	29	30	29	30	30	30	30	30	30	30	30	30	30	30	30	30	30	30	30	29	29	27	28	30	30	30	30	30	30	31	30	30	30	31	30	31	30	31	30	30	30	30	30	30	30
	28	29	29	30	30	30	30	30	30	29	30	30	30	30	30	30	30	30	30	30	30	30	29	29	28	26	28	29	29	30	30	30	30	30	30	30	30	30	30	30	30	30	30	30	29	30	30	29	29
	29	30	30	30	30	30	30	30	30	30	30	30	30	30	30	30	30	30	30	30	29	30	30	29	29	27	29	29	30	30	30	30	30	30	30	30	30	30	30	31	30	30	30	30	29	30	30	28	29
	28	29	29	30	30	30	30	30	30	30	30	30	30	30	30	30	30	30	31	30	30	30	30	29	29	26	28	29	30	30	30	30	30	31	30	31	30	30	30	31	30	30	30	30	30	30	30	29	30
	29	29	29	30	30	30	30	30	30	30	30	30	30	30	30	30	30	30	30	30	29	30	30	29	29	27	28	29	30	30	30	30	30	30	30	30	30	30	30	30	30	30	30	30	29	30	30	29	29
	29	28	28	29	29	29	29	29	30	29	30	30	30	30	29	30	30	30	30	30	30	30	29	29	27	25	27	29	29	29	30	30	30	30	30	30	30	30	30	30	30	30	30	30	29	30	29	27	28
	27	29	28	29	30	30	30	30	30	29	30	30	30	30	30	29	30	30	30	30	29	30	30	29	28	26	26	28	29	30	30	30	30	31	29	30	30	30	30	30	30	30	30	30	29	30	29	27	28
	28	29	28	29	29	29	29	30	30	29	30	30	30	30	29	30	30	30	30	30	29	30	29	28	28	24	26	28	28	29	30	30	30	30	30	30	30	30	30	31	30	30	30	30	29	30	29	27	29
	27	29	27	30	29	30	30	30	30	30	30	30	30	30	30	30	30	30	30	30	28	30	30	27	28	24	26	28	28	30	30	30	30	30	30	30	30	30	30	30	30	30	30	30	30	29	29	26	28
	28	29	28	30	30	30	30	30	30	29	30	30	29	30	30	30	30	30	30	30	28	29	29	28	27	25	27	28	27	29	29	30	30	30	30	30	30	30	30	31	30	30	30	30	29	28	29	27	29
	29	29	28	30	30	30	30	30	30	30	30	30	29	30	30	30	30	29	30	30	28	30	29	27	28	25	27	28	28	29	29	30	30	30	30	30	30	30	30	30	30	30	30	30	29	29	29	26	28
	29	30	28	30	30	30	30	30	31	30	31	30	29	30	30	30	30	29	31	30	27	30	29	27	28	25	28	28	27	29	29	30	30	30	30	30	30	31	30	31	31	31	30	30	30	28	30	26	29
	29	29	28	29	29	29	30	30	30	30	30	30	28	30	30	30	30	29	30	30	27	30	28	27	28	25	27	28	27	29	28	30	30	31	30	30	30	30	30	30	30	30	30	30	29	29	29	26	28
	28	29	27	30	30	30	30	30	31	30	30	30	26	30	30	30	30	28	30	29	27	30	29	27	28	24	26	28	26	29	28	30	30	30	30	30	30	31	30	31	30	30	30	30	29	28	29	24	28
	29	29	28	29	29	29	29	29	30	29	30	30	27	30	30	29	30	28	30	29	27	29	29	27	28	26	26	27	27	29	28	30	29	30	30	30	30	30	30	30	30	30	29	29	30	28	29	25	27
	29	29	27	30	30	30	30	30	30	30	30	30	26	30	30	29	30	27	30	29	27	29	28	25	25	22	26	26	25	28	27	30	29	30	30	30	30	30	30	30	30	30	29	29	29	27	29	22	26
	28	28	27	29	29	30	29	29	30	30	30	30	27	29	30	29	30	28	30	29	28	29	28	28	27	25	27	27	27	29	27	29	29	30	30	30	30	30	30	30	30	30	29	29	29	28	29	25	27
	28	29	27	29	29	30	29	29	30	29	30	30	27	30	30	29	30	28	30	29	27	29	28	27	27	23	26	27	26	28	28	30	29	30	30	30	30	30	30	30	30	30	29	30	30	27	29	22	25
	28	28	27	29	29	29	29	29	29	29	29	30	26	29	29	29	29	27	30	29	27	29	28	27	26	25	27	27	27	28	28	29	29	30	29	30	30	30	30	30	30	29	29	29	29	28	29	23	25
	28	29	27	30	30	30	30	29	30	29	29	30	27	29	30	29	29	28	30	29	26	29	28	25	26	23	26	25	26	29	28	29	29	30	30	30	30	30	30	30	30	30	29	29	29	27	28	21	25
	28	28	26	28	28	29	28	28	29	29	29	29	27	29	29	28	29	27	29	28	27	28	28	27	27	25	25	27	26	29	27	29	29	30	29	30	30	30	30	30	30	29	29	29	29	27	28	24	25
	28	29	27	29	29	30	30	29	30	29	29	30	28	30	30	28	30	29	30	29	27	29	28	26	27	25	26	26	26	28	28	29	29	30	29	30	30	30	30	30	30	30	29	29	29	27	28	21	24
	28	28	26	28	28	28	28	28	29	28	28	29	26	29	29	28	29	27	29	28	26	28	27	26	26	25	25	26	26	28	27	28	28	30	29	30	29	29	30	29	29	29	29	29	29	27	28	24	25
	28	28	27	30	29	30	30	29	30	29	29	30	27	30	30	28	29	29	30	29	28	29	28	27	28	25	26	27	27	28	29	30	30	30	30	30	30	30	30	30	30	30	30	29	29	28	28	23	25
	28	28	27	29	29	29	29	29	29	28	29	29	27	29	29	29	29	28	30	28	27	29	28	27	27	26	27	27	27	29	27	29	29	30	29	30	29	30	30	30	29	30	29	29	29	27	28	24	25
	28	27	26	29	29	29	30	29	30	29	30	30	27	30	30	29	30	28	30	29	27	29	29	27	28	27	27	27	28	29	28	30	30	30	30	30	30	30	30	30	30	30	30	30	30	28	29	24	25
	28	27	27	29	29	29	29	30	30	28	30	29	27	28	30	29	29	28	30	30	28	29	29	28	28	27	27	28	28	29	28	30	30	30	30	30	29	30	30	30	31	30	30	29	30	27	29	25	25
	28	28	28	29	29	30	30	29	30	29	30	30	28	30	30	29	30	29	30	30	28	29	30	28	29	28	29	28	29	30	29	30	30	30	30	30	30	30	30	30	30	30	30	30	30	29	29	26	26
	28	27	27	28	29	29	29	29	30	28	30	29	27	28	29	29	30	28	30	29	29	29	29	28	28	28	28	28	28	29	28	30	29	30	30	30	30	30	30	30	30	30	30	30	30	28	29	26	26
	27	27	27	29	28	29	30	29	30	28	30	29	28	30	30	29	30	29	30	30	29	30	30	28	29	27	27	28	28	29	29	30	30	30	30	30	30	30	30	30	30	30	30	29	30	28	29	25	25
	28	27	27	28	28	29	29	29	30	28	29	29	28	28	29	29	29	29	30	29	28	29	29	27	28	28	29	28	28	29	29	30	29	30	30	30	29	30	30	30	30	30	30	29	30	28	29	26	26
	27	27	27	28	28	28	29	28	30	27	30	29	27	29	29	29	30	29	30	30	29	30	29	28	29	29	28	28	29	30	29	30	30	30	30	30	30	30	30	30	30	30	30	29	30	29	29	26	26
	28	27	27	29	29	29	29	29	30	28	30	29	29	29	29	29	29	30	30	30	29	30	29	28	29	28	29	29	29	30	29	30	30	30	30	30	30	30	30	30	30	30	30	30	30	28	29	27	27
	28	26	27	28	28	29	29	29	30	27	30	29	28	29	29	29	29	29	30	30	29	30	29	29	28	28	29	29	29	30	29	30	29	30	30	30	29	29	30	30	30	30	30	30	30	28	30	27	26
	28	27	27	29	28	29	29	30	30	28	30	28	28	28	29	29	29	29	30	30	30	30	29	29	29	28	29	29	30	30	29	30	30	30	30	30	29	30	30	30	31	30	31	30	30	28	30	27	27
	29	27	28	29	28	29	30	29	30	28	30	29	28	29	29	29	29	30	30	30	29	30	29	29	28	29	29	29	30	30	30	30	30	30	30	30	30	30	30	30	30	30	30	30	30	29	30	28	27
	29	27	27	29	28	28	29	30	30	28	29	28	27	28	28	29	28	29	30	30	30	30	29	29	29	28	29	29	30	30	29	30	29	30	29	29	29	29	29	30	30	30	30	30	30	29	30	29	28
	28	27	28	29	29	29	30	29	30	28	30	29	27	26	29	29	29	29	30	30	30	30	30	29	29	29	29	28	30	30	29	30	29	30	29	29	29	30	30	30	30	30	30	29	30	29	30	29	28
	29	27	28	29	29	29	29	29	30	28	29	28	27	28	28	29	27	29	29	30	30	30	29	29	29	29	29	29	30	30	30	30	29	30	29	28	29	29	29	30	30	29	30	30	30	29	30	29	28
	29	27	28	29	29	29	30	30	30	28	30	28	28	27	29	29	28	29	30	30	30	30	30	30	29	29	29	29	30	30	29	30	29	30	30	29	29	29	29	30	30	30	30	29	30	29	30	29	29
	29	28	28	29	29	29	30	29	30	28	29	28	27	28	28	29	27	29	29	30	30	30	29	29	29	29	29	30	30	30	29	30	29	30	29	28	29	29	29	30	30	30	30	30	30	29	30	29	29
	29	28	28	28	28	28	29	29	30	27	29	28	27	27	28	28	27	29	29	30	29	30	30	29	29	28	29	29	29	30	28	29	28	29	29	28	28	28	28	30	30	29	30	29	30	28	30	29	29
	28	28	28	29	29	29	30	29	30	28	29	28	27	26	29	28	28	28	29	29	30	30	30	29	29	28	28	29	30	30	29	30	29	29	29	28	29	29	29	30	30	30	30	29	30	29	30	29	29
	29	28	28	28	29	29	29	29	29	27	29	28	27	28	28	28	27	28	29	29	29	30	29	29	29	28	29	29	29	29	29	29	28	29	29	28	28	28	28	29	29	29	30	29	30	29	30	30	29
	29	28	28	29	29	29	30	29	30	29	29	28	27	27	28	28	28	28	29	30	30	30	30	30	29	28	29	29	30	30	28	29	29	29	28	28	28	29	27	30	30	29	30	29	30	29	30	29	29
	29	28	28	28	29	29	29	29	30	28	29	28	27	27	28	29	28	28	29	29	30	30	29	30	29	28	29	29	30	30	29	29	28	28	29	28	28	28	28	30	29	30	30	29	30	29	30	30	30
	29	28	28	29	29	29	29	29	30	28	29	28	27	27	28	28	27	27	29	29	30	30	30	29	29	29	29	29	29	30	28	29	28	28	28	27	28	29	27	30	29	29	30	29	30	29	30	30	30
	29	28	28	29	29	29	29	29	29	28	29	28	27	27	28	28	28	28	29	29	29	30	29	29	29	28	28	29	28	30	28	29	28	28	29	28	28	29	27	29	29	29	30	29	30	28	30	29	29
	29	28	28	29	29	29	29	29	29	29	29	28	27	27	29	28	27	27	29	29	29	30	30	29	29	29	29	29	29	30	29	29	28	28	27	28	28	28	28	29	29	29	30	29	30	29	30	30	30
	29	28	29	29	29	29	30	30	29	29	29	28	28	27	28	28	28	28	29	29	29	30	29	29	29	28	29	30	30	30	29	29	28	28	29	28	28	29	27	29	29	29	30	29	30	29	30	30	30
	29	28	28	29	29	29	30	30	29	29	29	28	27	27	28	28	26	28	29	29	29	30	30	30	29	29	29	29	30	30	29	29	29	28	28	27	28	28	27	29	28	29	30	30	30	29	30	30	30
	30	28	29	29	29	30	30	30	29	29	29	29	28	27	28	28	27	28	29	29	29	30	29	29	29	28	29	29	30	30	29	29	28	28	29	28	28	28	27	29	28	29	30	29	30	29	30	30	30
	29	28	28	29	29	30	30	30	29	29	29	28	28	26	28	29	27	28	29	30	30	30	29	30	28	28	28	29	30	30	29	29	29	27	28	27	27	27	26	29	29	29	30	30	30	29	30	30	30
	29	28	29	29	30	29	29	30	29	29	29	29	28	27	28	29	27	28	28	29	29	30	29	29	28	28	29	29	29	30	29	29	29	27	29	27	27	28	27	29	29	29	30	30	30	29	30	30	30
	29	28	29	29	29	30	29	30	29	29	29	29	28	27	28	29	26	28	29	30	30	30	29	30	29	29	29	29	30	30	29	29	29	27	28	27	27	27	26	28	28	29	30	30	30	30	30	30	30
	30	29	29	29	30	30	30	30	29	30	29	29	29	28	28	29	27	29	28	30	29	30	29	29	28	28	30	29	30	30	30	29	29	27	28	27	28	28	26	28	28	29	30	30	30	30	30	30	30
	29	28	28	29	29	29	29	29	28	29	29	29	29	28	27	29	27	29	29	30	30	30	29	30	29	29	29	29	30	30	30	29	29	27	28	27	27	27	26	28	28	29	30	30	30	30	30	30	30
	30	28	29	30	30	30	30	30	29	29	29	29	29	28	28	29	27	29	28	29	29	29	29	29	29	28	29	29	30	30	30	28	29	26	28	27	27	27	26	27	28	29	30	30	30	30	30	31	31
	29	28	28	29	29	29	29	29	29	29	29	29	29	28	27	29	27	29	29	30	30	30	29	30	29	29	29	30	30	30	30	29	29	27	29	27	27	27	26	27	28	29	30	30	31	30	30	30	30
	29	28	29	29	30	30	30	30	29	29	29	29	29	29	28	29	28	29	29	30	29	30	29	29	29	28	30	29	30	30	30	28	30	27	28	27	28	27	26	27	28	29	30	30	30	30	30	31	31
	29	29	29	29	29	29	29	29	29	29	29	29	29	29	28	29	28	29	29	29	29	30	29	30	29	29	29	30	30	30	30	29	29	27	29	28	28	28	26	28	28	29	30	30	30	30	30	30	30
	29	28	28	29	29	29	30	30	28	29	29	30	29	29	28	29	27	29	29	29	30	30	30	30	29	29	30	30	30	30	30	29	29	27	28	28	28	27	25	27	28	29	30	30	31	30	30	30	30
	30	29	29	29	30	29	30	30	29	30	29	30	29	30	28	29	28	29	29	29	29	30	29	30	29	29	30	30	30	30	30	29	30	27	29	28	28	27	25	27	28	29	30	30	30	30	30	31	31
	30	29	29	29	29	29	30	30	29	30	29	30	29	29	28	29	28	30	29	30	30	30	30	30	30	29	30	30	30	30	30	29	30	27	29	28	28	27	26	27	28	30	30	30	31	30	30	30	31
	29	29	29	29	30	29	30	30	29	30	29	30	29	29	28	29	28	30	29	30	30	30	30	30	30	29	30	30	30	30	30	29	30	27	29	29	28	27	26	27	28	30	30	30	30	30	31	30	31
	30	29	29	29	30	30	30	30	29	30	30	30	30	30	29	30	29	30	30	30	30	30	30	30	30	29	30	30	30	30	31	29	30	28	30	29	29	27	26	27	28	30	30	31	31	31	31	31	31
	29	29	29	29	30	29	30	30	29	30	29	30	29	30	28	30	29	30	29	30	30	30	30	30	30	30	30	30	31	30	30	29	30	28	29	29	28	27	27	27	29	29	30	30	30	30	31	30	30
	29	29	29	29	30	29	30	30	29	30	29	30	29	30	29	30	29	30	30	30	30	30	30	30	29	30	30	30	30	30	30	30	30	28	29	29	29	27	26	28	28	30	30	31	31	31	31	31	31
	30	29	29	29	30	30	30	30	29	29	29	30	29	30	29	30	29	30	30	30	30	30	29	30	30	29	30	30	30	30	30	29	30	28	29	29	29	27	27	27	28	30	30	30	30	31	31	31	31
	29	29	29	29	29	29	30	30	29	30	30	30	29	29	29	30	30	30	30	30	30	30	30	30	30	29	30	30	30	30	30	30	30	28	29	29	29	28	28	27	29	30	30	31	30	30	30	30	30
	30	29	30	29	30	30	30	30	29	31	30	30	29	30	30	30	30	30	30	30	30	30	30	30	30	29	30	30	30	30	30	30	30	29	29	30	29	28	28	28	29	30	30	31	31	31	31	31	31
	28	29	28	28	29	29	29	29	29	30	30	30	29	30	29	30	30	30	30	30	30	30	30	30	29	29	29	30	30	30	30	30	30	29	29	29	29	27	28	28	29	30	30	30	30	30	30	30	30
	29	29	29	29	30	29	30	30	30	30	30	30	30	30	30	30	30	30	30	31	30	30	30	30	29	30	30	30	31	30	30	30	31	30	30	30	30	28	28	28	30	30	30	31	31	31	31	31	31
	29	29	29	29	30	29	30	30	29	30	30	30	30	30	30	30	30	30	30	30	30	30	30	30	30	30	30	30	30	30	30	30	30	29	29	30	30	28	29	28	29	30	30	31	31	31	31	31	31
	29	29	29	29	30	29	30	30	29	30	30	30	29	30	30	30	30	30	30	30	30	30	30	30	30	30	29	30	30	30	30	30	31	30	29	30	30	28	29	28	30	30	30	31	31	31	31	31	31
	29	29	29	29	30	29	30	30	30	30	30	30	30	30	30	30	30	30	30	30	30	30	30	30	30	29	30	30	30	30	30	30	30	30	30	30	30	28	29	28	30	30	30	31	31	31	31	31	31
	30	29	29	29	30	29	30	30	30	30	30	30	30	30	30	30	30	30	30	30	30	30	30	30	30	29	29	30	30	30	30	30	30	30	30	30	30	28	29	28	30	30	31	31	31	31	31	31	31
	30	29	29	29	30	30	30	30	29	30	30	30	30	30	30	30	30	30	30	30	30	30	30	30	30	30	29	30	30	30	30	30	31	30	30	30	30	28	29	28	30	30	30	31	31	31	31	31	31
	29	29	29	29	30	30	30	30	30	30	30	30	30	31	30	30	30	30	30	31	30	30	30	30	30	30	30	30	31	30	30	30	31	30	30	30	30	29	29	29	30	30	31	31	31	31	31	31	31
	30	29	30	29	30	30	30	30	30	30	30	30	30	30	30	30	30	30	31	31	30	31	30	30	30	30	29	30	31	30	31	30	31	30	30	30	30	29	30	30	30	30	31	31	31	31	31	31	31
	30	30	29	29	30	30	30	30	30	30	30	30	30	30	30	30	30	30	30	31	30	30	30	30	30	30	30	30	31	30	31	30	31	30	30	30	30	29	29	29	30	31	31	31	31	31	31	31	31
	29	29	29	29	30	29	30	31	30	30	30	31	30	30	30	30	31	30	31	31	30	31	30	30	30	30	30	30	31	31	31	31	31	31	30	31	30	30	30	30	30	31	31	31	31	31	31	31	31
	30	29	29	29	30	30	30	31	30	30	30	31	30	31	30	30	30	31	31	31	30	30	30	30	30	30	30	30	31	31	30	31	31	31	30	30	30	30	30	30	30	31	31	31	31	31	31	31	31
	30	30	30	29	30	30	30	31	30	30	30	30	30	31	30	31	30	30	31	31	31	31	31	30	30	30	29	30	31	31	31	30	31	30	30	30	30	30	30	30	31	31	31	31	31	31	31	31	31
	30	29	30	29	30	30	30	31	30	30	31	30	30	30	30	30	30	30	30	31	30	31	30	30	30	30	30	30	31	31	31	31	31	31	30	30	30	30	30	30	30	31	31	31	31	31	31	31	31
	30	30	30	29	30	30	31	31	30	31	31	31	31	31	30	31	30	31	31	31	30	31	30	30	30	30	30	31	31	31	31	31	31	31	30	31	30	30	30	30	31	31	31	31	31	31	31	31	31
	29	29	30	29	30	30	30	31	30	31	31	31	31	31	30	31	31	31	31	31	30	31	30	30	30	30	30	30	31	31	31	31	31	31	31	31	30	30	30	31	31	31	31	31	31	31	31	31	31
	30	30	30	30	30	30	31	31	30	31	31	31	31	31	30	31	31	31	31	31	31	30	30	30	30	30	30	30	31	31	31	31	31	31	31	31	30	30	30	31	31	31	31	31	31	31	31	31	31
	29	29	30	29	30	30	30	31	30	31	31	31	31	31	30	31	30	31	31	31	31	31	31	30	30	30	30	30	31	31	31	31	31	31	31	31	31	30	30	31	31	31	31	31	31	31	31	31	31
	30	30	30	30	31	30	31	31	30	31	31	31	30	31	30	31	31	31	31	31	30	30	30	30	30	30	30	30	31	31	31	30	31	31	30	30	31	30	30	30	30	31	31	31	31	31	31	31	31
	30	30	30	30	31	30	31	31	31	31	31	31	31	31	31	31	31	31	31	31	31	31	30	30	30	30	30	30	31	30	31	31	31	31	31	31	31	31	30	31	31	31	31	31	31	31	31	31	31
	30	30	30	30	30	30	31	31	31	31	31	31	31	31	31	31	31	31	31	31	31	31	31	30	30	30	30	30	31	31	31	31	31	31	31	31	31	31	30	31	31	31	31	31	31	31	31	31	31
	30	30	30	30	31	31	31	31	31	31	31	31	31	31	31	31	31	31	31	31	30	31	30	30	30	30	30	31	31	31	31	31	31	31	31	31	31	30	30	31	31	31	31	31	31	31	31	31	31
	30	30	30	30	30	30	31	31	31	31	31	31	31	31	31	31	31	31	31	31	31	31	31	31	30	30	30	31	31	31	31	31	31	31	31	31	31	31	31	31	31	31	31	31	31	31	31	31	31
	30	30	30	30	30	30	31	31	31	31	31	31	31	31	31	31	31	31	31	31	31	31	30	30	30	30	30	31	31	31	31	31	31	31	31	31	31	31	30	31	31	31	31	31	31	31	31	31	31
	30	30	30	30	31	31	31	31	31	31	31	31	31	31	31	31	31	31	31	31	31	31	30	31	30	30	30	31	31	31	31	31	31	31	31	31	31	31	31	31	31	31	31	31	31	31	31	31	31
	30	30	30	30	30	30	31	31	31	30	31	31	30	31	31	31	30	31	31	31	31	31	30	30	30	30	30	30	31	31	31	31	31	31	30	31	31	31	30	31	30	31	31	31	31	31	31	31	31
	30	30	30	30	31	31	31	31	31	30	31	31	30	31	31	31	31	30	31	30	30	30	30	30	30	30	30	30	31	31	31	31	31	31	31	31	31	31	31	31	31	31	31	31	31	31	31	31	31
	30	30	30	30	30	31	30	31	31	31	31	31	31	31	31	31	30	31	31	31	30	31	30	30	30	30	30	31	31	31	31	31	31	31	31	31	31	31	31	31	31	31	31	31	31	31	31	31	31
	30	30	31	30	31	31	31	31	31	31	31	31	30	31	31	30	31	31	30	31	31	30	30	31	30	30	30	31	31	31	30	30	31	30	30	31	31	31	30	31	31	31	31	31	31	31	31	31	31
	30	30	30	30	31	31	30	31	31	31	31	31	30	31	31	31	31	31	31	31	30	30	30	30	30	30	30	31	31	30	31	31	31	31	31	31	31	31	30	31	31	31	31	31	31	31	31	31	31
	30	30	30	30	30	30	30	31	31	30	31	31	31	31	31	31	30	31	31	31	30	30	30	31	30	30	30	31	31	31	31	31	31	31	31	31	31	31	30	31	31	31	31	31	31	31	31	31	31
	30	30	30	30	31	31	31	31	31	31	31	31	31	31	31	31	31	31	31	31	31	31	31	31	31	31	30	31	31	31	31	31	31	31	31	31	31	31	31	31	31	31	31	31	31	31	31	31	31
	30	30	30	30	31	30	31	31	31	31	31	31	30	31	31	31	31	31	31	30	31	30	30	30	30	30	30	31	31	31	31	31	31	31	30	31	31	31	31	31	31	31	31	31	31	31	31	31	31
	30	30	30	31	30	31	31	31	31	31	31	31	31	31	30	31	31	31	31	31	31	31	30	31	30	30	30	30	31	31	31	31	31	31	31	31	31	31	31	31	31	31	31	31	31	31	31	31	31
	30	30	30	30	31	30	31	31	31	31	31	31	31	31	31	31	31	31	31	31	31	31	30	31	30	31	30	31	31	31	31	31	31	31	31	31	31	31	31	31	31	31	31	31	31	31	31	31	31
	30	30	30	30	31	30	31	31	31	31	31	31	31	31	31	31	31	31	31	31	31	30	30	31	30	31	30	31	31	31	31	31	31	31	31	31	31	31	31	31	31	31	31	31	31	31	31	31	31
	30	30	30	31	31	31	31	31	31	31	31	31	31	31	31	31	31	31	31	31	31	31	30	31	30	30	30	31	31	31	31	31	31	31	31	31	31	31	31	31	31	31	31	31	31	31	31	31	31
	30	30	30	31	31	30	31	31	31	31	31	31	31	31	31	31	31	31	31	31	31	31	31	31	30	31	30	31	31	31	31	31	31	31	31	31	31	31	31	31	31	31	31	31	31	31	31	31	31
	30	31	30	31	31	31	31	31	31	31	31	31	31	31	31	31	31	31	31	31	31	31	30	31	30	30	30	31	31	31	31	31	31	31	31	31	31	31	31	31	31	31	31	31	31	31	31	31	31
	30	30	30	30	30	30	31	31	31	31	31	31	31	31	31	31	31	31	31	31	31	30	30	31	30	30	30	31	31	31	31	31	31	31	31	31	31	31	31	31	31	31	31	31	31	31	31	31	31
	30	30	30	30	31	31	31	31	31	31	31	31	31	31	31	31	31	31	31	31	31	30	30	31	30	30	30	31	31	31	31	31	31	31	31	31	31	31	31	31	31	31	31	31	31	31	31	31	31
	30	30	30	30	31	31	31	31	31	31	31	31	31	31	31	31	31	31	31	31	31	30	31	31	30	30	30	31	31	31	31	31	31	31	31	31	31	31	31	31	31	31	31	31	31	31	31	31	31
	30	30	30	30	31	31	31	31	31	31	31	31	31	31	31	31	31	31	31	31	31	30	30	31	30	30	30	31	31	31	31	31	31	31	31	31	31	31	31	31	31	31	31	31	31	31	31	31	31
	30	30	30	30	31	31	31	31	31	31	31	31	31	31	31	31	31	31	31	31	31	30	30	30	30	30	30	31	31	31	31	31	31	31	31	31	31	31	31	31	31	31	31	31	31	31	31	31	31
	30	30	30	30	31	31	31	31	31	31	31	31	31	31	31	31	31	31	31	31	31	30	30	30	30	30	30	31	31	31	31	31	31	31	31	31	31	31	31	31	31	31	31	31	31	31	31	31	31
	30	31	30	30	31	31	31	31	31	31	31	31	31	31	31	31	31	31	31	31	31	30	30	30	30	30	30	31	31	31	31	31	31	31	31	31	31	31	31	31	31	31	31	31	31	31	31	31	31
	30	30	30	30	31	31	31	31	31	31	31	31	31	31	31	31	31	31	31	31	31	30	30	30	30	30	30	31	31	31	31	31	31	31	31	31	31	31	31	31	31	31	31	31	31	31	31	31	31
	30	30	30	31	30	31	31	31	31	31	31	31	31	31	31	31	31	31	31	31	31	30	30	31	30	30	30	31	31	31	31	31	31	31	31	31	31	31	31	31	31	31	31	31	31	31	31	31	31
	30	30	30	30	31	31	31	31	31	31	31	31	31	31	31	31	31	31	31	31	30	30	30	30	30	30	30	31	31	31	31	31	31	31	31	31	31	31	31	31	31	31	31	31	31	31	31	31	31
	30	30	30	30	30	30	31	31	31	31	31	31	30	31	31	31	30	30	30	30	30	30	30	30	30	30	29	30	30	30	30	31	31	31	31	31	31	31	31	31	31	31	31	31	31	31	31	31	31
	30	30	30	31	31	31	31	31	31	31	31	31	31	31	31	31	30	31	31	30	30	30	30	30	29	30	29	30	31	30	31	31	31	30	31	31	31	31	31	31	31	31	31	31	31	31	31	31	31
	30	30	30	31	31	31	31	31	31	31	31	31	30	30	31	30	30	30	30	30	30	30	30	29	29	30	29	30	30	30	30	30	31	30	30	30	30	30	30	31	31	31	31	31	31	31	31	31	30
	30	30	30	31	30	30	31	31	31	30	31	31	30	31	31	30	30	30	30	30	30	30	30	29	29	29	29	30	30	29	30	30	31	30	30	31	31	30	31	31	30	30	30	30	30	30	30	31	30
	30	30	30	31	31	31	31	31	31	31	31	31	30	30	30	30	30	30	30	30	30	29	30	30	30	30	30	30	30	30	30	30	30	30	30	30	30	31	30	31	30	30	30	30	31	31	31	31	31
	30	30	30	30	30	31	30	31	30	30	30	30	30	30	30	30	30	29	30	29	29	29	29	29	29	29	29	30	29	29	29	29	30	30	30	30	30	30	30	30	30	30	30	30	30	30	30	30	30
	30	30	30	30	31	31	31	31	31	31	30	31	30	31	30	30	30	30	30	29	30	29	29	30	29	30	29	30	30	29	30	29	30	30	30	30	30	30	30	30	30	30	30	30	30	30	30	31	31
	30	30	30	30	31	31	31	31	30	30	30	30	30	31	30	30	30	30	30	29	29	29	29	29	29	29	29	30	29	29	30	30	30	30	30	30	30	30	29	30	30	30	30	30	30	30	30	30	30
	30	30	30	30	30	30	31	30	31	31	30	31	30	31	31	30	30	30	30	29	30	29	29	29	29	29	28	30	30	29	30	30	30	30	30	30	31	30	30	30	30	30	30	30	30	31	30	30	30
	30	30	30	30	30	30	30	30	30	30	31	30	30	30	30	30	30	30	30	29	30	30	29	30	29	30	30	30	30	30	30	30	30	30	30	30	30	30	30	30	30	30	31	30	31	31	31	31	30
	30	30	30	30	30	30	30	30	31	30	31	31	30	30	30	30	30	30	30	28	30	29	28	29	29	29	29	30	29	30	30	30	30	30	30	31	30	30	30	31	30	31	30	31	30	31	31	31	30
	30	30	30	30	30	30	31	31	31	30	31	31	31	31	31	31	30	31	30	29	30	29	28	30	29	29	30	30	30	30	30	30	31	30	31	30	31	30	30	31	30	31	31	31	31	31	31	31	31
	30	30	30	30	30	30	31	31	31	31	31	31	30	30	30	30	30	30	30	28	30	29	28	29	28	29	29	30	29	30	30	30	31	30	31	30	30	30	30	31	30	30	30	31	30	30	31	31	30
	30	30	30	30	30	30	31	30	30	30	30	30	30	30	30	30	30	30	30	27	29	29	28	29	28	29	29	30	29	30	30	30	30	30	30	30	30	30	30	30	30	31	30	31	31	31	30	30	30
	30	30	30	31	31	31	31	31	31	31	31	31	31	31	31	30	30	30	30	27	30	29	28	29	29	30	30	30	29	30	30	30	30	31	31	31	31	31	30	31	30	31	30	31	31	31	31	31	31
	30	30	30	30	30	30	30	31	31	30	31	31	30	30	30	30	30	30	30	26	29	29	28	28	28	29	29	30	28	30	30	30	30	30	30	30	30	30	30	31	30	30	30	31	30	30	31	31	30
	30	30	29	30	30	30	30	30	30	30	30	30	30	30	30	30	30	30	29	26	27	28	28	28	28	28	29	30	28	30	30	29	30	30	30	30	30	30	30	30	29	31	30	31	31	30	30	30	31
	30	30	30	30	31	31	31	31	31	31	31	31	30	31	31	30	30	30	30	27	29	29	29	29	29	28	30	30	28	30	30	30	30	30	31	30	30	31	30	31	30	31	30	31	31	30	31	30	31
	29	30	30	30	30	30	30	30	30	30	30	30	30	30	30	30	30	30	29	26	28	29	29	29	28	28	29	30	28	30	29	30	30	30	30	30	30	30	29	30	30	30	30	31	30	30	30	30	30
	30	30	30	30	30	30	30	31	30	30	31	31	30	30	30	30	29	30	29	26	26	28	28	27	29	28	29	30	27	30	29	30	30	30	31	30	30	31	30	31	29	31	30	31	31	30	31	30	31
	30	30	30	30	30	30	31	31	31	31	31	31	29	30	30	30	30	29	29	27	28	28	28	28	29	28	29	29	28	30	29	30	30	30	31	30	30	30	30	31	30	31	30	30	30	30	31	30	31
	30	30	30	30	30	30	30	30	30	31	30	31	30	30	30	30	29	29	29	26	28	29	29	29	29	28	29	30	28	30	28	30	30	30	31	30	30	31	30	31	30	31	30	31	31	30	30	30	30
	29	30	30	30	30	31	31	31	31	31	31	31	29	31	31	30	30	29	28	26	26	28	28	28	29	29	30	30	28	30	29	30	30	30	31	30	31	31	31	31	29	31	30	30	31	30	31	30	31
	30	30	30	30	30	30	30	30	30	30	30	30	29	29	30	30	29	29	29	26	27	29	29	29	28	29	29	30	27	30	28	30	30	30	30	30	30	30	30	30	30	31	30	30	31	30	31	30	30
	30	30	29	30	30	30	31	30	30	30	31	31	29	30	30	30	29	29	29	27	26	29	30	28	29	29	30	30	27	30	28	30	30	30	31	30	31	31	30	31	30	31	31	30	31	29	31	30	30
	30	30	30	30	30	30	31	31	31	31	31	31	30	30	30	30	29	29	29	26	27	30	29	28	29	29	30	30	27	30	29	30	30	30	31	30	30	31	30	31	30	31	30	31	31	30	31	30	31
	30	30	29	30	30	30	30	30	31	30	31	31	30	30	30	30	29	29	30	27	28	30	30	29	29	29	29	30	28	30	29	30	30	30	31	30	30	31	30	31	30	31	31	31	31	30	31	30	30
	30	30	30	30	30	31	31	31	31	31	31	31	30	30	31	30	30	30	29	27	28	30	30	29	30	29	30	30	28	31	29	30	30	31	31	31	31	31	31	31	30	31	31	31	31	30	31	30	31
	30	30	30	30	30	30	30	30	30	30	30	30	29	29	30	30	29	29	29	27	28	30	30	29	29	29	30	30	28	30	29	30	30	30	30	30	30	30	30	31	30	31	31	30	31	30	31	30	30
	30	30	30	30	30	30	30	31	31	30	31	31	29	30	30	30	29	29	30	27	27	30	30	28	30	29	30	30	28	31	29	30	30	31	31	30	30	31	30	31	30	31	31	31	31	30	31	30	31
	30	30	30	30	31	31	31	31	31	31	31	31	29	30	30	30	29	29	29	27	28	30	30	29	30	30	30	30	28	31	28	30	30	31	31	30	31	31	31	31	31	31	31	31	31	30	31	30	31
	30	30	30	31	30	31	31	31	31	31	31	31	30	30	30	31	29	30	30	28	28	30	30	29	30	30	30	30	29	31	29	31	31	31	31	30	30	31	31	31	31	31	31	31	31	30	31	30	31
	30	30	30	30	30	30	31	30	30	30	31	30	30	29	30	31	29	29	29	27	28	30	30	30	30	30	29	30	29	31	29	30	30	30	31	30	30	31	30	31	30	31	31	31	31	30	31	30	30
	30	30	30	30	30	30	31	31	31	31	31	31	30	30	30	31	30	30	30	28	28	30	30	29	30	30	30	30	28	31	29	30	30	31	31	30	31	31	31	31	31	31	31	31	31	30	31	30	30
	29	30	29	30	30	30	30	30	30	30	30	30	30	29	30	30	29	30	29	28	28	30	29	29	29	30	29	30	29	30	29	30	30	30	30	29	30	30	29	31	30	30	31	30	31	29	31	30	30
	29	29	29	30	30	30	30	30	30	30	30	30	29	29	30	30	29	29	30	29	28	30	30	28	29	29	29	29	29	30	29	30	30	30	30	29	30	30	30	30	31	30	31	30	30	29	30	29	30
	28	29	28	30	30	30	30	30	30	30	30	30	29	29	30	30	29	30	30	29	28	30	29	29	30	29	30	30	28	30	29	30	30	30	30	30	30	30	30	31	31	30	31	30	31	29	30	29	30
[truncated: 751 more columns]
